# Supplementary material for: Cell surface localisation of GPI-anchored receptors in Trypanosoma brucei
Source: eLife journal article supplement (doi:10.7554/elife.107191), 2025-06-20
Supplement: fig2-data2 [file Figure 2_Source_data_2.pdf › Figure 2_Source_data_2.pdf]

Colorimetric western blot protein standards will overlay precisely with the anti-TfR blot

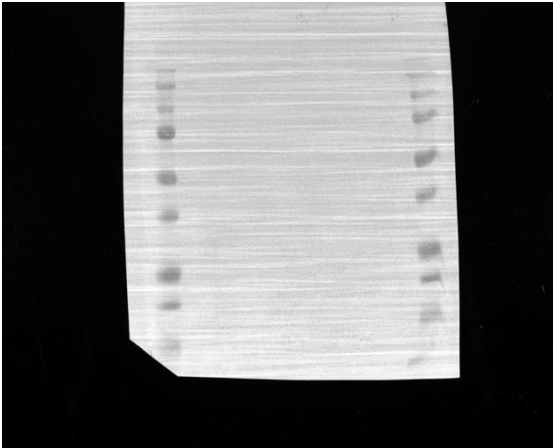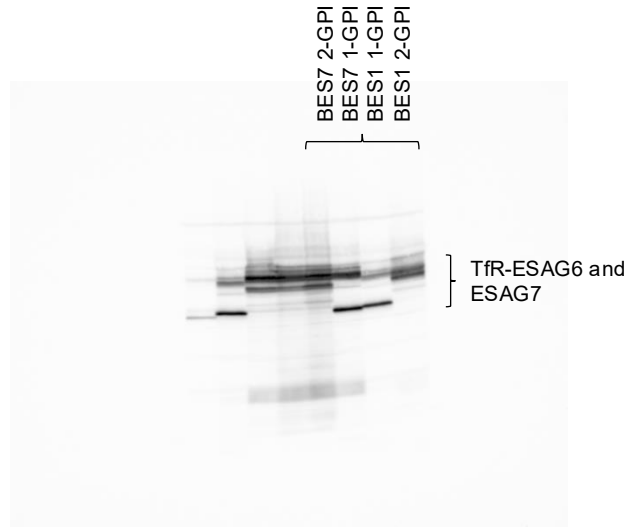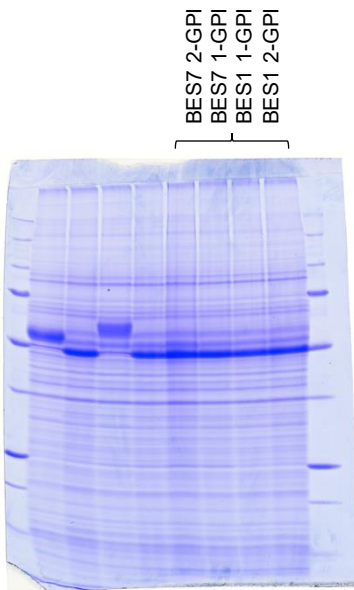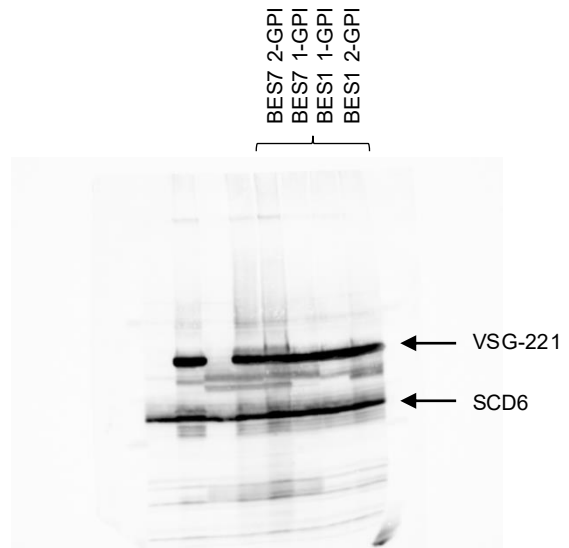

**Figure 2, Source data 2** Original Coomassie Blue stained gel and membranes corresponding to Figure 2, panel B. Only the second four lanes are used in this figure. Markers are Precision Plus Protein Markers (BioRad): unstained for the Coomassie Blue gel and pre-stained all blue for the membranes. The same membrane was probed sequentially with anti-TfR antibodies then anti-SCD6 and anti-VSG221 antibodies.
