# Supplementary material for: Cell surface localisation of GPI-anchored receptors in Trypanosoma brucei
Source: eLife journal article supplement (doi:10.7554/elife.107191), 2025-06-20
Supplement: fig3-figsupp4-data2 [file Figure S4_Source data 2.pdf › Figure S4_Source data 2.pdf]

Colorimetric western blot protein standards-will overlay precisely with the anti-TfR blot

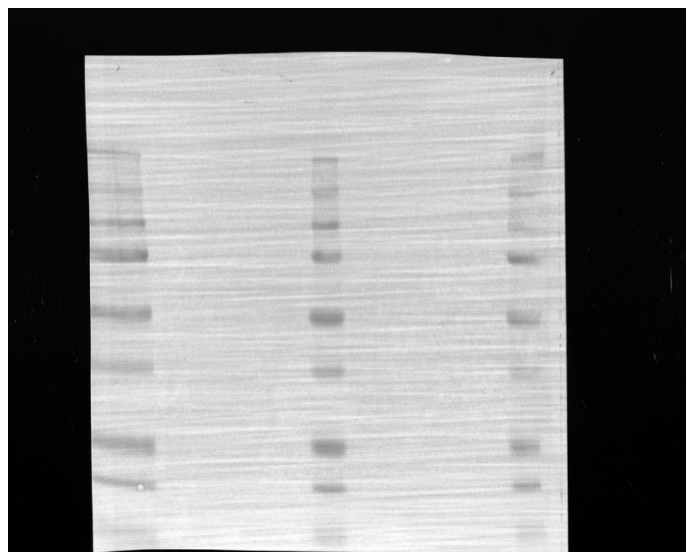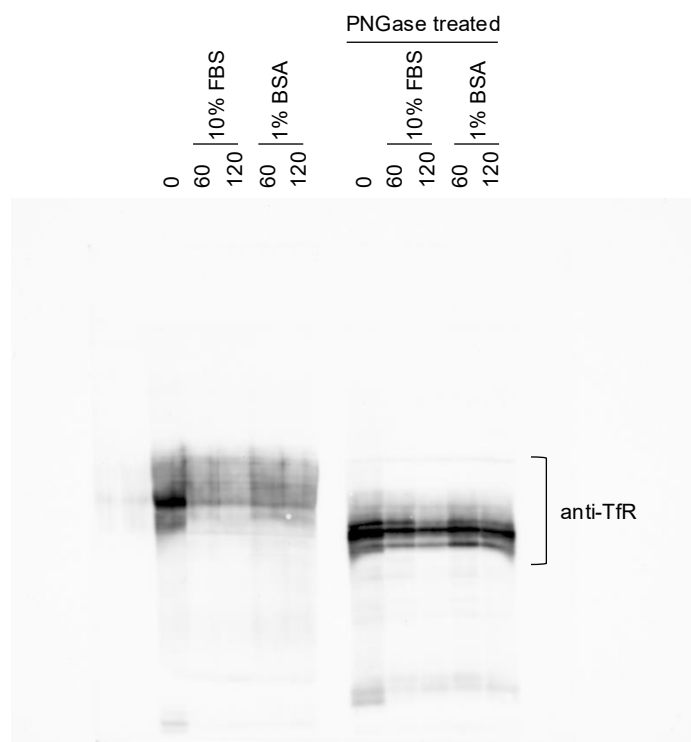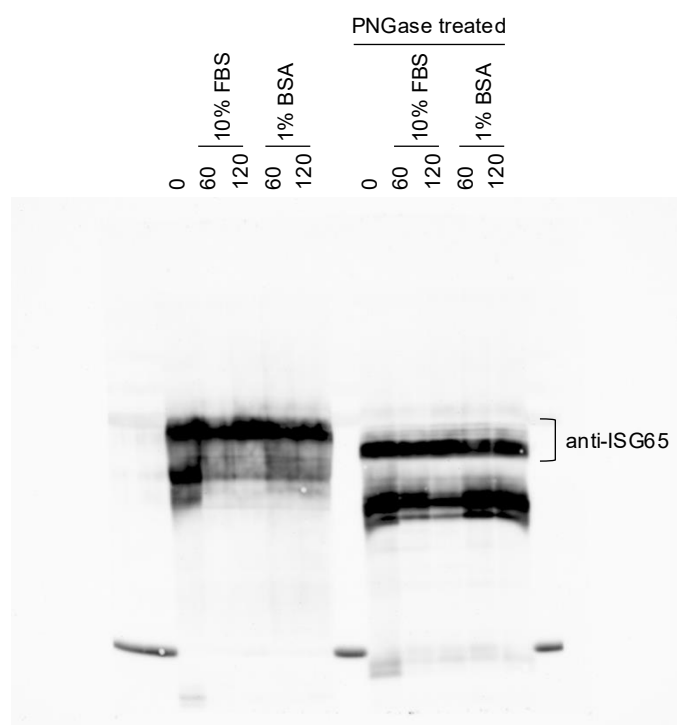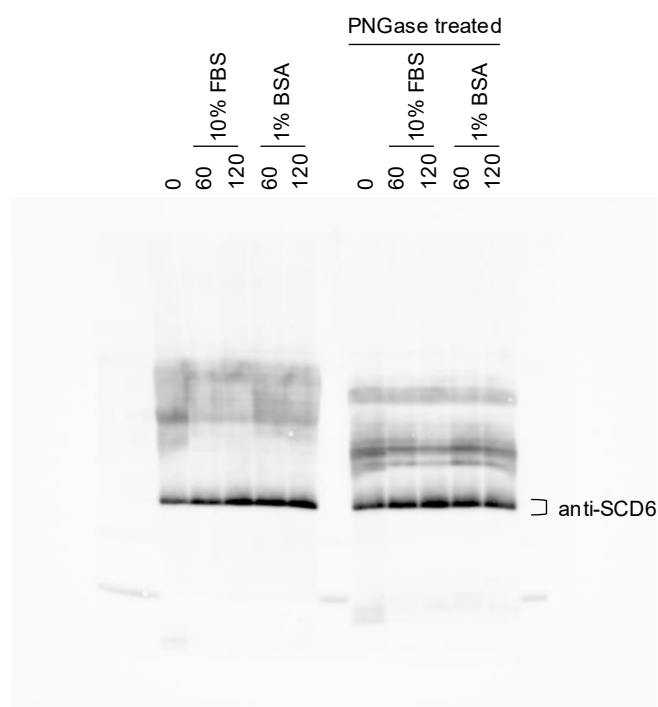

**Figure S4, Source data 2.** Original membranes corresponding to Figure S4, panel D. Markers are Pre-Stained all blue Precision Plus Protein Markers (BioRad). The same membrane was probed sequentially with anti-TfR, anti-IG65 and anti-SCD6 antibodies.
