# Supplementary material for: Cell surface localisation of GPI-anchored receptors in Trypanosoma brucei
Source: eLife. 2026 May 19;14:RP107191. doi: 10.7554/eLife.107191 (PMC13186567; doi:10.7554/eLife.107191)
Supplement: Supplementary file 1. [file elife-107191-supp1.xlsx]

## Sheet: ESAG VSG ratio
		BES3	BES1	BES7		Geneid
	BES3 VSG	76528.4	12.6462	0		Tb427_000487400
	BES1 VSG	4.97759	71558.3	8.75512		Tb427_000016000
	BES7 VSG	5.29842	0.656501	72658.6		Tb427_000025600
	BES1 ESAG6	3.43981	567.444	7.57172		Tb427_000014400
	BES1 ESAG7	4.41148	892.73	14.7553		Tb427_000014300:pseudogene
	BES2 ESAG6	2.76312	188.807	3.24123		Tb427_000016400
	BES2 ESAG7a	3.06759	149.086	4.18434		Tb427_000016200:pseudogene
	BES2 ESAG7b	3.94404	130.025	4.73491		Tb427_000016300:pseudogene
	BES3 ESAG6	419.829	9.26143	13.7431		Tb427_000019200
	BES3 ESAG7	897.499	17.4319	38.833		Tb427_000019100:pseudogene
	BES4 ESAG6	5.03437	126.731	4.42573		Tb427_000020600
	BES4 ESAG7a	6.11936	72.4858	5.90338		Tb427_000020400:pseudogene
	BES4 ESAG7b	6.09022	70.1476	5.65626		Tb427_000020500:pseudogene
	BES5 ESAG6	10.7423	140.083	8.18277		Tb427_000022500
	BES5 ESAG7	7.56671	50.0395	6.52427		Tb427_000022400:pseudogene
	BES7 ESAG6a	5.7375	4.35244	1128.72		Tb427_000024300
	BES7 ESAG6b	4.07812	6.04506	1568.01		Tb427_000024400
	BES7 ESAG7	4.95888	5.5762	2075.68		Tb427_000024200
	BES10 ESAG6	51.0194	3.96918	11.346		Tb427_000005600
	BES10 ESAG7	44.3756	8.08639	31.0498		Tb427_000005500:pseudogene
	BES11 ESAG6	3.88125	2.84789	29.2045		Tb427_000006100
	BES11 ESAG7	5.21376	3.94526	9.85315		Tb427_000006000:pseudogene
	BES12 ESAG6	10.6296	16.5644	29.4633		Tb427_000007400
	BES12 ESAG7	15.6706	11.8638	40.6822		Tb427_000007500:pseudogene
	BES13 ESAG6	7.43386	6.80432	23.5976		Tb427_000008500
	BES13 ESAG7	7.30378	6.00028	16.2143		Tb427_000008600:pseudogene
	BES14 ESAG6	5.10332	19.4463	24.0701		Tb427_000009700
	BES14 ESAG7	10.0208	19.6474	61.5263		Tb427_000009600:pseudogene
	BES15 ESAG6	14.9152	40.8318	146.466		Tb427_000011200
	BES15 ESAG7	47.8184	89.0763	197.667		Tb427_000011100:pseudogene
	BES17 ESAG6	77.787	8.6944	25.7816		Tb427_000013100
	BES17 ESAG7	31.8977	15.4733	59.9469		Tb427_000013000:pseudogene
	ESAG6	622.394	1141.88	3023.82
	ESAG7	1095.96	1541.61	2573.21
	ESAG 6+7 total	1718.35	2683.5	5597.03
	ESAG 6+7 total/VSG	0.0224538	0.0375008	0.077032

## Sheet: VSG TfR TPM
Geneid		BES3	BES1	BES7
Tb427_000487400	BES3 VSG118	76528.4	12.6462	0
Tb427_000016000	BES1 VSG221	4.97759	71558.3	8.75512
Tb427_000025600	BES7 VSG224	5.29842	0.656501	72658.6
Tb427_110013500		2847.08	3295.79	3407.46
Tb427_100060400		2276.31	1987.81	2065.16
Tb427_080057900		2132.31	2584.02	2423.48
Tb427_100064900		2065.27	2164.39	2387.75
Tb427_000236800		1926.14	0.361355	0
Tb427_010018100		1857.34	1777.21	1786.91
Tb427_030033300		1854.8	1229.24	1142.9
Tb427_010017900		1849.99	1743.61	1788.3
Tb427_010017700		1841.11	1770.77	1777.89
Tb427_010017500		1823.47	1718.21	1758.94
Tb427_110089700		1821.92	2252.68	2354.15
Tb427_110180700		1816.93	1986.59	2048.87
Tb427_100037700		1815.27	2192.89	2447.75
Tb427_010018300		1808.03	1725.84	1766.47
Tb427_100060200		1805.88	1563.67	1632.16
Tb427_010017300		1803.16	1728.47	1767.74
Tb427_010017100		1801.75	1726.28	1758.41
Tb427_050021900		1751.2	1433.66	1505.64
Tb427_040024200		1579.18	1964.18	2019.27
Tb427_010018400		1577.9	1523.52	1541.94
Tb427_010017800		1568.17	1516.35	1548.16
Tb427_010017400		1568.12	1540.34	1550.02
Tb427_010018200		1561.19	1516.47	1541.63
Tb427_010017600		1559.51	1518.62	1534.58
Tb427_010017200		1554.46	1501.91	1537.22
Tb427_010018000		1554.01	1518.14	1546.72
Tb427_040020900		1543.84	1965.37	1900.2
Tb427_110012100		1529.8	1864.48	1860.29
Tb427_100091100		1449.41	1820.98	2018.07
Tb427_110110200		1409.14	1632.19	1662.52
Tb427_090089800		1404.53	1799.79	1767.29
Tb427_110123100		1404.01	1582.3	1598.12
Tb427_110124300		1370.78	1515.77	1540.76
Tb427_100045500:pseudogene		1339.21	1489.56	1512.6
Tb427_090082800		1315.78	1492.44	1560.23
Tb427_090082500		1310.43	1449.01	1349.68
Tb427_090027100		1302.1	1418.92	1248.46
Tb427_030013400		1298.04	1250.02	1152.08
Tb427_030033800		1297.17	1111.32	1038.75
Tb427_060047900		1290.61	1384.02	1520.82
Tb427_060047700		1283.42	1359.93	1533.34
Tb427_090065200		1281.97	1558.13	1555.49
Tb427_060048100		1271.64	1384.74	1545.45
Tb427_080066000		1263.07	1506.21	1527.41
Tb427_110129900		1261.48	1388.63	1412.95
Tb427_110037400		1261.12	1496.73	1568.96
Tb427_110129800		1260.81	1401.19	1423.6
Tb427_100154100		1258.78	1523.58	1599.24
Tb427_030040400		1236.36	927.279	883.73
Tb427_080011300		1232.2	1505.85	1576.39
Tb427_100058600		1226.1	1421.72	1549.67
Tb427_010022900		1223.85	1435.48	1548.3
Tb427_110070000		1221.59	1310.48	1259.01
Tb427_110159100		1207.19	1455.25	1470.66
Tb427_110127800		1206.26	1477.17	1551.32
Tb427_090023700		1188.66	1429.07	1608.06
Tb427_090024000		1185.1	1434.6	1605.85
Tb427_110105600		1184.69	1564.09	1501.54
Tb427_100089200		1183.82	1316.23	1296.74
Tb427_030033700		1176.16	1038.23	970.981
Tb427_100120100		1172.82	1288.07	1173.32
Tb427_100045600		1156.78	1377.58	1362.54
Tb427_100120900		1148.73	1529.64	1554.2
Tb427_060010600		1142.11	1419.87	1469.01
Tb427_100096400		1140.92	1099.45	1091.34
Tb427_100008800		1136.57	1310.07	1403.41
Tb427_100105600		1136.04	1357.41	1461.9
Tb427_090065500		1130.32	1178.51	1295.21
Tb427_090008900		1127.09	1312.26	1247.21
Tb427_090008800		1121.09	1293.28	1247.55
Tb427_030055300		1118.33	842.991	847.774
Tb427_100097400		1113.89	1211.17	1063.22
Tb427_110064600		1112.2	1105.45	1073.64
Tb427_100104800		1109.82	1408.02	1400.66
Tb427_100149600		1102.88	1373.78	1315.69
Tb427_100060100		1081.67	1313.19	1341.29
Tb427_110146800		1079.44	1294.8	1280.74
Tb427_100155400		1059.95	1236.64	1388.83
Tb427_080013500		1058.13	1297.27	1354.81
Tb427_110048200		1056.14	1267	1336.8
Tb427_050014700		1052.16	752.556	743.389
Tb427_080067500		1050.7	1316.61	1270.36
Tb427_100142600		1050.53	1300.58	1348.39
Tb427_050024500		1044.47	866.84	877.931
Tb427_020031100		1037.57	1223.94	1395.68
Tb427_090045300		1033.73	1301.66	1343.24
Tb427_060052100		1028.21	1235.52	1215.63
Tb427_030010900		1023.16	716.797	699.469
Tb427_090085400		1022.35	1234.86	1267.25
Tb427_030037300		1017.88	782.342	736.226
Tb427_060055400		1016.57	1263.87	1258.16
Tb427_110158000		1014.74	1148.79	1135.52
Tb427_110131300		1012.69	1226.42	1210.28
Tb427_080013400		1011.85	1249.15	1297.85
Tb427_110083700		1007.6	1324.25	1365.28
Tb427_070050700		1002.11	1162.39	1148.32
Tb427_090031400		1000.8	1269.63	1278.52
Tb427_030053900		995.704	945.807	989.7
Tb427_040027800		995.448	950.444	835.131
Tb427_030054000		992.9	947.42	993.138
Tb427_100062500		989.017	1058.34	1081.92
Tb427_100014600		977.633	1267.3	1197.8
Tb427_100123000		976.124	1168.76	1183.63
Tb427_110011100		974.175	1190.49	1195.86
Tb427_100049800		973.138	971.867	1000.15
Tb427_110066300		973.114	1233.48	1340.56
Tb427_110177700		971.662	1183.86	1264.04
Tb427_110177900		964.237	1192	1274.05
Tb427_110105700		958.651	1262.4	1214.01
Tb427_100159900		952.7	1110.18	1211.42
Tb427_030040600		951.518	986.123	966.534
Tb427_040015300		950.147	969.626	910.836
Tb427_040038300		943.032	1087.85	1107.4
Tb427_100038600		937.829	1093.57	1174.76
Tb427_110133800		934.715	1154.54	1125.6
Tb427_110105500		928.269	1121.14	1187.5
Tb427_100134200		925.592	1187.04	1190.64
Tb427_100049600		923.401	899.846	927.161
Tb427_080065700		922.247	1115.92	1172.54
Tb427_060025300		919.181	1151.78	1023.54
Tb427_100043900		918.05	1120.98	1136.41
Tb427_080065800		914.514	1105.35	1232.46
Tb427_100057800		913.192	1069	1163.39
Tb427_090032800		912.546	1102.66	1144.39
Tb427_090065300		911.005	1459.99	1527.25
Tb427_110108800		908.74	1111.55	1201.93
Tb427_100049700		907.463	908.058	940.292
Tb427_090011600		901.912	965.279	1026.59
Tb427_080065900		900.946	910.019	1116.49
Tb427_100006100		900.504	1050.33	1186.15
Tb427_110041200		900.043	1035.07	1145.8
Tb427_060056300		899.789	1123.45	1037.93
Tb427_090082700		899.637	1049.97	1123.09
Tb427_060054800		898.496	1074.99	1121.27
Tb427_000019100:pseudogene	BES3 ESAG7	897.499	17.4319	38.833
Tb427_100054400		891.483	1133.06	1120.58
Tb427_030046700		888.878	738.886	831.709
Tb427_100014800		888.718	1081.18	1151.1
Tb427_110035000		884.282	1169.38	1262.26
Tb427_100025200		882.34	775.788	838.055
Tb427_110041300		879.618	991.242	1107.31
Tb427_090047200		877.608	1027.01	1112.9
Tb427_110084200		877.599	1013.01	1068.66
Tb427_100024900		875.078	775.86	835.191
Tb427_060046300		873.408	858.361	1001.89
Tb427_100142900		872.4	1077.07	1085.19
Tb427_100024700		871.561	780.108	833.226
Tb427_110066900		867.966	1062.64	1089.85
Tb427_090028400		866.428	910.328	1001.87
Tb427_100025100		866.335	773.652	832.942
Tb427_070057500		864.825	1101.52	1154.39
Tb427_110107000		864.493	975.057	942.839
Tb427_100025000		863.571	769.284	846.27
Tb427_110066700		862.044	1048.24	1108.33
Tb427_100033500		861.983	984.529	968.606
Tb427_090077900		861.727	903.989	855.108
Tb427_100024600		860.405	771.444	840.636
Tb427_100025300		860.129	770.868	841.346
Tb427_110083500		859.371	1161.97	1212.43
Tb427_100024800		857.792	762.803	832.113
Tb427_100024500		857.491	769.764	831.545
Tb427_090070500		855.386	1047.59	1044.22
Tb427_100044000		851.532	1027.1	1049.06
Tb427_100033400		851.518	977.445	962.189
Tb427_100023600		850.627	745.944	843.91
Tb427_040020200		847.548	987.819	1075.39
Tb427_020032000		847.44	1004.24	1068.84
Tb427_100033300		843.499	980.233	970.117
Tb427_010019100		840.965	766.674	857.372
Tb427_010019200		840.628	765.949	849.183
Tb427_110053300		840.521	920.048	1046.09
Tb427_100057700		839.342	968.674	1060.98
Tb427_010019000		839.278	775.299	863.255
Tb427_100038700		838.53	990.735	1083.6
Tb427_010018800		838.012	775.46	851.807
Tb427_090088300		837.431	988.683	1089.39
Tb427_100024400		834.527	754.955	798.495
Tb427_090082600		833.137	888.545	999.601
Tb427_070028000		832.229	998.941	1020.23
Tb427_070042200		831.964	1100.88	936.613
Tb427_030006900		828.204	609.033	519.828
Tb427_100005600		826.439	1001.34	1081.79
Tb427_090070400		821.049	1006.96	944.953
Tb427_010018900		820.884	765.143	843.936
Tb427_000019800:pseudogene		816.427	2.56228	0.223948
Tb427_050015800		815.219	654.03	691.338
Tb427_100058800		815.216	928.157	982.747
Tb427_090058000		810.504	948.271	735.851
Tb427_010019300		808.819	772.961	849.422
Tb427_080070200		807.748	825.884	771.247
Tb427_090043000		805.643	996.36	1006.02
Tb427_080067300		801.823	1006.55	1044.96
Tb427_090043100		800.995	1008.84	1017.25
Tb427_110146700		796.083	969.617	952.791
Tb427_110067900		795.995	985.673	1016.33
Tb427_010018700		794.812	745.799	826.604
Tb427_110108700		790.024	900.192	987.525
Tb427_080067200		786.27	903.821	977.186
Tb427_100032800		776.858	990.52	1006.01
Tb427_100057400		775.653	1002.41	1011.53
Tb427_100043000		769.453	938.204	991.076
Tb427_100154300		764.336	881.03	1006.22
Tb427_100079300		763.827	1250.67	1313.17
Tb427_070014200		762.946	935.467	947.953
Tb427_100079200		762.107	1291.6	1331.08
Tb427_100014700		761.366	934.543	995.589
Tb427_090027000		758.244	719.953	767.476
Tb427_110105400		756.41	892.736	927.172
Tb427_100005300		755.472	937.828	938.201
Tb427_110134900		747.161	897.499	984.447
Tb427_110157800:pseudogene		744.114	859.622	875.205
Tb427_090089500		738.915	910.555	926.604
Tb427_080079900		735.536	715.814	631.526
Tb427_110182400		733.737	836.811	880.571
Tb427_090065100		733.452	933.703	980.507
Tb427_080040100		731.689	897.993	977.365
Tb427_030030200		730.287	458.363	493.798
Tb427_040029800		728.542	795.518	737
Tb427_110049700		727.458	894.127	860.485
Tb427_110068000		724.843	883.549	920.835
Tb427_090088400		721.661	868.794	933.099
Tb427_110134800		718.935	857.545	919.334
Tb427_070028300		711.629	809.473	847.41
Tb427_090061600		700.255	628.313	632.66
Tb427_090044800		700.014	731.072	630.958
Tb427_090088600		697.184	878.277	922.597
Tb427_100057500		696.289	881.153	904.652
Tb427_010019700		693.647	618.53	704.088
Tb427_100018900		691.12	824.471	870.685
Tb427_070017600		688.898	746.197	839.732
Tb427_110025500		686.976	818.42	886.532
Tb427_010019500		683.184	624.092	713.788
Tb427_010019600		681.581	616.999	706.712
Tb427_100149700:pseudogene		680.749	830.386	830.103
Tb427_110048100		680.48	845.27	807.98
Tb427_010019400		677.784	612.163	698.523
Tb427_090088500		676.886	829.004	898.328
Tb427_060045100		676.668	822.876	608.458
Tb427_110023600		676.555	474.601	551.658
Tb427_100044400		672.347	630.914	602.645
Tb427_080005000		671.143	201.058	177.271
Tb427_090045400		666.71	808.723	870.773
Tb427_110025300		663.555	804.92	876.213
Tb427_070017400		651.62	774.963	800.598
Tb427_110104200		647.45	789.374	864.226
Tb427_040053500		647.118	694.705	367.48
Tb427_080022800		646.946	732.721	721.954
Tb427_110103900		646.366	794.922	859.265
Tb427_110167900		642.922	648.03	623.613
Tb427_070055900		642.637	822.866	894.082
Tb427_040022700		636.82	730.419	599.834
Tb427_040020300		635.963	744.657	818.341
Tb427_070055700		631.114	791.913	853.672
Tb427_030009400		628.304	522.899	481.693
Tb427_110070100		626.714	637.783	719.306
Tb427_070014100		620.939	747.107	777.07
Tb427_110149700		620.615	610.962	582.368
Tb427_070057400		618.623	706.026	744.586
Tb427_090031800		614.89	707.163	681.721
Tb427_100068100		612.702	709.156	741.782
Tb427_110147700		610.063	604.161	576.87
Tb427_080073900		610.008	514.382	500.343
Tb427_090052000		599.231	769.504	822.955
Tb427_070053300		594.231	773.783	714.751
Tb427_040038500		591.162	651.884	591.155
Tb427_040038700		585.933	662.161	596.833
Tb427_110178000		584.118	639.021	577.54
Tb427_110103300		574.34	615.341	598.462
Tb427_090029000		572.791	595.984	612.369
Tb427_050016400		570.645	404.807	384.83
Tb427_000019500:pseudogene		567.453	2.42852	1.19774
Tb427_110147100		566.368	616.061	578.843
Tb427_100155900		566.026	609.66	537.612
Tb427_070014300		565.086	661.999	683.319
Tb427_040012900		562.486	667.674	697.741
Tb427_110147200		558.378	623.477	597.309
Tb427_100112400		556.608	501.22	556.247
Tb427_070026500		553.583	596.293	540.338
Tb427_110081800		552.658	528.597	485.062
Tb427_050013400:pseudogene		549.788	369.211	346.937
Tb427_110011500		549.533	597.113	475.546
Tb427_110023300		549.112	530.353	528.702
Tb427_100111500		544.301	499.977	558.793
Tb427_090045500		543.298	635.744	665.931
Tb427_110136200		539.456	727.44	545.339
Tb427_090058900		521.674	449.203	439.848
Tb427_070063700		521.501	558.608	563.463
Tb427_010006500		518.652	440.984	429.258
Tb427_110060300		517.88	593.597	634.247
Tb427_060025400		516.712	640.454	564.797
Tb427_020026400		516.535	493.429	497.343
Tb427_100167200		515.865	536.983	535.341
Tb427_110136400		515.732	710.531	508.751
Tb427_060043400		513.558	541.816	474.225
Tb427_090064500		511.782	523.473	486.524
Tb427_060050100		509.169	537.854	504.007
Tb427_110131800		509.143	582.487	538.223
Tb427_050011000		508.753	356.309	295.066
Tb427_030023900		504.953	352.76	378.159
Tb427_060009000		500.459	456.44	439.92
Tb427_100064800		498.637	453.47	528.446
Tb427_100064600		498.535	509.919	395.979
Tb427_090032000		497.531	570.645	534.382
Tb427_090026000		495.203	1010.04	766.023
Tb427_110147300		494.234	543.913	523.089
Tb427_080007800		493.308	561.038	457.317
Tb427_100062200		492.421	503.443	462.006
Tb427_100112200		492.072	446.93	505.525
Tb427_110031000		491.642	521.543	486.761
Tb427_010027100		490.984	752.635	703.726
Tb427_080056500		489.806	449.113	472.276
Tb427_080040300		488.685	647.939	693.801
Tb427_100112300		485.868	435.748	491.006
Tb427_100112100		484.968	439.38	498.36
Tb427_100073300		484.909	520.278	517.884
Tb427_070046000		484.414	584.158	642.886
Tb427_100112600		483.667	439.475	485.632
Tb427_000019400		483.619	4.46451	9.78614
Tb427_100005400		480.987	515.274	488.288
Tb427_050038600		478.893	366.935	313.214
Tb427_050020400		478.849	365.838	305.941
Tb427_070050100		478.01	532.12	513.292
Tb427_110081200		477.456	465.842	446.374
Tb427_110022600		476.624	370.022	383.389
Tb427_030037700		473.2	351.374	310.48
Tb427_110147000		472.903	534.625	525.078
Tb427_100157100		472.673	462.317	423.767
Tb427_000020000		471.851	0.471638	0.23261
Tb427_110025400		468.844	553.883	624.855
Tb427_100112500		468.559	430.778	500.905
Tb427_000019900		468.265	4.99025	3.78998
Tb427_100112000		468.159	427.623	475.167
Tb427_050025600		465.755	358.117	332.973
Tb427_090050100		462.817	462.226	412.128
Tb427_070021600		461.369	579.494	611.68
Tb427_050016800		457.976	510.704	517.482
Tb427_030022000		452.325	384.562	414.324
Tb427_100111400		448.948	387.671	454.708
Tb427_030040300		448.034	366.363	352.771
Tb427_000018600		446.892	6.6714	6.93406
Tb427_100112700		445.746	392.259	460.271
Tb427_100069700		444.86	433.459	428.545
Tb427_050035900		444.083	264.838	265.971
Tb427_100069500		441.586	427.608	424.401
Tb427_110023800		440.368	438.174	424.956
Tb427_040033100		436.922	498.2	519.307
Tb427_110022700		435.36	356.017	335.916
Tb427_110129000		433.224	381.264	423.47
Tb427_090051000		431.5	468.488	467.127
Tb427_110136500		430.657	607.572	421.95
Tb427_100111800		430.238	382.797	423.314
Tb427_100134500		430.125	427.511	449.535
Tb427_100111300		429.838	403.824	448.675
Tb427_090066100		428.711	487.085	437.8
Tb427_080068100		426.885	417.417	402.56
Tb427_100111600		426.135	395.509	464.891
Tb427_100111700		422.934	366.357	423.879
Tb427_080009100		421.631	420.91	419.668
Tb427_000019200	BES3 ESAG6	419.829	9.26143	13.7431
Tb427_110067200		413.382	416.424	361.646
Tb427_110037500		413.373	475.916	460.272
Tb427_100111900		411.928	382.51	426.896
Tb427_060056200		409.119	520.524	496.278
Tb427_080021500		407.63	394.385	373.358
Tb427_090053900		407.503	372.085	351.567
Tb427_090074600		407.109	425.335	418.18
Tb427_030046200		404.342	291.467	274.825
Tb427_110086200		403.522	464.498	486.087
Tb427_030018100		402.941	395.428	377.72
Tb427_110073700		399.83	399.192	373.843
Tb427_090034500		399.292	383.218	385.106
Tb427_030056900		395.573	275.427	252.262
Tb427_070017200		395.569	435.049	427.185
Tb427_110129100		394.557	350.201	384.429
Tb427_110005500		394.397	408.596	393.766
Tb427_090034800		391.38	392.448	406.028
Tb427_080007500		389.1	382.935	322.811
Tb427_020011600		387.211	439.933	408.316
Tb427_070021900		387.204	480.156	528.249
Tb427_030046100		387.019	282.296	268.289
Tb427_070005900		386.478	441.782	465.785
Tb427_030008300		385.551	360.621	337.196
Tb427_090083100		383.796	379.327	405.222
Tb427_110128800		383.183	349.336	372.005
Tb427_110129300		382.551	345.159	380.454
Tb427_030046000		380.925	279.568	255.378
Tb427_070073700		380.836	361.596	359.72
Tb427_100112800		379.21	330.801	384.753
Tb427_110129500		379.201	344.951	378.729
Tb427_090039900		379.065	413.922	388.243
Tb427_110096300		377.165	383.556	379.43
Tb427_100042900		377.08	416.965	454.164
Tb427_100135700		376.383	382.501	406.42
Tb427_050044700		376.185	261.377	261.72
Tb427_060049500		375.252	388.849	387.934
Tb427_050012900		375.218	227.73	252.056
Tb427_030046300		374.812	304.684	279.015
Tb427_110129400		374.379	336.599	374.058
Tb427_110128900		374.24	341.168	373.668
Tb427_070014900		373.492	415.206	360.556
Tb427_110129200		373.209	334.571	365.439
Tb427_100156200		371.512	458.218	428.117
Tb427_030046400		371.439	273.033	250.431
Tb427_070006000		370.171	438.667	458.205
Tb427_050051300		369.698	250.238	250.437
Tb427_110023500		368.848	329.205	303.834
Tb427_050049900		368.293	228.415	238.597
Tb427_110189900		363.997	360.637	342.244
Tb427_030042800		363.92	270.553	261.545
Tb427_090014800		363.835	346.382	311.039
Tb427_050048600		363.479	253.544	239.336
Tb427_050023900		361.166	259.425	260.85
Tb427_110187400		360.819	375.557	379.636
Tb427_100008600		359.368	392.624	351.86
Tb427_100086000		359.035	354.186	347.205
Tb427_050050100		357.546	244.883	251.466
Tb427_110125400		355.353	364.091	348.82
Tb427_050048900		355.195	233.654	259.166
Tb427_070040800		355.047	358.426	321.678
Tb427_050049600		353.964	227.666	238.914
Tb427_100108100		353.729	367.868	352.337
Tb427_050049100		353.516	242.316	246.297
Tb427_050049000		353.068	238.894	239.863
Tb427_070021700		352.262	436.509	483.355
Tb427_050050000		352.173	252.689	232.901
Tb427_110024600		351.891	354.769	331.576
Tb427_080049200		351.552	395.292	373.996
Tb427_070021800		350.959	434.065	483.18
Tb427_040052100:pseudogene		349.745	491.385	574.057
Tb427_050048800		349.15	229.591	239.652
Tb427_050049200		347.471	228.415	247.458
Tb427_050049400		346.576	252.475	249.145
Tb427_050049700		346.576	240.391	242.922
Tb427_090049100		346.357	314.334	339.062
Tb427_110038200		346.183	321.373	316.311
Tb427_080060100		344.406	341.6	334.54
Tb427_050049500		344.337	244.027	238.07
Tb427_090066200		343.532	368.288	334.838
Tb427_050048500		343.105	235.472	249.884
Tb427_050044900		342.896	284.769	246.083
Tb427_030043600		342.849	457.68	369.138
Tb427_030043800		342.83	454.582	370.086
Tb427_050048700		342.21	232.585	245.454
Tb427_050012800		342.073	245.265	257.189
Tb427_050049800		340.979	223.175	241.234
Tb427_000020100		340.852	0.198782	0
Tb427_050049300		340.419	248.839	238.492
Tb427_110133400		339.871	336.187	313.979
Tb427_060042300		339.48	358.534	344.378
Tb427_080025900		339.414	336.814	295.423
Tb427_070078000		339.114	372.408	390.332
Tb427_080018400		334.646	355.05	332.391
Tb427_110049600		334.301	431.929	402.849
Tb427_060042400		332.71	358.107	341.61
Tb427_040052000		332.441	512.595	515.666
Tb427_070076100		331.561	287.587	361.212
Tb427_110012300		330.95	346.065	313.772
Tb427_110069400		329.902	252.37	229.461
Tb427_100068400:pseudogene		326.278	330.282	326.702
Tb427_000019600:pseudogene		325.77	0.874721	1.4895
Tb427_040027000		325.178	345.486	329.565
Tb427_100149800		324.678	353.581	312.105
Tb427_090049800		323.683	341.949	333.679
Tb427_110160400		322.805	332.411	323.184
Tb427_100080100		321.582	404.35	413.992
Tb427_030038600		317.583	211.503	214.337
Tb427_100149900		316.834	321.784	272.382
Tb427_100155300		314.399	372.507	342.746
Tb427_070010500		313.413	327.086	316.96
Tb427_080055300		313.302	299.485	292.45
Tb427_030044000		312.813	95.7669	99.9543
Tb427_080055200		312.775	292.889	289.525
Tb427_110011700		312.599	326.982	275.353
Tb427_030016500		312.106	232.736	193.147
Tb427_110023400		311.512	319.501	303.388
Tb427_110018200		311.04	387.13	364.662
Tb427_030029600		309.991	227.481	188.56
Tb427_050024400		309.346	194.933	182.95
Tb427_030022800		307.748	222.792	213.673
Tb427_110051900		307.391	332.554	365.451
Tb427_090049700		305.868	340.23	323.393
Tb427_100145300		304.7	302.243	279.106
Tb427_100076900		302.528	267.296	251.165
Tb427_110079200		302.128	334.666	282.319
Tb427_100015000		301.879	321.058	294.371
Tb427_080026200		301.568	345.714	259.365
Tb427_050005600		301.445	203.145	152.44
Tb427_080036000		301.29	321.998	303.655
Tb427_100088800		300.645	321.807	322.082
Tb427_080055000		300.152	284.066	275.875
Tb427_100160500		298.981	297.088	281.837
Tb427_070066900		297.919	282.766	258.534
Tb427_100023700:pseudogene		297.915	264.841	306.628
Tb427_080055400		297.612	283.904	280.786
Tb427_060041400		296.605	275.061	267.844
Tb427_110158700		296.101	278.478	273.891
Tb427_070053500		295.752	304.082	325.365
Tb427_070039700		295.347	307.44	283.21
Tb427_100046100		295.011	338.3	311.917
Tb427_070029600		294.951	328.205	255.394
Tb427_030013500		294.441	232.273	246.302
Tb427_060043000		293.584	307.207	303.513
Tb427_040022600		292.458	352.404	300.156
Tb427_110164300		289.405	251.118	188.422
Tb427_050024300		288.635	189.614	180.642
Tb427_010026900		288.477	467.157	485.963
Tb427_050025100		288.419	201.516	186.746
Tb427_050038700		287.849	222.728	207.107
Tb427_110066200		286.116	336.35	312.97
Tb427_110070500		285.509	208.138	213.011
Tb427_050051600		283.317	200.193	201.155
Tb427_110087200		282.468	312.339	296.35
Tb427_080065400		281.871	369.142	383.108
Tb427_030007100		280.184	188.55	185.553
Tb427_070031000		279.467	269.842	231.079
Tb427_060055700		279.028	309.868	261.094
Tb427_110104400		278.503	312.553	291.932
Tb427_050032100		278.358	215.731	202.173
Tb427_110152700		278.214	294.892	289.604
Tb427_050022900		277.452	235.782	205.461
Tb427_080023800		276.734	314.757	269.89
Tb427_030050200		276.724	215.235	217.753
Tb427_050037700		276.308	181.769	184.807
Tb427_110150300		276.223	248.186	247.639
Tb427_110011800		274.422	301.395	280.168
Tb427_080070000		274.123	296.301	254.781
Tb427_050024600		273.468	178.257	165.629
Tb427_080027800		273.334	264.328	232.098
Tb427_020022600		272.603	290.27	257.541
Tb427_070027000		272.429	324.53	304.379
Tb427_090050700		272.297	330.97	326.523
Tb427_080069600		271.672	377.249	403.053
Tb427_070047000		268.392	403.839	342.677
Tb427_110009700		268.292	294.804	278.168
Tb427_030054400		268.282	177.964	177.309
Tb427_020021800		267.792	285.857	259.741
Tb427_050052200		267.646	198.45	149.884
Tb427_090058400		267.617	303.637	268.081
Tb427_090031700		264.394	267.935	239.439
Tb427_030058700		264.246	184.663	175.106
Tb427_010016700		264.056	260.78	242.626
Tb427_050013700		261.969	182.636	181.538
Tb427_090055900		260.875	264.32	244.263
Tb427_100015200		259.776	324.34	226.955
Tb427_110132400		259.579	263.569	243.205
Tb427_040025600		259.13	263.707	230.853
Tb427_100027900		258.193	304.536	242.939
Tb427_100117400		257.917	279.851	280.684
Tb427_070046100		257.427	267.603	294.249
Tb427_100116700		257.285	223.21	251.666
Tb427_080011900		256.672	278.796	271.794
Tb427_110023100		256.652	261.399	237.894
Tb427_090055600		256.571	257.73	224.351
Tb427_110166800		256.17	248.412	255.558
Tb427_080064200		256.057	273.883	276.869
Tb427_080023700		255.804	239.447	219.676
Tb427_100116100		255.746	226.167	249.414
Tb427_030034700		255.391	188.507	193.673
Tb427_050037400		254.834	231.999	229.26
Tb427_100170800		254.203	228.979	240.754
Tb427_070082200		253.307	287.752	313.7
Tb427_060013500		253.034	217.018	220.079
Tb427_040014600		252.79	243.727	200.813
Tb427_100116300		252.554	230.303	249.852
Tb427_100116400		252.314	225.309	245.152
Tb427_100116900		252.314	224.589	250.653
Tb427_080054000		251.366	444.942	324.104
Tb427_060026000		250.816	282.944	263.807
Tb427_090056700		250.718	260.906	249.61
Tb427_100116800		250.662	221.066	250.955
Tb427_030033600		250.624	164.936	151.202
Tb427_110107600		250.48	232.059	239.787
Tb427_100064700		250.383	227.07	238.236
Tb427_100116600		249.956	226.351	249.172
Tb427_050052400		249.839	162.949	163.737
Tb427_110150600		249.491	284.749	299.01
Tb427_070050200		249.374	248.183	257.336
Tb427_060013700		248.361	221.159	209.882
Tb427_050029400		248.277	174.581	151.39
Tb427_090058100		248.142	262.765	228.491
Tb427_100026100		248.082	244.616	227.855
Tb427_050022400		247.517	164.416	172.858
Tb427_100116500		246.845	220.56	241.843
Tb427_080056000		245.199	243.712	214.616
Tb427_030018900		244.962	198.926	162.99
Tb427_080060000		244.387	274.989	265.738
Tb427_090034600		244.105	233.273	242.418
Tb427_110128000		243.961	312.361	312.709
Tb427_100170600		243.429	199.48	267.939
Tb427_100136100		243.084	245.938	228.516
Tb427_110031400		242.56	247.681	268.515
Tb427_100111200		242.534	217.253	259.551
Tb427_050026200		242.509	149.752	134.477
Tb427_050015600		242.293	173.429	172.96
Tb427_070069900		241.401	258.635	242.917
Tb427_090052600		241.3	247.745	242.007
Tb427_040021600		241.034	280.457	252.797
Tb427_110138800		241.032	226.885	222.448
Tb427_050051800		240.91	167.467	177.013
Tb427_100134400		240.772	247.813	234.603
Tb427_100101500		240.751	258.126	240.635
Tb427_030021500		240.528	180.926	183.621
Tb427_100130700		240.494	282.569	265.132
Tb427_100026600		240.426	248.173	208.223
Tb427_060014000		240.145	208.69	208.312
Tb427_050023200		240.052	189.617	150.984
Tb427_040046900		239.892	210.891	228.272
Tb427_050040500		239.789	151.645	148.56
Tb427_060048800		239.728	236.375	236.08
Tb427_110009200		239.341	227.501	212.244
Tb427_050010800		239.039	164.928	120.815
Tb427_110172800		238.474	262.725	247.617
Tb427_000019300		237.76	2.32336	4.14993
Tb427_060033000		237.397	287.851	299.675
Tb427_100116200		237.078	209.928	237.914
Tb427_020025500		236.859	247.783	231.195
Tb427_030057200		236.711	162.248	125.298
Tb427_060013000		236.479	206.742	207.803
Tb427_100078900		236.136	256.737	212.516
Tb427_060013600		236.027	208.634	202.536
Tb427_020021900		235.588	291.555	273.663
Tb427_100090500		235.233	224.86	226.092
Tb427_110063500		234.759	265.791	214.427
Tb427_070015100:pseudogene		234.125	261.107	266.712
Tb427_070036600		233.944	256.588	231.491
Tb427_060014200		233.788	209.29	208.194
Tb427_050010100		233.773	174.158	170.848
Tb427_030006100		233.282	168.735	164.574
Tb427_090029800		232.526	241.144	227.037
Tb427_100050500		232.298	245.143	230.522
Tb427_090006700		231.252	256.198	280.461
Tb427_110079500		230.917	230.011	202.788
Tb427_060009300		230.351	289.213	264.509
Tb427_080072900		230.328	230.825	229.892
Tb427_090069900		230.011	265.557	248.339
Tb427_070019000		229.383	250.242	220.023
Tb427_100032100		229.225	255.659	245.338
Tb427_110021800		229.184	248.046	269.787
Tb427_070075300		229.17	211.275	227.283
Tb427_110063600		229.119	218.481	213.477
Tb427_100124600		229.074	283.004	272.875
Tb427_110012700		228.115	261.113	251.594
Tb427_090081800		227.793	235.663	221.862
Tb427_030059000		227.17	145.807	155.866
Tb427_110070900		226.407	206.492	240.705
Tb427_100144100		226.265	220.809	235.42
Tb427_060013200		224.546	194.289	195.496
Tb427_050053700		223.612	121.124	103.818
Tb427_060032100		223.266	273.737	217.112
Tb427_100099100		223.209	206.588	202.613
Tb427_080020300		222.959	290.317	268.043
Tb427_030039700		222.212	145.325	147.364
Tb427_100071700		221.579	241.358	223.007
Tb427_100041700		221.008	233.98	263.492
Tb427_070039400		220.773	257.556	263.356
Tb427_070009500		220.437	198.524	199.197
Tb427_100089600		220.296	244.053	240.474
Tb427_100041200		219.828	205.316	213.15
Tb427_090064200		219.676	216.695	244.957
Tb427_100051500		219.059	239.299	227.72
Tb427_080048200		219.039	239.303	228.388
Tb427_100156700		218.416	275.974	249.77
Tb427_050037500		218.366	138.035	125.628
Tb427_100124700:pseudogene		218.312	252.598	168.302
Tb427_090080200		218.049	214.57	202.012
Tb427_090077100		217.839	214.784	208.26
Tb427_060014100		217.608	183.513	185.727
Tb427_090073400		217.353	217.126	223.994
Tb427_110082200		217.263	217.226	202.033
Tb427_050044800		217.163	171.26	156.685
Tb427_100006300		217.158	243.942	241.542
Tb427_100071000		216.955	208.781	224.228
Tb427_030016600		216.29	183.904	166.954
Tb427_010016800		216.21	226.146	203.237
Tb427_050036100		215.9	133.681	142.185
Tb427_050052700:pseudogene		215.479	175.834	163.534
Tb427_100156600		214.929	276.149	252.053
Tb427_020013800		214.908	217.382	235.393
Tb427_060013900		214.869	185.793	193.113
Tb427_070069300		214.819	224.83	207.567
Tb427_090073100		214.334	222.41	222.728
Tb427_060013800		213.286	181.736	186.2
Tb427_070051200		213.176	250.101	236.283
Tb427_090083000		212.678	215.723	224.857
Tb427_060036100		212.666	216.803	198.288
Tb427_010020700		212.477	215.307	216.601
Tb427_100150000		212.399	209.764	188.905
Tb427_060048300		211.823	237.179	220.715
Tb427_110075000		211.582	243.447	226.216
Tb427_090082000		211.544	215.715	228.091
Tb427_030010100		211.512	169.619	156.776
Tb427_030007500		211.303	173.988	168.353
Tb427_050034200		211.299	127.568	141.316
Tb427_100008400		211.059	239.978	244.79
Tb427_050023100		210.596	153.094	153.578
Tb427_090086100		210.479	238.047	220.496
Tb427_100153300		210.069	210.162	207.839
Tb427_100091200		209.958	128.583	125.018
Tb427_070009100		209.794	236.956	235.616
Tb427_080059800		209.45	232.383	224.357
Tb427_060013100:pseudogene		209.341	179	181.631
Tb427_030012200		209.232	130.241	137.368
Tb427_090066800		208.884	218.994	208.127
Tb427_030038400		208.777	149.755	143.286
Tb427_080024100		208.621	230.844	219.681
Tb427_030052200		208.579	136.806	125.747
Tb427_060013400		208.487	188.793	188.568
Tb427_100081800		208.09	217.444	235.509
Tb427_070050400		207.787	201.249	205.479
Tb427_050008000		207.655	149.084	130.831
Tb427_110187100		207.534	229.409	248.263
Tb427_070037200		207.455	205.609	187.827
Tb427_040009400		207.384	234.726	233.429
Tb427_100005100		207.369	221.133	231.366
Tb427_110104700		207.348	225.169	212.338
Tb427_110057900		207.313	233.164	240.018
Tb427_050008100		207.181	151.949	133.149
Tb427_070039800		207.147	204.273	200.841
Tb427_100156500		207.11	257.599	230.054
Tb427_070030400		207.083	241.843	228.023
Tb427_100091700		206.832	132.92	130.143
Tb427_080042500		206.713	259.48	233.321
Tb427_110155500		206.582	242.832	240.657
Tb427_100148500		206.578	215.05	188.781
Tb427_090073700		206.179	203.673	210.87
Tb427_050044000		206.048	133.038	140.487
Tb427_100156400		206.041	203.063	185.941
Tb427_060013300		205.221	177.512	180.045
Tb427_030054100		204.585	151.61	145.445
Tb427_100037100		204.357	270.186	323.038
Tb427_100051700		204.35	212.499	204.566
Tb427_100028700		204.343	115.266	145.93
Tb427_100064500		204.317	237.207	210.437
Tb427_050050700		204.194	131.253	122.629
Tb427_020019500		204.007	212.827	234.52
Tb427_100065000		202.967	213.787	221.498
Tb427_030050600		202.606	153.919	135.805
Tb427_110167200		202.54	211.829	192.079
Tb427_090074300		202.344	196.788	208.689
Tb427_110153400		201.7	195.398	143.05
Tb427_060029100		201.132	215.11	199.333
Tb427_040050500		201.126	191.849	213.031
Tb427_050035000		200.964	138.242	123.162
Tb427_060031100		200.921	217.66	218.842
Tb427_090052300		200.84	160.96	159.674
Tb427_110093600		200.729	174.636	183.815
Tb427_030030900		199.509	128.205	130.261
Tb427_100146700		199.061	326.006	274.995
Tb427_110018800		199.023	178.23	187.208
Tb427_020031600		198.631	232.346	188.885
Tb427_100160100		198.628	263.1	258.072
Tb427_080088400		198.578	177.728	165.333
Tb427_100145200		198.54	199.386	203.99
Tb427_080045900		198.522	180.785	151.736
Tb427_110138000		198.378	183.361	137.812
Tb427_080053300		197.415	208.382	194.209
Tb427_080088800		197.211	192.2	182.87
Tb427_040006200		197.162	231.003	198.234
Tb427_110042100		196.65	171.751	166.128
Tb427_030027100		196.637	139.677	127.987
Tb427_090074000		196.614	199.041	205.574
Tb427_050014200		196.364	177.506	148.576
Tb427_100081000		195.962	251.533	213.566
Tb427_100053900		195.714	175.731	199.78
Tb427_020005200		195.707	263.927	258.876
Tb427_030009900		195.517	144.396	126.726
Tb427_110035300		194.993	200.611	188.034
Tb427_010015900		194.887	144.851	166.314
Tb427_090029200		194.792	184.751	210.526
Tb427_060010400		194.685	197.693	183.303
Tb427_110023700		194.661	211.716	220.238
Tb427_060016200		194.603	209.331	204.902
Tb427_080022900		194.184	201.185	176.29
Tb427_040022300		193.753	213.395	198.605
Tb427_080006700		193.729	184.045	180.899
Tb427_060017600		193.064	233.609	215.592
Tb427_080022300		192.748	402.947	327.852
Tb427_100110600		192.527	220.063	210.521
Tb427_090065900		192.335	233.133	204.068
Tb427_050007900		192.185	137.356	120.889
Tb427_100102600		192.081	198.239	189.639
Tb427_050046900		191.168	132.368	93.4369
Tb427_100127500		191.028	184.209	178.669
Tb427_100105100		190.918	223.119	207.812
Tb427_090082200		190.538	199.662	195.199
Tb427_050043600		190.494	136.484	120.471
Tb427_100077400		190.247	314.871	273.278
Tb427_070075900		190.141	167.393	183
Tb427_070032900		189.777	176.728	210.625
Tb427_030058400		189.699	137.088	125.82
Tb427_080045400		189.596	185.552	151.031
Tb427_100146000		189.55	197.454	188.823
Tb427_070033100		189.359	187.129	207.784
Tb427_080012300		189.257	210.199	181.747
Tb427_110160900		189.056	194.642	190.315
Tb427_100136800		188.389	197.775	175.253
Tb427_060054500		188.37	180.973	191.574
Tb427_060045000		188.248	213.161	192.965
Tb427_100071200		188.168	216.353	195.653
Tb427_060051100		187.68	211.169	180.303
Tb427_000012500		187.312	5.81828	8.02803
Tb427_110010200		186.979	215.894	238.96
Tb427_100087000		186.852	212.518	245.123
Tb427_100161900		186.822	207.164	201.504
Tb427_070032300		186.457	224.797	222.28
Tb427_070022200		186.361	310.652	291.122
Tb427_080047100		186.203	197.563	172.955
Tb427_070034300		186.009	188.009	213.071
Tb427_110150100		186.006	186.993	169.671
Tb427_030042500		185.933	134.737	111.243
Tb427_070006600		185.846	176.036	169.386
Tb427_080023200		185.803	201.908	194.238
Tb427_100037000		185.732	202.248	212.255
Tb427_030033000		185.724	98.3566	114.348
Tb427_030053500		185.679	141.687	108.183
Tb427_050053000		185.602	154.57	162.977
Tb427_100029600		185.463	199.64	194.344
Tb427_010023000		185.28	169.305	181.254
Tb427_040022800		184.836	194.889	159.803
Tb427_020023200		184.736	191.13	211.549
Tb427_110014900		184.691	189.203	197.697
Tb427_070033400		184.669	175.448	211.729
Tb427_100094000		184.052	173.158	164.785
Tb427_100017200:pseudogene		184.019	193.175	176.61
Tb427_060032500		183.98	232.623	225.777
Tb427_100156100		183.836	209.075	197.745
Tb427_070049600		183.815	218.682	192.209
Tb427_100161200		183.459	184.097	164.911
Tb427_110143500		183.378	203.064	177.608
Tb427_100051200		183.358	206.618	189.448
Tb427_050053500		183.256	112.28	98.6668
Tb427_100132500		183.232	128.14	155.327
Tb427_080081900		183.219	158.2	163.263
Tb427_080070100		183.21	190.17	171.201
Tb427_050018300		183.176	139.495	105.359
Tb427_070033200		183.161	180.808	221.278
Tb427_030057000		183.14	134.293	97.1885
Tb427_100048500		183.003	188.255	181.482
Tb427_030026600		182.983	144.76	143.82
Tb427_070034500		182.575	180.808	217.017
Tb427_070033000		182.407	177.208	211.493
Tb427_040005500		182.389	190.719	173.414
Tb427_100005700		182.319	203.198	201.598
Tb427_100168800		182.225	205.294	172.621
Tb427_030038900		182.024	118.627	127.077
Tb427_050022100		181.677	122.788	125.778
Tb427_110042200		181.576	181.393	175.374
Tb427_050013600		181.534	124.852	131.575
Tb427_070033700		181.402	177.768	213.15
Tb427_070015000		181.374	193.439	197.314
Tb427_050010300		181.342	140.491	130.09
Tb427_030059300		181.132	127.169	116.916
Tb427_110052400		181.094	195.597	144.537
Tb427_070034400		181.067	176.888	198.235
Tb427_110133300		181.018	212.888	245.753
Tb427_070034200		180.984	182.088	216.464
Tb427_110122100		180.9	176.426	164.909
Tb427_110142600		180.766	172.468	173.057
Tb427_070033500		180.565	184.169	211.729
Tb427_090084600		180.51	170.902	142.645
Tb427_050041000		180.108	142.002	141.301
Tb427_090068900		180.105	185.212	183.358
Tb427_040015000		179.573	199.668	183.658
Tb427_050014300		179.487	112.602	104.538
Tb427_110130800		179.409	201.412	196.33
Tb427_070032800		179.309	175.688	217.332
Tb427_110145300		179.305	193.67	189.041
Tb427_100091600		179.101	113.446	104.578
Tb427_100024300		178.91	197.606	166.195
Tb427_090054400		178.74	187.401	173.629
Tb427_080059900		178.68	178.462	184.661
Tb427_110053700		178.455	174.635	167.309
Tb427_070033900		178.387	193.289	208.178
Tb427_100016900		177.965	228.879	225.493
Tb427_100145900		177.793	177.489	172.479
Tb427_100091500		177.731	114.694	108.573
Tb427_060045200		177.73	192.087	189.076
Tb427_090032200		177.225	186.819	183.507
Tb427_100153200		177.167	160.545	149.732
Tb427_060018300		177.091	186.727	166.554
Tb427_110029900		177.064	208.831	229.77
Tb427_070034000		176.964	184.569	209.046
Tb427_050044600		176.763	109.342	102.034
Tb427_100091400		176.682	109.723	111.963
Tb427_030024500		176.271	158.351	127.843
Tb427_020011800		176.054	143.921	126.405
Tb427_070034600		175.875	176.248	216.701
Tb427_070006300		175.841	179.271	163.077
Tb427_100091300		175.825	110.848	107.282
Tb427_040043100		175.725	205.168	190.535
Tb427_070005500		175.609	209.319	215.882
Tb427_110070700		175.562	151.225	144.329
Tb427_100087200		175.426	170.636	171.375
Tb427_110076600		175.341	193.621	182.264
Tb427_070032700		175.205	175.528	213.781
Tb427_100017800		175.041	172.513	175.299
Tb427_070033600		175.037	186.809	209.914
Tb427_040037300		174.903	220.142	195.006
Tb427_090044700		174.788	175.946	140.152
Tb427_070044800		174.77	191.156	189.646
Tb427_010030100		174.757	157.076	168.732
Tb427_050011800		174.425	125.572	127.548
Tb427_110063300		174.407	194.16	213.774
Tb427_030051800		174.289	120.65	120.507
Tb427_050035800		174.135	147.568	147.398
Tb427_070033300		173.697	177.208	214.807
Tb427_110038900		173.386	191.675	149.082
Tb427_030045000		173.339	129.088	103.567
Tb427_050013500		173.019	125.539	131.124
Tb427_080063300:pseudogene		172.906	198.33	142.907
Tb427_110007100		172.824	168.061	178.418
Tb427_040012700		172.665	179.454	182.435
Tb427_090064700		172.597	168.167	168.334
Tb427_090088100		172.112	168.144	170.844
Tb427_080050100		171.626	180.635	153.698
Tb427_100148300		171.567	173.134	171.26
Tb427_040006000		171.377	196.147	173.918
Tb427_100031000		171.299	172.625	158.335
Tb427_030014700		171.227	92.6724	97.1302
Tb427_030059100		170.816	144.201	148.67
Tb427_070048000		170.625	171.822	154.861
Tb427_110107500		170.61	173.603	157.452
Tb427_100083400		170.573	182.653	184.541
Tb427_070026600		170.309	183.335	184.077
Tb427_090029300		170.259	169.631	173.645
Tb427_000018900:pseudogene		169.988	1.19308	0.991028
Tb427_080017800		169.869	156.85	158.736
Tb427_070034100		169.845	182.088	208.731
Tb427_070054700		169.685	174.238	183.183
Tb427_110042700		169.594	177.158	181.85
Tb427_100144500		169.474	176.279	157.979
Tb427_100083700		169.42	184.933	155.476
Tb427_110011000		169.334	178.27	186.764
Tb427_100061800		169.333	187.494	189.295
Tb427_090061000		169.248	221.287	188.511
Tb427_010020800		168.999	181.335	153.635
Tb427_100106900		168.598	185.369	173.836
Tb427_080029600		168.437	181.144	180.898
Tb427_100128300		168.337	195.978	180.564
Tb427_110005200		168.309	174.649	197.333
Tb427_100018700		167.884	184.153	165.98
Tb427_070057300		167.866	170.708	157.806
Tb427_020022000		167.842	205.708	204.068
Tb427_100031800		167.677	173.833	176.235
Tb427_030017600		167.585	131.494	142.526
Tb427_080086000		167.398	170.816	153.028
Tb427_070076500		167.022	191.995	204.089
Tb427_100135400		166.884	152.187	139.4
Tb427_110168700		166.727	178.751	177.593
Tb427_080046800		166.718	174.04	149.15
Tb427_080010100		165.884	182.461	168.592
Tb427_110008500		165.671	157.856	147.447
Tb427_030031600		165.549	119.42	112.512
Tb427_020017500		165.337	167.887	157.734
Tb427_110040000		165.221	164.265	161.697
Tb427_090043300		165.042	166.081	152.806
Tb427_110175300		164.897	151.373	141.119
Tb427_030033900		164.578	135.158	130.243
Tb427_090049000		164.472	173.67	179.198
Tb427_110082700		164.458	178.538	165.74
Tb427_030029500		164.308	114.592	87.1084
Tb427_090019800		164.238	155.755	147.281
Tb427_050021000		164.226	131.399	126.567
Tb427_110105000		164.129	157.867	137.875
Tb427_110013700		164.023	113.823	122.464
Tb427_100070900		163.752	175.105	175.081
Tb427_100015400		163.693	164.243	149.74
Tb427_110095500		163.396	145.927	147.098
Tb427_080047700		163.262	184.041	185.542
Tb427_070037600		163.258	132.476	155.326
Tb427_090022800		163.148	184.146	180.917
Tb427_050007800		162.991	112.498	100.355
Tb427_030010800		162.805	115.755	112.063
Tb427_030037800		162.691	108.542	103.004
Tb427_070048300		162.575	180.89	147.112
Tb427_030043300		162.281	110.966	110.127
Tb427_100007300		162.132	166.832	148.653
Tb427_040037100		162.09	165.346	159.997
Tb427_050053100		162.084	115.72	103.127
Tb427_080023900		161.734	193.023	186.75
Tb427_100030800		161.685	179.076	149.922
Tb427_030043700		161.25	96.2613	111.662
Tb427_050051200		161.216	97.3232	95.514
Tb427_050048300		161.209	114.508	118.51
Tb427_110024700		161.192	185.822	177.559
Tb427_090038700		161.153	175.337	153.699
Tb427_030017300:pseudogene		161.06	112.64	118.454
Tb427_090055500		160.899	152.607	145.759
Tb427_090027200		160.872	124.669	136.67
Tb427_100072500		160.8	163.969	159.255
Tb427_070033800		160.297	160.967	194.368
Tb427_110054200		160.215	178.002	162.785
Tb427_080088300		159.921	163.979	154.78
Tb427_090044000		159.119	218.936	237.692
Tb427_060023000		159.106	157.869	149.1
Tb427_100143100:pseudogene		159.081	163.997	172.326
Tb427_070005800		158.954	145.449	141.82
Tb427_030015600		158.947	110.427	114.036
Tb427_070081200		158.779	158.094	182.654
Tb427_030043900		158.713	95.8545	120.29
Tb427_110068600		158.7	171.795	146.209
Tb427_080007300		158.632	136.895	159.347
Tb427_040036000		158.194	148.339	140.485
Tb427_100015300		158.142	166.003	128.828
Tb427_080035500		157.926	154.123	147.999
Tb427_110111000		157.911	178.671	175.276
Tb427_090055800		157.881	182.132	183.946
Tb427_070015200		157.649	149.132	169.915
Tb427_020030700		157.581	171.94	179.208
Tb427_000832000		157.354	66.3235	123.279
Tb427_110078400		157.354	178.785	172.422
Tb427_110131100		157.128	170.835	169.535
Tb427_040050400		156.626	162.395	170.991
Tb427_090084100		156.353	160.304	143.287
Tb427_070041600		156.172	160.048	144.82
Tb427_020005400		156.164	195.944	200.308
Tb427_040015600		156.114	167.57	139.245
Tb427_090056600		155.764	159.018	121.755
Tb427_000018700		155.728	1.93594	1.70859
Tb427_030053200:pseudogene		155.62	94.0683	96.636
Tb427_070017100		155.496	156.852	143.669
Tb427_110188500		155.495	177.883	174.179
Tb427_040007800		155.43	168.192	163.367
Tb427_050040000		155.402	125.629	129.536
Tb427_110159900		155.279	171.981	163.884
Tb427_060051900		154.571	157.435	145.262
Tb427_000666300		154.541	193.259	197.816
Tb427_030032500		154.294	106.719	94.4868
Tb427_110169500		154.119	153.973	117.832
Tb427_030009000		154.094	96.0034	103.42
Tb427_030057800		154.089	122.578	100.269
Tb427_110082300		153.998	156.247	151.737
Tb427_110020300		153.928	164.805	184.127
Tb427_050042100		153.911	121.593	98.533
Tb427_110059600		153.662	140.425	141.178
Tb427_010020200		153.47	147.908	147.264
Tb427_090060100		153.442	152.783	136.456
Tb427_050021500		153.375	88.0755	80.5992
Tb427_100053500:pseudogene		153.27	152.537	138.225
Tb427_030024800		153.15	108.644	107.53
Tb427_070028600		153.075	176.791	169.802
Tb427_050024700		153.001	84.3	89.2408
Tb427_070039000		152.962	167.291	157.365
Tb427_030015700		152.909	122.58	136.221
Tb427_100130300		152.817	160.585	156.023
Tb427_090053200		152.669	143.025	141.079
Tb427_110088900		152.634	163.579	147.552
Tb427_110043000		152.608	149.007	146.801
Tb427_010007800		152.571	166.665	164.516
Tb427_050025300		152.551	93.6868	88.6982
Tb427_100109300		152.325	144.179	135.067
Tb427_050014400		152.25	95.1688	99.619
Tb427_020015600		152.096	147.95	145.429
Tb427_110088100		152.024	144.922	126.618
Tb427_110075700		151.476	159.301	153.334
Tb427_100099700		151.462	173.528	174.047
Tb427_030030600		151.308	101.148	99.715
Tb427_030047900		151.103	108.218	89.007
Tb427_110180900		151.013	156.398	156.335
Tb427_050025700		150.986	101.423	102.374
Tb427_090024700		150.841	215.165	207.373
Tb427_030013800		150.727	101.824	101.594
Tb427_110159800		150.538	179.113	165.596
Tb427_060018100		150.528	141.044	138.662
Tb427_070047100		150.099	278.192	253.257
Tb427_080048700		150.074	186.258	164.527
Tb427_060049900		149.958	152.137	159.978
Tb427_030010400		149.808	112.977	105.436
Tb427_110102100		149.586	168.08	170.8
Tb427_030052500		149.512	107.791	100.741
Tb427_080006100		149.187	178.603	184.228
Tb427_030032000		148.951	97.8591	99.5945
Tb427_090046900		148.917	169.109	167.173
Tb427_050008400		148.825	102.951	81.3544
Tb427_110050400		148.442	145.627	137.342
Tb427_100150100		148.428	146.282	151.11
Tb427_060008300		148.259	160.317	212.7
Tb427_020023700		148.233	159.062	148.855
Tb427_030006000		148.036	113.477	112.359
Tb427_090056100		147.993	154.106	150.613
Tb427_000667300		147.918	178.688	194.79
Tb427_030031000		147.825	101.678	93.5366
Tb427_080085500		147.774	122.253	135.417
Tb427_040052500		147.771	138.063	158.236
Tb427_050017000		147.168	100.976	86.8132
Tb427_110088800		147.145	147.45	120.123
Tb427_080051400		147.011	136.153	120.391
Tb427_100145400		146.981	153.663	142.558
Tb427_110047200		146.919	167.081	151.222
Tb427_030020700		146.871	110.836	101.502
Tb427_020016900		146.669	169.382	154.807
Tb427_070082800		146.614	303.16	230.654
Tb427_050053300		146.512	108.519	104.857
Tb427_040009500		146.356	142.713	135.11
Tb427_010032600		146.314	134.007	97.5385
Tb427_070041500		146.301	149.551	155.331
Tb427_040050800		146.289	136.989	157.96
Tb427_010027700		146.287	185.555	196.004
Tb427_060046700		146.227	168.848	138.07
Tb427_100041000		145.672	152.571	130.571
Tb427_100052500		145.669	135.872	139.026
Tb427_040033000:pseudogene		145.66	151.768	144.653
Tb427_110026200		145.496	162.878	156.432
Tb427_040024500		145.427	136.019	134.568
Tb427_090053700		145.192	136.055	123.623
Tb427_080018000		144.869	138.191	139.003
Tb427_040018700		144.76	174.772	148.931
Tb427_080017400		144.725	148.632	157.004
Tb427_110028900		144.606	145.388	125.556
Tb427_070047700		144.593	148.972	130.965
Tb427_040051900		144.499	162.63	194.15
Tb427_110183100		144.462	144.633	137.107
Tb427_030044200		144.281	83.18	99.2211
Tb427_100140000		144.244	145.532	137.49
Tb427_100154600:pseudogene		144.233	164.675	150.55
Tb427_000729100		144.157	157.975	159.596
Tb427_030014900		144.089	99.2976	97.864
Tb427_030029400		144.074	107.285	88.1708
Tb427_030044700		143.997	92.3745	74.9719
Tb427_080077300		143.924	160.493	168.909
Tb427_090063000		143.86	140.113	125.336
Tb427_040023200		143.84	141.157	119.374
Tb427_020015300		143.773	125.207	111.07
Tb427_110059500		143.699	226.333	243.749
Tb427_110017800		143.65	162.586	154.191
Tb427_070069700		143.543	135.038	111.582
Tb427_100050300		143.351	160.521	153.059
Tb427_110188100		143.332	158.964	157.769
Tb427_010019800		143.243	133.605	130.606
Tb427_050021300		143.128	96.7878	96.7041
Tb427_050008200		143.119	106.232	89.8842
Tb427_020020500		143.011	133.446	121.498
Tb427_020008700		142.941	164.756	144.603
Tb427_020021500		142.87	150.323	143.726
Tb427_070076700		142.714	139.607	133.712
Tb427_030051600		142.326	93.0043	91.913
Tb427_110027900		142.264	164.606	140.965
Tb427_050031700		141.866	96.2915	88.7182
Tb427_110028500		141.608	136.501	130.979
Tb427_090018600		141.604	135.797	125.764
Tb427_110177600		141.46	147.083	147.96
Tb427_110150700		141.439	156.219	139.889
Tb427_100087100		141.328	172.302	175.451
Tb427_100010700		141.195	152.993	145.123
Tb427_110036200		141.19	138.727	140.526
Tb427_110015700		141.152	113.889	119.241
Tb427_030051000		141.131	106.812	103.36
Tb427_020010400		141.104	134.87	111.958
Tb427_100051800		140.936	153.744	151.819
Tb427_030032600		140.732	92.3735	95.3356
Tb427_060047400		140.732	134.163	143.261
Tb427_030005700		140.673	96.741	97.3451
Tb427_080063200		140.594	174.883	174.068
Tb427_100085200		140.566	139	122.293
Tb427_090082100		140.556	150.853	154.156
Tb427_090085100		140.4	119.45	131.091
Tb427_100109600		140.309	122.583	132.325
Tb427_070011800		140.288	174.104	180.855
Tb427_060043700		140.197	159.697	148.307
Tb427_100040000		140.158	149.161	126.247
Tb427_080044700		140.065	157.962	128.758
Tb427_050033400		140.046	97.4454	99.0899
Tb427_110085600		139.974	132.477	134.331
Tb427_100018000		139.926	163.654	164.841
Tb427_040010800		139.866	141.244	135.741
Tb427_030013200		139.439	94.1579	95.0156
Tb427_100138200		139.38	155.11	145.658
Tb427_100053100		139.248	152.914	151.813
Tb427_000018800:pseudogene		139.132	1.02649	0.264138
Tb427_100143600:pseudogene		139.069	134.459	130.898
Tb427_060007900		139.024	151.706	142.883
Tb427_090013600		139.01	120.903	130.219
Tb427_030030700		138.991	89.4282	99.149
Tb427_100136600		138.841	122.328	125.843
Tb427_090048500		138.799	137.991	129.244
Tb427_100120300		138.292	156.254	159.059
Tb427_090048100		138.264	145.188	154.11
Tb427_080063000		138.224	159.527	147.281
Tb427_090081900		138.023	144.951	144.201
Tb427_100017300		137.743	136.192	137.63
Tb427_110054100		137.549	132.186	135.097
Tb427_100057100		137.446	154.243	143.973
Tb427_050033600		137.112	88.1888	86.9664
Tb427_070027500		136.955	126.142	107.641
Tb427_010022300		136.904	135.293	121.975
Tb427_070076200		136.803	140.479	144.066
Tb427_080079000		136.677	140.407	134.56
Tb427_110061900		136.532	130.016	130.418
Tb427_090065400		136.52	144.519	140.032
Tb427_080007100		136.455	146.738	140.7
Tb427_080057800		136.419	127.596	127.662
Tb427_110169900		136.37	134.807	131.718
Tb427_040055500		136.34	137.103	267.091
Tb427_100045800		136.286	142.012	163.546
Tb427_110069600		136.101	103.504	112.024
Tb427_110010900		136.028	158.857	154.92
Tb427_030005500		135.962	84.848	88.2078
Tb427_050029500		135.828	85.2364	80.1895
Tb427_100015900		135.805	142.765	147.007
Tb427_110184700		135.752	177.657	167.63
Tb427_100153600		135.586	145.863	131.106
Tb427_090071400		135.51	167.92	160.114
Tb427_040005900		135.44	109.885	112.43
Tb427_020015500		135.39	128.617	106.926
Tb427_110181000		135.377	137.735	126.441
Tb427_080026300:pseudogene		135.176	121.347	96.7697
Tb427_080059200		135.098	176.996	180.349
Tb427_090059000		135.085	130.827	119.505
Tb427_090031200		135.062	132.339	116.355
Tb427_040043200		134.832	140.675	153.464
Tb427_110152900		134.699	149.809	153.927
Tb427_060044400		134.529	136.649	129.36
Tb427_100089700		134.521	143.713	149.693
Tb427_060046200		134.491	152.133	163.76
Tb427_060054700		134.426	139.541	129.049
Tb427_040030800		134.318	131.118	130.229
Tb427_070008100		134.271	150.265	127.664
Tb427_030056200		134.01	103.499	89.8035
Tb427_090039600		133.983	137.345	152.589
Tb427_110041000		133.976	144.804	138.631
Tb427_070012400		133.968	143.832	146.433
Tb427_060054900		133.945	156.755	171.155
Tb427_100017700		133.8	159.96	144.605
Tb427_110172200		133.789	136.813	131.059
Tb427_030028000		133.76	88.6556	88.074
Tb427_060053800		133.402	152.184	155.279
Tb427_030041600		133.135	101.979	98.9699
Tb427_100069300		133.023	157.007	138.233
Tb427_090075000		133	134.645	109.627
Tb427_090034200		132.741	138.834	136.271
Tb427_080087100		132.709	144.833	140.359
Tb427_110123200		132.709	136.587	130.395
Tb427_010024300		132.692	122.715	124.444
Tb427_100046700		132.685	155.581	178.557
Tb427_050016300		132.684	85.4018	85.3612
Tb427_050040400		132.445	111	105.461
Tb427_090012800		132.337	139.224	133.017
Tb427_050012600		132.225	88.9953	92.2626
Tb427_110075200		132.204	121.174	141.019
Tb427_030051300		131.785	114.21	121.832
Tb427_050032000		131.703	106.691	93.4345
Tb427_110190000		131.697	181.808	154.871
Tb427_100054600		131.51	177.924	177.886
Tb427_110187200		131.505	125.594	120.98
Tb427_020016400		131.497	149.094	119.158
Tb427_110135500		131.482	115.635	120.207
Tb427_100135300		131.393	129.116	122.358
Tb427_040025700		131.386	158.358	149.517
Tb427_100077200		131.374	135.669	116.209
Tb427_110019000		131.282	146.09	148.675
Tb427_090054700		131.216	145.183	155.431
Tb427_040046200		131.145	127.321	136.703
Tb427_110027400		131.143	145.593	144.926
Tb427_110150500		131.044	118.367	126.231
Tb427_050039900		130.964	101.03	85.8942
Tb427_110170300		130.93	132.403	107.106
Tb427_050026400:pseudogene		130.93	92.6717	98.0347
Tb427_110049900		130.871	122.934	113.462
Tb427_090049500		130.867	156.049	171.681
Tb427_110059000		130.829	145.035	156.506
Tb427_050030100		130.798	88.2329	86.1814
Tb427_100165600		130.774	142.162	131.621
Tb427_040020000		130.523	156.949	131.214
Tb427_060036900		130.423	115.892	104.98
Tb427_080084200		130.393	136.865	131.336
Tb427_060012900		130.338	137.067	132.37
Tb427_090046300		130.159	144.923	132.395
Tb427_060051700		130.101	121.347	132.617
Tb427_110051000		129.931	124.227	121.536
Tb427_080031600		129.838	127.575	134.007
Tb427_030049400		129.771	90.1542	87.073
Tb427_090072800		129.686	116.879	114.065
Tb427_060054000		129.624	150.42	151.318
Tb427_100062700		129.508	129.077	108.621
Tb427_100011500		129.48	135.772	112.658
Tb427_090076100		129.072	127.964	130.314
Tb427_050037200		129.046	89.57	93.9845
Tb427_030029000		128.986	90.8149	90.7585
Tb427_110125200		128.955	143.7	148.764
Tb427_090045900		128.847	124.558	118.191
Tb427_030040700		128.82	87.1567	85.3397
Tb427_100122800		128.776	142.878	149.511
Tb427_110163900		128.712	136.669	128.857
Tb427_060053700		128.687	152.211	156.19
Tb427_010010100		128.59	123.702	134.235
Tb427_000008200		128.548	5.64766	8.28048
Tb427_010016600		128.399	134.274	117.189
Tb427_030023400		128.389	98.8846	79.7832
Tb427_110169300		128.353	143.698	134.438
Tb427_110073000		128.287	119.068	122.638
Tb427_030011800		128.083	82.2346	83.2267
Tb427_110159000		128.009	134.235	124.992
Tb427_100127400		127.987	139.542	140.733
Tb427_110056500		127.979	130.93	126.399
Tb427_070081900		127.828	150.93	180.273
Tb427_040021500		127.825	131.555	134.976
Tb427_110146100		127.775	133.653	129.029
Tb427_050013300		127.772	81.1966	84.2228
Tb427_030040500		127.757	86.7427	86.4534
Tb427_110137100		127.719	158.307	143.922
Tb427_110106300		127.678	127.828	124.465
Tb427_110099900		127.64	126.492	126.165
Tb427_080039100		127.463	129.205	111.502
Tb427_110035700		127.406	117.982	110.044
Tb427_110085100		127.18	130.692	123.502
Tb427_090062400		126.975	137.435	130.575
Tb427_040022900		126.969	139.008	126.681
Tb427_090011500		126.952	113.429	113.148
Tb427_050045100		126.907	72.5125	69.1464
Tb427_110093900		126.9	129.122	120.263
Tb427_060023100		126.888	118.902	129.21
Tb427_060036300		126.881	121.969	115.109
Tb427_030044100		126.74	87.3645	74.2888
Tb427_090025700		126.652	134.98	121.287
Tb427_010023900		126.648	127.386	125.358
Tb427_060035100		126.539	126.635	117.708
Tb427_060014500		126.496	131.852	143.032
Tb427_030039600		126.417	90.7086	102.675
Tb427_070083400		126.408	113.214	112.18
Tb427_100131700		126.334	122.86	107.339
Tb427_040023000		126.29	115.236	114.018
Tb427_060054200		126.244	152.021	155.44
Tb427_110046500		126.189	130.858	135.94
Tb427_030047800		126.128	84.7232	83.8161
Tb427_050023000		126.11	81.5181	82.7595
Tb427_110183600		126.073	115.482	113.616
Tb427_110173400		126.046	109.297	119.993
Tb427_050047700		125.957	77.1209	79.5494
Tb427_100155800		125.926	149.224	131.825
Tb427_090083600		125.905	125.464	110.983
Tb427_050012200		125.876	99.1589	96.3385
Tb427_070057800		125.777	146.221	131.552
Tb427_070026300		125.582	125.605	113.386
Tb427_040020400		125.549	128.855	104.405
Tb427_020008100		125.499	128.624	114.348
Tb427_020015400		125.356	130.463	134.015
Tb427_100147300		125.281	127.516	124.234
Tb427_070045200		125.118	120.381	132.128
Tb427_030017500		124.978	102.439	93.9971
Tb427_070063400		124.951	116.582	110.217
Tb427_090042600		124.923	122.011	127.229
Tb427_100164400		124.885	126.371	137.306
Tb427_060055500		124.871	123.606	113.543
Tb427_060054100		124.823	140.786	146.553
Tb427_060055100		124.78	109.548	117.244
Tb427_060038000		124.628	123.423	117.433
Tb427_110014200		124.608	109.264	105.587
Tb427_110145600		124.493	125.735	102.105
Tb427_100093300:pseudogene		124.402	117.977	119.232
Tb427_110053900		124.369	120.141	115.639
Tb427_070054400		124.319	115.49	118.404
Tb427_050052000		124.301	98.0413	93.0884
Tb427_050038200		124.144	87.7912	85.489
Tb427_070070100		124.115	135.418	133.241
Tb427_070030500		123.956	121.88	113.767
Tb427_100005500		123.855	125.608	133.677
Tb427_090005500		123.824	117.114	118.986
Tb427_110021600		123.816	112.29	111.573
Tb427_090048000		123.785	109.817	100.143
Tb427_050022700		123.709	80.2223	74.5058
Tb427_100120200		123.659	123.736	113.406
Tb427_090085800		123.561	133.926	133.017
Tb427_040042900		123.554	124.961	129.942
Tb427_080058500		123.525	131.621	112.816
Tb427_100025900		123.485	101.93	92.3862
Tb427_050045700		123.428	85.7371	81.5962
Tb427_110092100		123.427	124.693	110.716
Tb427_110167400		123.395	124.089	123.548
Tb427_110077300		123.388	131.59	128.93
Tb427_100149400		123.355	115.23	103.89
Tb427_110030300		123.306	116.993	126.52
Tb427_110158800		123.252	111.997	129.759
Tb427_030021100		123.201	85.5391	88.3492
Tb427_100101800		123.198	125.217	96.5186
Tb427_050020500		122.989	94.6783	79.4502
Tb427_100101700		122.977	109.667	93.5873
Tb427_090035500		122.908	146.122	134.634
Tb427_060011900		122.9	131.107	115.322
Tb427_090081000		122.802	114.207	102.867
Tb427_100076200		122.709	90.4914	107.659
Tb427_050027400		122.622	74.1665	82.8736
Tb427_050047100		122.545	65.3837	71.9401
Tb427_080066300		122.526	158.914	156.989
Tb427_080058600		122.451	131.872	132.836
Tb427_110149600		122.414	133.919	114.132
Tb427_060020600		122.406	122.692	124.891
Tb427_100046900		122.4	125.501	114.407
Tb427_050033900		122.33	80.7888	69.3104
Tb427_050023800		122.272	76.6487	73.8016
Tb427_070039500		122.268	142.127	122.846
Tb427_060042500		122.249	113.743	114.193
Tb427_100070700		122.231	118.256	115.02
Tb427_110170800		122.196	132.577	114.77
Tb427_110146300		122.18	125.425	128.644
Tb427_060008200		122.13	133.509	122.885
Tb427_100170400		122.036	132.949	142.132
Tb427_030054300		122.01	76.8825	82.9054
Tb427_090023300		121.75	124.48	116.587
Tb427_100040200		121.731	128.221	127.187
Tb427_030018700		121.606	83.8672	77.8101
Tb427_070043000		121.503	129.436	124.452
Tb427_110178400		121.497	109.377	94.8724
Tb427_030028900		121.364	83.4746	80.5
Tb427_030050900		121.348	114.384	118.924
Tb427_110015400		121.282	107.705	103.254
Tb427_060047500		121.263	127.073	133.564
Tb427_100132000		121.237	111.216	110.998
Tb427_100061200		121.187	105.854	108.611
Tb427_110066500		121.182	137.332	139.289
Tb427_110088000		121.175	131.399	120.015
Tb427_080019600		121.106	122.621	109.133
Tb427_030009500		120.925	79.2134	86.8939
Tb427_060051500		120.857	133.285	131.79
Tb427_100005200		120.822	145.171	154.929
Tb427_030010500		120.688	79.12	82.3792
Tb427_060053900		120.647	144.341	146.741
Tb427_110179700		120.523	140.884	124.364
Tb427_100150400		120.412	120.831	120.052
Tb427_100118600		120.384	127.988	112.402
Tb427_080022500		120.366	122.207	116.577
Tb427_100151800		120.331	117.042	117.733
Tb427_090050200		120.284	123.176	121.069
Tb427_050033000		120.272	80.8093	73.585
Tb427_050015700		120.25	89.845	85.6831
Tb427_100149500		120.157	119.37	109.042
Tb427_070064300		120.141	129.324	104.127
Tb427_050024000		120.141	80.0576	81.9276
Tb427_070047200		120.111	183.609	189.17
Tb427_080049400		120.047	125.93	111.75
Tb427_000481600:pseudogene		119.996	110.45	117.189
Tb427_040012100		119.971	121.357	119.923
Tb427_100084800		119.958	117.963	118.7
Tb427_110066600		119.922	115.016	111.933
Tb427_080087800		119.905	119.672	112.868
Tb427_070028200		119.758	145.964	117.568
Tb427_040050900		119.745	145.416	159.458
Tb427_030036500		119.682	130.054	116.149
Tb427_080061400		119.615	157.402	143.487
Tb427_040040800		119.516	136.884	134.221
Tb427_100013900		119.427	112.12	109.205
Tb427_040037400		119.389	113.341	124.989
Tb427_080028700		119.38	106.976	107.939
Tb427_010021600		119.344	145.425	132.685
Tb427_070036100		119.339	125.472	114.798
Tb427_100128400		119.054	108.744	98.3404
Tb427_080013100		119.048	94.3456	83.6617
Tb427_110164500:pseudogene		118.989	103.011	74.4889
Tb427_110180000		118.94	123.224	126.965
Tb427_060053600		118.886	141.573	142.832
Tb427_050046400		118.824	89.0524	93.6777
Tb427_030045100		118.716	69.0356	62.5296
Tb427_080007600		118.716	106.835	106.18
Tb427_030006200		118.626	77.3179	78.9715
Tb427_030052600		118.611	86.3185	88.2361
Tb427_060045700		118.543	102.316	110.886
Tb427_050036000		118.44	78.7052	83.6167
Tb427_090014400		118.289	102.089	104.341
Tb427_050037900		118.273	74.4588	79.828
Tb427_050026300		118.188	79.4312	81.3357
Tb427_100006200		118.111	111.877	112.365
Tb427_050013800		118.11	82.1732	80.744
Tb427_110020900		117.983	127.144	126.407
Tb427_110070300		117.955	99.6969	94.0637
Tb427_100163800		117.939	123.32	118.416
Tb427_110142100		117.938	110.923	112.278
Tb427_050037600		117.915	85.1218	84.3041
Tb427_080025200		117.883	126.366	104.124
Tb427_110176100		117.818	127.292	125.278
Tb427_090014900		117.799	110.984	93.3839
Tb427_030049700		117.798	97.7909	97.6872
Tb427_040020600		117.783	112.514	104.053
Tb427_020015700		117.771	108.796	93.1027
Tb427_110033400		117.701	142.899	129.755
Tb427_030053800		117.685	79.1591	86.2843
Tb427_040036100		117.671	111.175	101.498
Tb427_080030800		117.532	121.8	125.8
Tb427_080054400		117.29	122.844	110.241
Tb427_110035600		116.935	145.538	135.847
Tb427_070046600		116.891	119.698	112.009
Tb427_030031900		116.799	77.2404	77.9726
Tb427_110129700		116.651	133.8	127.144
Tb427_060018600		116.631	128.96	128.869
Tb427_110076300		116.627	111.961	109.385
Tb427_110176900		116.481	130.073	108.399
Tb427_030059700		116.389	80.2383	80.7191
Tb427_050039500		116.36	81.3538	71.1716
Tb427_110161000		116.196	127.394	131.822
Tb427_110152200		116.012	111.136	100.823
Tb427_080012000		115.845	109.204	109.265
Tb427_060017900		115.806	132.825	126.454
Tb427_110081500		115.788	116.628	108.346
Tb427_030007700		115.709	89.4297	90.8196
Tb427_070079400		115.695	113.627	116.897
Tb427_100155700		115.611	116.399	104.631
Tb427_100054900		115.593	115.205	109.724
Tb427_100132400		115.49	90.9939	103.07
Tb427_110043100		115.386	127.609	129.034
Tb427_080050800		115.352	117.199	105.171
Tb427_050023600		115.213	75.7189	74.848
Tb427_050027800		115.168	82.2401	77.709
Tb427_040020800		115.152	116.866	107.787
Tb427_100163500		115.087	106.101	97.9363
Tb427_000747500		115.027	133.936	127.355
Tb427_070050600		114.927	108.339	106.206
Tb427_110045400		114.827	104.118	96.6623
Tb427_100163900		114.825	113.683	114.592
Tb427_100116000		114.812	122.069	112.026
Tb427_070041200		114.773	121.079	116.138
Tb427_050051900		114.725	82.0203	78.3976
Tb427_080056200		114.725	95.5984	99.1043
Tb427_090029400		114.707	112.522	99.9496
Tb427_090029600		114.612	111.605	101.677
Tb427_080046300		114.603	128.063	123.631
Tb427_070040500		114.486	118.646	109.534
Tb427_090047100		114.436	123.585	123.96
Tb427_050022800		114.432	74.8863	77.4463
Tb427_090050300		114.424	119.38	129.036
Tb427_110177200		114.357	128.72	110.148
Tb427_090047300		114.356	128.531	146.394
Tb427_100053600		114.347	111.114	113.719
Tb427_060030700		114.047	119.572	110.934
Tb427_100086700		114.032	109.517	117.159
Tb427_110110900		113.843	113.495	119.955
Tb427_050006000		113.792	85.2282	93.8629
Tb427_060032000		113.769	113.895	110.231
Tb427_030058500		113.665	83.6879	82.4232
Tb427_110069300		113.655	83.8325	87.9679
Tb427_080066800		113.515	207.197	234.762
Tb427_080082300:pseudogene		113.474	103.292	106.535
Tb427_100109900		113.371	117.038	121.354
Tb427_050026900		113.369	68.6666	71.0814
Tb427_110027300		113.279	105.322	96.8998
Tb427_050024200		113.245	71.9453	80.503
Tb427_070081800		113.236	137.582	160.004
Tb427_090031900		113.159	125.914	118.919
Tb427_110179200		113.119	132.198	133.01
Tb427_070070700		113.105	100.18	104.807
Tb427_090054600		113.095	126.783	123.061
Tb427_110155000		113.089	141.374	136.21
Tb427_050038900		113.02	67.1039	67.1521
Tb427_110109000		112.953	114.611	113.155
Tb427_000730800		112.937	125.891	118.445
Tb427_040017800		112.937	110.621	114.324
Tb427_010030200		112.91	112.201	102.108
Tb427_100018600		112.817	107.692	106.973
Tb427_040019100		112.726	107.913	104.223
Tb427_100083500		112.595	104.921	107.461
Tb427_090060000		112.46	123.279	111.2
Tb427_100168700		112.451	117.69	115.67
Tb427_100135200:pseudogene		112.341	102.222	101.775
Tb427_100096100		112.22	105.407	105.352
Tb427_000286900		112.145	87.8156	73.8365
Tb427_010032200		112.123	103.197	103.704
Tb427_030024400		112.109	77.7279	70.4543
Tb427_100011900		112.071	107.413	108.031
Tb427_100146100		112.068	114.855	107.275
Tb427_030021900		112.039	76.1411	83.3001
Tb427_050047300		111.975	71.5533	72.5261
Tb427_080087700		111.957	123.272	117.59
Tb427_100011100		111.932	110.57	101.342
Tb427_100017900		111.859	107.377	111.727
Tb427_030014800		111.858	89.355	62.6405
Tb427_020010600		111.853	125.182	128.196
Tb427_030045800		111.805	65.2859	65.7569
Tb427_110085200		111.791	185.904	161.135
Tb427_100096900		111.732	132.529	118.254
Tb427_050012100		111.715	67.1469	70.6761
Tb427_100019400		111.649	123.898	112.031
Tb427_020020100		111.64	127.353	120.65
Tb427_000010800		111.562	7.74633	11.1753
Tb427_060026300		111.521	110.951	119.987
Tb427_000665200		111.499	119.415	112.425
Tb427_080073800		111.41	159.355	170.768
Tb427_030038200		111.406	74.8863	74.8037
Tb427_060050900		111.396	121.193	125.263
Tb427_100142400		111.219	101.431	111.013
Tb427_110177500		111.182	112.81	102.785
Tb427_110086500		111.103	107.357	121.379
Tb427_090069200		111.057	130.606	114.313
Tb427_050012700		111.047	68.9796	71.0022
Tb427_100064400		111.041	125.805	123.914
Tb427_110068500		111.036	88.6371	91.9036
Tb427_080053200		110.948	127.43	125.275
Tb427_110090800		110.883	123.581	119.982
Tb427_000667400		110.878	120.436	118.089
Tb427_110043400		110.87	114.658	114.353
Tb427_110101800		110.842	109.665	105.069
Tb427_110131400		110.815	119.871	90.7734
Tb427_100150700		110.786	121.705	115.592
Tb427_110013600		110.77	98.3614	102.459
Tb427_090070700		110.691	113.67	113.315
Tb427_050046100		110.69	69.3032	71.7054
Tb427_030031700		110.667	68.5862	69.6995
Tb427_040011100		110.659	125.141	120.503
Tb427_110127600		110.557	119.912	115.654
Tb427_110069900		110.375	79.7201	91.2101
Tb427_110109200		110.312	114.865	125.731
Tb427_040012000		110.294	100.952	101.1
Tb427_070042900		110.279	116.255	125.541
Tb427_030012100		110.271	70.6366	69.2481
Tb427_110123400		110.265	122.76	111.302
Tb427_050034300		110.208	77.6418	77.186
Tb427_100088900		110.173	111.565	113.756
Tb427_100015600		110.171	113.735	121.865
Tb427_070072000		110.162	101.179	112.08
Tb427_110093700		110.087	104.594	113.264
Tb427_100054200		110.051	125.818	120.612
Tb427_040039100		110.035	104.93	108.486
Tb427_090057300		109.951	102.568	124.103
Tb427_030011200		109.924	74.7964	72.9446
Tb427_030037600		109.901	81.1868	82.5199
Tb427_100032500		109.761	111.669	117.472
Tb427_040015700		109.734	109.826	108.401
Tb427_080023400		109.701	116.85	107.86
Tb427_050017200		109.633	76.8202	78.7846
Tb427_030049100		109.578	73.8725	69.4086
Tb427_070054800		109.543	111.993	111.834
Tb427_110089600		109.525	108.207	107.561
Tb427_070078300		109.497	103.383	100.873
Tb427_100042200		109.4	102.985	98.0952
Tb427_050030700		109.373	74.7172	58.9401
Tb427_110037600		109.313	94.9002	96.401
Tb427_110014500		109.308	100.541	100.468
Tb427_050017700		109.299	78.5516	75.9337
Tb427_050025000		109.238	69.7954	74.719
Tb427_100096800		109.205	125.413	113.116
Tb427_020027300		109.173	116.732	105.939
Tb427_070044100		109.059	194.199	152.839
Tb427_000286100		109.008	78.4298	74.3757
Tb427_060044500		108.995	102.078	103.937
Tb427_110102000		108.926	123.152	118.878
Tb427_050014900		108.904	77.068	73.0039
Tb427_080076700		108.838	118.01	114.049
Tb427_080009200		108.836	114.308	103.038
Tb427_010031000		108.749	95.4384	90.075
Tb427_010031200		108.684	127.577	131.322
Tb427_070029500		108.674	112.567	110.792
Tb427_110081300		108.64	104.869	104.001
Tb427_100154500		108.493	110.635	99.6079
Tb427_090021200		108.463	119.172	126.849
Tb427_100051000		108.46	109.056	99.3703
Tb427_100040800		108.452	103.95	97.33
Tb427_030024600		108.437	79.531	83.2914
Tb427_080005800		108.397	112.722	102.236
Tb427_030058900		108.265	72.7974	72.1255
Tb427_100131000		108.236	111.163	122.858
Tb427_110094600		108.185	102.574	92.2597
Tb427_100160400		108.14	103.567	100.214
Tb427_020010000		108.135	116.515	111.883
Tb427_040015100		108.104	102.754	98.4185
Tb427_110098700		108.059	112.069	102.564
Tb427_080012100		107.961	119.985	111.622
Tb427_100085300		107.939	110.143	118.077
Tb427_010019900		107.921	108.955	94.6506
Tb427_110082500		107.918	100.616	95.3588
Tb427_090011800		107.911	83.7881	80.2721
Tb427_110142500		107.897	95.7791	93.7999
Tb427_100084500		107.87	127.39	128.294
Tb427_110061100		107.786	136.716	129.885
Tb427_030041000		107.673	75.3116	67.8738
Tb427_110164400		107.633	97.2519	74.9954
Tb427_080042200		107.611	120.137	119.32
Tb427_090087200		107.609	117.069	114.265
Tb427_080042600		107.575	113.669	108.562
Tb427_100090000		107.545	135.222	129.888
Tb427_070076600		107.535	102.356	99.1964
Tb427_020031700		107.489	117.263	116.653
Tb427_100098900		107.471	99.2815	94.5356
Tb427_070013300		107.295	102.853	95.9015
Tb427_090036100		107.285	110.336	104.494
Tb427_070060900		107.273	111.814	117.189
Tb427_080020700		107.085	135.797	131.235
Tb427_100058100		107.046	96.3217	96.6601
Tb427_020029700		107.041	114.626	118.74
Tb427_080075200		106.965	130.698	130.476
Tb427_040014500		106.955	103.908	86.7795
Tb427_080058100		106.927	108.424	112.151
Tb427_100146400		106.87	118.402	126.516
Tb427_080033900		106.861	111.689	111.399
Tb427_030060100		106.755	73.4656	67.6459
Tb427_070025700		106.602	112.119	92.6267
Tb427_050042400		106.583	72.9433	72.878
Tb427_060021200		106.554	100.862	92.972
Tb427_050027000		106.524	71.3308	72.0578
Tb427_110159200		106.455	116.225	119.707
Tb427_030053600		106.434	69.4242	69.9186
Tb427_040049300		106.408	105.134	68.3041
Tb427_060023300		106.317	108.187	99.172
Tb427_040048900		106.283	86.8524	140.216
Tb427_100092200		106.185	100.506	93.2581
Tb427_050009400		106.084	78.8099	69.9139
Tb427_100149100		106.047	117.412	121.636
Tb427_030007400		106.043	70.9154	82.6528
Tb427_040042700		106.019	89.7138	88.5791
Tb427_030056300		105.991	73.5185	68.5694
Tb427_040039200		105.972	98.0466	98.8433
Tb427_050037300		105.874	63.997	67.5149
Tb427_030005800		105.868	67.7486	75.0876
Tb427_020009600		105.809	122.066	118.06
Tb427_110072500		105.773	106.473	100.118
Tb427_070022600		105.761	114.98	113.749
Tb427_040019700		105.632	106.167	102.984
Tb427_110186100		105.624	107.231	100.928
Tb427_040018400		105.619	112.805	106.683
Tb427_060016600		105.61	96.8225	89.1335
Tb427_100029200		105.579	117.666	114.083
Tb427_100155100		105.574	105.27	97.058
Tb427_100063100		105.477	100.989	95.4722
Tb427_030047600		105.474	65.4598	71.5995
Tb427_100145800		105.426	98.2467	114.759
Tb427_060031500		105.313	111.1	102.486
Tb427_050030600		105.288	76.6321	69.2988
Tb427_050048000		105.231	75.2097	66.5847
Tb427_110170700		105.163	100.995	99.2332
Tb427_080068000		105.148	94.4226	93.7512
Tb427_050022000		105.126	75.18	70.6059
Tb427_040025800		105.106	108.538	114.953
Tb427_110075300		105.073	90.1482	84.5181
Tb427_100096000		104.915	105.368	106.911
Tb427_100147400		104.812	102.751	86.924
Tb427_100156000		104.719	98.9906	106.519
Tb427_090061900		104.66	108.713	111.95
Tb427_080073600		104.455	86.404	78.0305
Tb427_030055000		104.429	69.1232	61.6614
Tb427_070044400		104.317	117.373	110.714
Tb427_100018500		104.284	123.367	114.829
Tb427_030034300		104.214	67.0405	72.4768
Tb427_000019700		104.068	2.39631	0.776645
Tb427_100126300		104.039	96.5912	102.536
Tb427_000286200		104.038	70.9464	80.7324
Tb427_040036300		103.974	99.8659	102.203
Tb427_090055700		103.916	107.58	103.693
Tb427_110017200		103.884	127.637	128.344
Tb427_030059900		103.786	69.4714	70.2822
Tb427_100101600		103.778	101.771	106.99
Tb427_100147700		103.746	112.223	111.748
Tb427_030013600		103.739	73.8222	71.3499
Tb427_040022400		103.681	123.976	95.8819
Tb427_080073500		103.573	95.9947	85.1246
Tb427_070037800		103.549	94.702	99.6496
Tb427_030014400		103.528	80.7798	60.0428
Tb427_010026000		103.489	109.373	111.605
Tb427_090015500		103.477	91.4756	97.4568
Tb427_110048800		103.465	108.424	108.022
Tb427_050038500		103.448	74.7106	77.4689
Tb427_060009100		103.424	102.428	102.606
Tb427_030015800		103.315	74.2944	68.3603
Tb427_110162200		103.277	121.869	122.341
Tb427_080042800		103.27	124.784	129.46
Tb427_050007700		103.226	68.9745	55.1214
Tb427_100171000		103.111	86.4849	89.1786
Tb427_080055600		103.097	97.3159	93.0813
Tb427_040036800		102.932	107.666	92.1725
Tb427_090064100		102.928	103.195	102.954
Tb427_050046200		102.855	82.5443	75.1426
Tb427_040042200		102.827	104.889	110.337
Tb427_090068100		102.742	114.446	103.457
Tb427_040016500		102.677	114.485	119.083
Tb427_040041300		102.614	102.772	101.098
Tb427_090024500		102.581	118.836	108.822
Tb427_090058600		102.572	109.978	87.3284
Tb427_100140700		102.5	112.843	121.622
Tb427_100053000		102.468	102.211	106.606
Tb427_080064500		102.461	99.5771	87.3591
Tb427_060048500		102.427	104.71	109.244
Tb427_040019200		102.404	117.602	112.812
Tb427_110058800		102.394	104.269	98.7188
Tb427_070021000:pseudogene		102.3	111.008	111.663
Tb427_060034500		102.25	107.448	88.0186
Tb427_100148600		102.201	115.942	100.831
Tb427_110123500		102.107	97.8083	73.847
Tb427_100110400		102.065	96.2602	97.2791
Tb427_100161400		102.042	112.151	104.706
Tb427_100123500		101.941	107.627	99.8056
Tb427_100017000		101.917	107.084	105.071
Tb427_110189600		101.905	96.9203	90.4851
Tb427_090009000		101.875	100.426	102.704
Tb427_050034400		101.867	64.5376	67.9524
Tb427_030008400		101.835	68.9187	79.9139
Tb427_100047400		101.833	120.265	121.112
Tb427_030033400		101.832	74.8754	63.1312
Tb427_030049600		101.812	61.7041	63.4018
Tb427_110179100		101.704	92.6255	90.9234
Tb427_050016100		101.684	68.6836	66.7667
Tb427_070060600		101.669	107.508	100.405
Tb427_100052400		101.644	126.665	128.528
Tb427_100076300		101.63	100.095	100.793
Tb427_040051500		101.559	100.082	103.418
Tb427_050012000		101.506	62.1268	64.5341
Tb427_040024100		101.242	105.632	97.8996
Tb427_110021900		101.23	102.58	83.9896
Tb427_000730000		101.154	88.5769	117.819
Tb427_040037600		101.142	114.051	82.7387
Tb427_100059500		101.11	109.857	105.47
Tb427_040014700:pseudogene		101.086	110.019	97.7779
Tb427_060041700		101.07	112.596	105.414
Tb427_050050300		101.065	63.1658	59.9099
Tb427_090018700		100.982	102.087	102.984
Tb427_050045600		100.94	60.9059	57.5511
Tb427_100084000		100.937	99.6401	96.8686
Tb427_100055300		100.934	119.395	128.424
Tb427_100029000		100.874	106.162	95.9979
Tb427_090031300		100.863	98.7868	97.5784
Tb427_030045400		100.828	71.8401	72.3736
Tb427_050027300		100.77	69.1073	63.9017
Tb427_100140800		100.682	107.303	98.3322
Tb427_010022200		100.626	99.0175	92.02
Tb427_030041100		100.623	60.1864	58.1307
Tb427_100142800		100.606	99.4012	95.7014
Tb427_090018900		100.582	99.4488	90.3476
Tb427_050038800		100.571	64.6497	63.8774
Tb427_110099500		100.556	106.895	104.091
Tb427_050016200		100.553	67.7904	66.868
Tb427_080082200		100.449	88.208	90.6122
Tb427_040040200		100.434	97.0642	89.0418
Tb427_000668200		100.336	112.513	107.536
Tb427_110081400		100.328	77.8773	102.274
Tb427_030044500		100.328	66.7825	66.7268
Tb427_000655000		100.304	111.77	91.0927
Tb427_080007400		100.282	108.877	98.7273
Tb427_100114000		100.259	98.6708	93.1303
Tb427_000720500:pseudogene		100.244	92.0914	87.9512
Tb427_000772700		100.234	88.1937	99.2328
Tb427_030055500		100.182	61.4307	69.9448
Tb427_110120900		100.18	95.1612	86.1983
Tb427_110161100		100.072	111.509	124.216
Tb427_050050200:pseudogene		100.038	63.0572	65.4377
Tb427_050007200		100.034	60.417	46.589
Tb427_040048500		99.9954	101.985	159.716
Tb427_110151800		99.9602	90.2438	91.5786
Tb427_110170600		99.9132	113.084	101.259
Tb427_100035500		99.8441	107.846	103.01
Tb427_070038800		99.8297	103.118	99.8696
Tb427_100031300		99.8101	96.8504	80.6002
Tb427_090039000		99.7752	112.113	104.168
Tb427_100072900		99.77	99.5398	91.9948
Tb427_110043300		99.7389	98.056	74.3096
Tb427_050041600		99.7211	69.3122	59.7043
Tb427_080011700		99.6796	95.3152	84.4829
Tb427_070030000		99.6775	108.828	109.402
Tb427_110165200		99.6702	93.0198	81.1792
Tb427_090078000		99.6206	93.2443	97.6575
Tb427_000007100		99.6129	6.33015	9.12199
Tb427_100071900:pseudogene		99.5993	106.601	98.7854
Tb427_110089200		99.5863	105.278	111.378
Tb427_110008200		99.495	111.585	98.6823
Tb427_110075900		99.4839	108.376	108.99
Tb427_100045000		99.4582	104.493	109.134
Tb427_080087900		99.3824	91.9212	87.9955
Tb427_110091500		99.3694	126.074	126.118
Tb427_050036400		99.362	68.0643	67.5142
Tb427_070032600		99.3125	93.9364	82.7415
Tb427_110043600		99.2866	104.319	89.4825
Tb427_110007700		99.2863	95.211	95.745
Tb427_100077100		99.2342	103.472	103.011
Tb427_010022800		99.1698	109.276	95.0115
Tb427_000655100		99.1542	90.5299	84.9297
Tb427_030012500		99.1024	75.8676	82.7538
Tb427_030021600		99.0855	68.1197	64.7601
Tb427_020021600		99.0482	102.152	90.7551
Tb427_110120700		99.0221	118.036	103.959
Tb427_000664900		98.9535	87.7907	92.6021
Tb427_070013000		98.9414	110.896	94.2463
Tb427_110149800		98.9237	111.88	106.535
Tb427_110187900		98.9229	101.123	107.4
Tb427_080039000		98.8695	112.141	105.704
Tb427_040038400		98.8519	115.437	104.222
Tb427_000621900		98.8515	99.1256	107.546
Tb427_030022300		98.8433	82.5366	78.0175
Tb427_070072200		98.8405	94.6797	90.0907
Tb427_100168100		98.8155	86.8949	89.9364
Tb427_110185900		98.7951	92.8329	79.9016
Tb427_110139100		98.7689	88.1791	90.0366
Tb427_030058100		98.7456	62.0305	61.3089
Tb427_100060900		98.7232	95.1567	96.271
Tb427_110078600		98.714	130.408	136.95
Tb427_080010000		98.7	115.707	118.178
Tb427_080027700		98.6661	104.636	100.575
Tb427_110068900		98.6306	107.968	105.045
Tb427_080017300		98.5606	92.081	94.6317
Tb427_080050400		98.5552	88.7954	84.6483
Tb427_070068300		98.4659	97.0373	99.7739
Tb427_000483800		98.4417	27.7928	26.8594
Tb427_060018900		98.4249	90.5506	113.479
Tb427_050018200		98.3677	69.8667	70.971
Tb427_040018100		98.3644	96.5359	99.1795
Tb427_050036900		98.3473	60.4611	71.6839
Tb427_110134300		98.303	90.9002	77.2744
Tb427_030057100		98.3027	70.5371	67.2529
Tb427_000771700		98.2453	89.0286	100.113
Tb427_110138200		98.2182	83.1528	76.9302
Tb427_070056200		98.1877	85.9105	94.1611
Tb427_030035600		98.17	89.0142	89.7624
Tb427_110061600		98.1413	84.9346	82.2026
Tb427_080028900		98.1091	108.129	108.008
Tb427_060015300		98.1014	97.2548	91.9178
Tb427_110022100		98.0722	95.4651	90.9608
Tb427_060055600		98.0371	100.26	100.157
Tb427_030034100		97.9875	65.4897	60.0211
Tb427_110054300		97.9875	103.455	104.038
Tb427_110183500		97.9875	91.2042	88.5643
Tb427_090050800		97.9726	94.9934	86.9061
Tb427_090045600		97.9525	113.267	101.394
Tb427_070015500		97.9404	95.7194	101.741
Tb427_000775700		97.7658	111.387	107.858
Tb427_090055000		97.6846	89.5542	96.4209
Tb427_040041800		97.6806	96.1175	104.742
Tb427_030014300		97.6703	69.4012	62.6028
Tb427_100093800:pseudogene		97.6106	90.9642	96.3554
Tb427_050021400		97.5876	61.7806	61.378
Tb427_080060300		97.5345	102.605	101.67
Tb427_080064100		97.5051	71.0241	81.3079
Tb427_080088000		97.498	97.7422	91.7773
Tb427_090024900		97.4404	100.892	99.8054
Tb427_040036500		97.4333	105.428	99.5027
Tb427_100163400		97.4206	93.7722	86.2441
Tb427_050052500		97.3953	64.7259	70.3895
Tb427_050051500		97.3163	74.4199	73.0668
Tb427_040025000		97.3079	102.162	110.785
Tb427_090035100		97.3034	104.602	92.051
Tb427_060024800		97.2654	110.983	88.2651
Tb427_110086000		97.2337	88.9691	85.4281
Tb427_110057400		97.205	99.3097	94.8437
Tb427_100090800		97.0421	90.2849	93.6429
Tb427_110031500		97.0302	88.7585	84.6318
Tb427_090006300		96.9739	119.492	128.09
Tb427_110166700		96.9612	92.3829	97.5941
Tb427_070070400		96.8919	82.134	86.591
Tb427_110126200		96.8367	112.952	114.668
Tb427_080025300		96.7966	106.64	106.575
Tb427_080011000		96.7057	84.7044	83.8764
Tb427_080048900		96.6862	94.1533	94.1461
Tb427_050009700		96.6822	59.5872	53.6835
Tb427_030006600		96.5588	64.7474	66.4431
Tb427_110172100		96.5314	94.9953	98.0611
Tb427_110184100		96.525	90.6759	82.6842
Tb427_110185000		96.5028	106.696	101.37
Tb427_090073000		96.5012	80.3192	76.9756
Tb427_050027200		96.4938	75.6035	75.8091
Tb427_080085700		96.3426	89.2086	85.8562
Tb427_010025900		96.3373	108.325	123.871
Tb427_100086300		96.3205	100.182	96.6331
Tb427_050042000		96.2228	63.7865	66.3027
Tb427_030012900		96.1327	64.756	68.0695
Tb427_100131500		96.1278	98.1006	95.1376
Tb427_080022700		96.1268	97.6338	90.2654
Tb427_030048600		96.0833	68.0242	72.332
Tb427_030051900		96.0609	65.0045	72.3487
Tb427_110137800		96.06	90.0317	140.936
Tb427_080029700		96.0392	97.0215	90.9163
Tb427_110009300		96.0389	87.2018	82.3834
Tb427_110103500		96.037	101.689	100.087
Tb427_110090300		95.9828	107.443	101.398
Tb427_110029100		95.972	98.1727	97.084
Tb427_090014500		95.9582	100.417	93.8605
Tb427_080050900		95.9352	88.2219	80.9564
Tb427_030007300		95.8466	61.0787	65.0814
Tb427_060045600		95.8381	91.1292	82.6482
Tb427_030031200		95.7327	70.6802	76.0014
Tb427_020031800		95.7078	85.0067	89.1024
Tb427_030056500		95.6783	67.7373	64.4755
Tb427_080051300		95.6683	94.561	87.3889
Tb427_090038800		95.6492	113.957	97.9815
Tb427_030019700		95.6363	57.6687	62.7973
Tb427_100127700		95.6301	93.0306	85.9499
Tb427_100162300		95.6014	98.9939	98.1198
Tb427_030029300		95.5939	73.0477	74.0218
Tb427_080028800		95.5233	97.8276	84.7503
Tb427_050036800		95.462	61.6596	60.3645
Tb427_100083800		95.4179	90.3315	81.5965
Tb427_110190100		95.4061	87.2917	113.395
Tb427_100039800		95.3965	106.385	98.492
Tb427_090036700		95.3488	94.7978	97.406
Tb427_040009300		95.3441	89.0041	80.0742
Tb427_050029000		95.2324	64.6292	60.1987
Tb427_100028400		95.1864	92.0962	101.893
Tb427_110110800		95.1055	97.7491	91.4056
Tb427_090055100		95.1026	101.697	95.9291
Tb427_110094500		95.0958	100.621	85.732
Tb427_100105200		95.0929	104.309	82.9599
Tb427_050030400		95.0822	64.2227	60.3436
Tb427_100162400		95.0767	99.072	87.224
Tb427_030005200		95.0642	67.5177	48.6032
Tb427_100167900		95.0233	96.5977	96.0016
Tb427_030009800		95.01	65.7578	67.9826
Tb427_050039300		94.9192	59.3619	60.1222
Tb427_090090000		94.9095	110.503	97.4564
Tb427_110059100		94.8288	102.383	100.619
Tb427_030010200		94.813	64.0276	62.3642
Tb427_060032300		94.784	99.9946	88.75
Tb427_080028600		94.7767	282.043	323.052
Tb427_070047600		94.7435	86.6872	83.8413
Tb427_100007900		94.7256	94.6924	91.4654
Tb427_050039600		94.7135	63.4756	59.6956
Tb427_080043600		94.7037	136.266	147.15
Tb427_100157900		94.6375	96.7355	95.5146
[truncated: 15,244 more rows]

## Sheet: all TPM
Geneid		118	221	BES7
Tb427_000487400	VSG118	76528.4	12.6462	0
Tb427_000016000	VSG221	4.97759	71558.3	8.75512
Tb427_000025600	VSG224	5.29842	0.656501	72658.6
Tb427_110013500		2847.08	3295.79	3407.46
Tb427_100060400		2276.31	1987.81	2065.16
Tb427_080057900		2132.31	2584.02	2423.48
Tb427_100064900		2065.27	2164.39	2387.75
Tb427_000236800		1926.14	0.361355	0
Tb427_010018100		1857.34	1777.21	1786.91
Tb427_030033300		1854.8	1229.24	1142.9
Tb427_010017900		1849.99	1743.61	1788.3
Tb427_010017700		1841.11	1770.77	1777.89
Tb427_010017500		1823.47	1718.21	1758.94
Tb427_110089700		1821.92	2252.68	2354.15
Tb427_110180700		1816.93	1986.59	2048.87
Tb427_100037700		1815.27	2192.89	2447.75
Tb427_010018300		1808.03	1725.84	1766.47
Tb427_100060200		1805.88	1563.67	1632.16
Tb427_010017300		1803.16	1728.47	1767.74
Tb427_010017100		1801.75	1726.28	1758.41
Tb427_050021900		1751.2	1433.66	1505.64
Tb427_040024200		1579.18	1964.18	2019.27
Tb427_010018400		1577.9	1523.52	1541.94
Tb427_010017800		1568.17	1516.35	1548.16
Tb427_010017400		1568.12	1540.34	1550.02
Tb427_010018200		1561.19	1516.47	1541.63
Tb427_010017600		1559.51	1518.62	1534.58
Tb427_010017200		1554.46	1501.91	1537.22
Tb427_010018000		1554.01	1518.14	1546.72
Tb427_040020900		1543.84	1965.37	1900.2
Tb427_110012100		1529.8	1864.48	1860.29
Tb427_100091100		1449.41	1820.98	2018.07
Tb427_110110200		1409.14	1632.19	1662.52
Tb427_090089800		1404.53	1799.79	1767.29
Tb427_110123100		1404.01	1582.3	1598.12
Tb427_110124300		1370.78	1515.77	1540.76
Tb427_100045500:pseudogene		1339.21	1489.56	1512.6
Tb427_090082800		1315.78	1492.44	1560.23
Tb427_090082500		1310.43	1449.01	1349.68
Tb427_090027100		1302.1	1418.92	1248.46
Tb427_030013400		1298.04	1250.02	1152.08
Tb427_030033800		1297.17	1111.32	1038.75
Tb427_060047900		1290.61	1384.02	1520.82
Tb427_060047700		1283.42	1359.93	1533.34
Tb427_090065200		1281.97	1558.13	1555.49
Tb427_060048100		1271.64	1384.74	1545.45
Tb427_080066000		1263.07	1506.21	1527.41
Tb427_110129900		1261.48	1388.63	1412.95
Tb427_110037400		1261.12	1496.73	1568.96
Tb427_110129800		1260.81	1401.19	1423.6
Tb427_100154100		1258.78	1523.58	1599.24
Tb427_030040400		1236.36	927.279	883.73
Tb427_080011300		1232.2	1505.85	1576.39
Tb427_100058600		1226.1	1421.72	1549.67
Tb427_010022900		1223.85	1435.48	1548.3
Tb427_110070000		1221.59	1310.48	1259.01
Tb427_110159100		1207.19	1455.25	1470.66
Tb427_110127800		1206.26	1477.17	1551.32
Tb427_090023700		1188.66	1429.07	1608.06
Tb427_090024000		1185.1	1434.6	1605.85
Tb427_110105600		1184.69	1564.09	1501.54
Tb427_100089200		1183.82	1316.23	1296.74
Tb427_030033700		1176.16	1038.23	970.981
Tb427_100120100		1172.82	1288.07	1173.32
Tb427_100045600		1156.78	1377.58	1362.54
Tb427_100120900		1148.73	1529.64	1554.2
Tb427_060010600		1142.11	1419.87	1469.01
Tb427_100096400		1140.92	1099.45	1091.34
Tb427_100008800		1136.57	1310.07	1403.41
Tb427_100105600		1136.04	1357.41	1461.9
Tb427_090065500		1130.32	1178.51	1295.21
Tb427_090008900		1127.09	1312.26	1247.21
Tb427_090008800		1121.09	1293.28	1247.55
Tb427_030055300		1118.33	842.991	847.774
Tb427_100097400		1113.89	1211.17	1063.22
Tb427_110064600		1112.2	1105.45	1073.64
Tb427_100104800		1109.82	1408.02	1400.66
Tb427_100149600		1102.88	1373.78	1315.69
Tb427_100060100		1081.67	1313.19	1341.29
Tb427_110146800		1079.44	1294.8	1280.74
Tb427_100155400		1059.95	1236.64	1388.83
Tb427_080013500		1058.13	1297.27	1354.81
Tb427_110048200		1056.14	1267	1336.8
Tb427_050014700		1052.16	752.556	743.389
Tb427_080067500		1050.7	1316.61	1270.36
Tb427_100142600		1050.53	1300.58	1348.39
Tb427_050024500		1044.47	866.84	877.931
Tb427_020031100		1037.57	1223.94	1395.68
Tb427_090045300		1033.73	1301.66	1343.24
Tb427_060052100		1028.21	1235.52	1215.63
Tb427_030010900		1023.16	716.797	699.469
Tb427_090085400		1022.35	1234.86	1267.25
Tb427_030037300		1017.88	782.342	736.226
Tb427_060055400		1016.57	1263.87	1258.16
Tb427_110158000		1014.74	1148.79	1135.52
Tb427_110131300		1012.69	1226.42	1210.28
Tb427_080013400		1011.85	1249.15	1297.85
Tb427_110083700		1007.6	1324.25	1365.28
Tb427_070050700		1002.11	1162.39	1148.32
Tb427_090031400		1000.8	1269.63	1278.52
Tb427_030053900		995.704	945.807	989.7
Tb427_040027800		995.448	950.444	835.131
Tb427_030054000		992.9	947.42	993.138
Tb427_100062500		989.017	1058.34	1081.92
Tb427_100014600		977.633	1267.3	1197.8
Tb427_100123000		976.124	1168.76	1183.63
Tb427_110011100		974.175	1190.49	1195.86
Tb427_100049800		973.138	971.867	1000.15
Tb427_110066300		973.114	1233.48	1340.56
Tb427_110177700		971.662	1183.86	1264.04
Tb427_110177900		964.237	1192	1274.05
Tb427_110105700		958.651	1262.4	1214.01
Tb427_100159900		952.7	1110.18	1211.42
Tb427_030040600		951.518	986.123	966.534
Tb427_040015300		950.147	969.626	910.836
Tb427_040038300		943.032	1087.85	1107.4
Tb427_100038600		937.829	1093.57	1174.76
Tb427_110133800		934.715	1154.54	1125.6
Tb427_110105500		928.269	1121.14	1187.5
Tb427_100134200		925.592	1187.04	1190.64
Tb427_100049600		923.401	899.846	927.161
Tb427_080065700		922.247	1115.92	1172.54
Tb427_060025300		919.181	1151.78	1023.54
Tb427_100043900		918.05	1120.98	1136.41
Tb427_080065800		914.514	1105.35	1232.46
Tb427_100057800		913.192	1069	1163.39
Tb427_090032800		912.546	1102.66	1144.39
Tb427_090065300		911.005	1459.99	1527.25
Tb427_110108800		908.74	1111.55	1201.93
Tb427_100049700		907.463	908.058	940.292
Tb427_090011600		901.912	965.279	1026.59
Tb427_080065900		900.946	910.019	1116.49
Tb427_100006100		900.504	1050.33	1186.15
Tb427_110041200		900.043	1035.07	1145.8
Tb427_060056300		899.789	1123.45	1037.93
Tb427_090082700		899.637	1049.97	1123.09
Tb427_060054800		898.496	1074.99	1121.27
Tb427_000019100:pseudogene	BES3 ESAG7	897.499	17.4319	38.833
Tb427_100054400		891.483	1133.06	1120.58
Tb427_030046700		888.878	738.886	831.709
Tb427_100014800		888.718	1081.18	1151.1
Tb427_110035000		884.282	1169.38	1262.26
Tb427_100025200		882.34	775.788	838.055
Tb427_110041300		879.618	991.242	1107.31
Tb427_090047200		877.608	1027.01	1112.9
Tb427_110084200		877.599	1013.01	1068.66
Tb427_100024900		875.078	775.86	835.191
Tb427_060046300		873.408	858.361	1001.89
Tb427_100142900		872.4	1077.07	1085.19
Tb427_100024700		871.561	780.108	833.226
Tb427_110066900		867.966	1062.64	1089.85
Tb427_090028400		866.428	910.328	1001.87
Tb427_100025100		866.335	773.652	832.942
Tb427_070057500		864.825	1101.52	1154.39
Tb427_110107000		864.493	975.057	942.839
Tb427_100025000		863.571	769.284	846.27
Tb427_110066700		862.044	1048.24	1108.33
Tb427_100033500		861.983	984.529	968.606
Tb427_090077900		861.727	903.989	855.108
Tb427_100024600		860.405	771.444	840.636
Tb427_100025300		860.129	770.868	841.346
Tb427_110083500		859.371	1161.97	1212.43
Tb427_100024800		857.792	762.803	832.113
Tb427_100024500		857.491	769.764	831.545
Tb427_090070500		855.386	1047.59	1044.22
Tb427_100044000		851.532	1027.1	1049.06
Tb427_100033400		851.518	977.445	962.189
Tb427_100023600		850.627	745.944	843.91
Tb427_040020200		847.548	987.819	1075.39
Tb427_020032000		847.44	1004.24	1068.84
Tb427_100033300		843.499	980.233	970.117
Tb427_010019100		840.965	766.674	857.372
Tb427_010019200		840.628	765.949	849.183
Tb427_110053300		840.521	920.048	1046.09
Tb427_100057700		839.342	968.674	1060.98
Tb427_010019000		839.278	775.299	863.255
Tb427_100038700		838.53	990.735	1083.6
Tb427_010018800		838.012	775.46	851.807
Tb427_090088300		837.431	988.683	1089.39
Tb427_100024400		834.527	754.955	798.495
Tb427_090082600		833.137	888.545	999.601
Tb427_070028000		832.229	998.941	1020.23
Tb427_070042200		831.964	1100.88	936.613
Tb427_030006900		828.204	609.033	519.828
Tb427_100005600		826.439	1001.34	1081.79
Tb427_090070400		821.049	1006.96	944.953
Tb427_010018900		820.884	765.143	843.936
Tb427_000019800:pseudogene		816.427	2.56228	0.223948
Tb427_050015800		815.219	654.03	691.338
Tb427_100058800		815.216	928.157	982.747
Tb427_090058000		810.504	948.271	735.851
Tb427_010019300		808.819	772.961	849.422
Tb427_080070200		807.748	825.884	771.247
Tb427_090043000		805.643	996.36	1006.02
Tb427_080067300		801.823	1006.55	1044.96
Tb427_090043100		800.995	1008.84	1017.25
Tb427_110146700		796.083	969.617	952.791
Tb427_110067900		795.995	985.673	1016.33
Tb427_010018700		794.812	745.799	826.604
Tb427_110108700		790.024	900.192	987.525
Tb427_080067200		786.27	903.821	977.186
Tb427_100032800		776.858	990.52	1006.01
Tb427_100057400		775.653	1002.41	1011.53
Tb427_100043000		769.453	938.204	991.076
Tb427_100154300		764.336	881.03	1006.22
Tb427_100079300		763.827	1250.67	1313.17
Tb427_070014200		762.946	935.467	947.953
Tb427_100079200		762.107	1291.6	1331.08
Tb427_100014700		761.366	934.543	995.589
Tb427_090027000		758.244	719.953	767.476
Tb427_110105400		756.41	892.736	927.172
Tb427_100005300		755.472	937.828	938.201
Tb427_110134900		747.161	897.499	984.447
Tb427_110157800:pseudogene		744.114	859.622	875.205
Tb427_090089500		738.915	910.555	926.604
Tb427_080079900		735.536	715.814	631.526
Tb427_110182400		733.737	836.811	880.571
Tb427_090065100		733.452	933.703	980.507
Tb427_080040100		731.689	897.993	977.365
Tb427_030030200		730.287	458.363	493.798
Tb427_040029800		728.542	795.518	737
Tb427_110049700		727.458	894.127	860.485
Tb427_110068000		724.843	883.549	920.835
Tb427_090088400		721.661	868.794	933.099
Tb427_110134800		718.935	857.545	919.334
Tb427_070028300		711.629	809.473	847.41
Tb427_090061600		700.255	628.313	632.66
Tb427_090044800		700.014	731.072	630.958
Tb427_090088600		697.184	878.277	922.597
Tb427_100057500		696.289	881.153	904.652
Tb427_010019700		693.647	618.53	704.088
Tb427_100018900		691.12	824.471	870.685
Tb427_070017600		688.898	746.197	839.732
Tb427_110025500		686.976	818.42	886.532
Tb427_010019500		683.184	624.092	713.788
Tb427_010019600		681.581	616.999	706.712
Tb427_100149700:pseudogene		680.749	830.386	830.103
Tb427_110048100		680.48	845.27	807.98
Tb427_010019400		677.784	612.163	698.523
Tb427_090088500		676.886	829.004	898.328
Tb427_060045100		676.668	822.876	608.458
Tb427_110023600		676.555	474.601	551.658
Tb427_100044400		672.347	630.914	602.645
Tb427_080005000		671.143	201.058	177.271
Tb427_090045400		666.71	808.723	870.773
Tb427_110025300		663.555	804.92	876.213
Tb427_070017400		651.62	774.963	800.598
Tb427_110104200		647.45	789.374	864.226
Tb427_040053500		647.118	694.705	367.48
Tb427_080022800		646.946	732.721	721.954
Tb427_110103900		646.366	794.922	859.265
Tb427_110167900		642.922	648.03	623.613
Tb427_070055900		642.637	822.866	894.082
Tb427_040022700		636.82	730.419	599.834
Tb427_040020300		635.963	744.657	818.341
Tb427_070055700		631.114	791.913	853.672
Tb427_030009400		628.304	522.899	481.693
Tb427_110070100		626.714	637.783	719.306
Tb427_070014100		620.939	747.107	777.07
Tb427_110149700		620.615	610.962	582.368
Tb427_070057400		618.623	706.026	744.586
Tb427_090031800		614.89	707.163	681.721
Tb427_100068100		612.702	709.156	741.782
Tb427_110147700		610.063	604.161	576.87
Tb427_080073900		610.008	514.382	500.343
Tb427_090052000		599.231	769.504	822.955
Tb427_070053300		594.231	773.783	714.751
Tb427_040038500		591.162	651.884	591.155
Tb427_040038700		585.933	662.161	596.833
Tb427_110178000		584.118	639.021	577.54
Tb427_110103300		574.34	615.341	598.462
Tb427_090029000		572.791	595.984	612.369
Tb427_050016400		570.645	404.807	384.83
Tb427_000019500:pseudogene		567.453	2.42852	1.19774
Tb427_110147100		566.368	616.061	578.843
Tb427_100155900		566.026	609.66	537.612
Tb427_070014300		565.086	661.999	683.319
Tb427_040012900		562.486	667.674	697.741
Tb427_110147200		558.378	623.477	597.309
Tb427_100112400		556.608	501.22	556.247
Tb427_070026500		553.583	596.293	540.338
Tb427_110081800		552.658	528.597	485.062
Tb427_050013400:pseudogene		549.788	369.211	346.937
Tb427_110011500		549.533	597.113	475.546
Tb427_110023300		549.112	530.353	528.702
Tb427_100111500		544.301	499.977	558.793
Tb427_090045500		543.298	635.744	665.931
Tb427_110136200		539.456	727.44	545.339
Tb427_090058900		521.674	449.203	439.848
Tb427_070063700		521.501	558.608	563.463
Tb427_010006500		518.652	440.984	429.258
Tb427_110060300		517.88	593.597	634.247
Tb427_060025400		516.712	640.454	564.797
Tb427_020026400		516.535	493.429	497.343
Tb427_100167200		515.865	536.983	535.341
Tb427_110136400		515.732	710.531	508.751
Tb427_060043400		513.558	541.816	474.225
Tb427_090064500		511.782	523.473	486.524
Tb427_060050100		509.169	537.854	504.007
Tb427_110131800		509.143	582.487	538.223
Tb427_050011000		508.753	356.309	295.066
Tb427_030023900		504.953	352.76	378.159
Tb427_060009000		500.459	456.44	439.92
Tb427_100064800		498.637	453.47	528.446
Tb427_100064600		498.535	509.919	395.979
Tb427_090032000		497.531	570.645	534.382
Tb427_090026000		495.203	1010.04	766.023
Tb427_110147300		494.234	543.913	523.089
Tb427_080007800		493.308	561.038	457.317
Tb427_100062200		492.421	503.443	462.006
Tb427_100112200		492.072	446.93	505.525
Tb427_110031000		491.642	521.543	486.761
Tb427_010027100		490.984	752.635	703.726
Tb427_080056500		489.806	449.113	472.276
Tb427_080040300		488.685	647.939	693.801
Tb427_100112300		485.868	435.748	491.006
Tb427_100112100		484.968	439.38	498.36
Tb427_100073300		484.909	520.278	517.884
Tb427_070046000		484.414	584.158	642.886
Tb427_100112600		483.667	439.475	485.632
Tb427_000019400		483.619	4.46451	9.78614
Tb427_100005400		480.987	515.274	488.288
Tb427_050038600		478.893	366.935	313.214
Tb427_050020400		478.849	365.838	305.941
Tb427_070050100		478.01	532.12	513.292
Tb427_110081200		477.456	465.842	446.374
Tb427_110022600		476.624	370.022	383.389
Tb427_030037700		473.2	351.374	310.48
Tb427_110147000		472.903	534.625	525.078
Tb427_100157100		472.673	462.317	423.767
Tb427_000020000		471.851	0.471638	0.23261
Tb427_110025400		468.844	553.883	624.855
Tb427_100112500		468.559	430.778	500.905
Tb427_000019900		468.265	4.99025	3.78998
Tb427_100112000		468.159	427.623	475.167
Tb427_050025600		465.755	358.117	332.973
Tb427_090050100		462.817	462.226	412.128
Tb427_070021600		461.369	579.494	611.68
Tb427_050016800		457.976	510.704	517.482
Tb427_030022000		452.325	384.562	414.324
Tb427_100111400		448.948	387.671	454.708
Tb427_030040300		448.034	366.363	352.771
Tb427_000018600		446.892	6.6714	6.93406
Tb427_100112700		445.746	392.259	460.271
Tb427_100069700		444.86	433.459	428.545
Tb427_050035900		444.083	264.838	265.971
Tb427_100069500		441.586	427.608	424.401
Tb427_110023800		440.368	438.174	424.956
Tb427_040033100		436.922	498.2	519.307
Tb427_110022700		435.36	356.017	335.916
Tb427_110129000		433.224	381.264	423.47
Tb427_090051000		431.5	468.488	467.127
Tb427_110136500		430.657	607.572	421.95
Tb427_100111800		430.238	382.797	423.314
Tb427_100134500		430.125	427.511	449.535
Tb427_100111300		429.838	403.824	448.675
Tb427_090066100		428.711	487.085	437.8
Tb427_080068100		426.885	417.417	402.56
Tb427_100111600		426.135	395.509	464.891
Tb427_100111700		422.934	366.357	423.879
Tb427_080009100		421.631	420.91	419.668
Tb427_000019200	BES3 ESAG6	419.829	9.26143	13.7431
Tb427_110067200		413.382	416.424	361.646
Tb427_110037500		413.373	475.916	460.272
Tb427_100111900		411.928	382.51	426.896
Tb427_060056200		409.119	520.524	496.278
Tb427_080021500		407.63	394.385	373.358
Tb427_090053900		407.503	372.085	351.567
Tb427_090074600		407.109	425.335	418.18
Tb427_030046200		404.342	291.467	274.825
Tb427_110086200		403.522	464.498	486.087
Tb427_030018100		402.941	395.428	377.72
Tb427_110073700		399.83	399.192	373.843
Tb427_090034500		399.292	383.218	385.106
Tb427_030056900		395.573	275.427	252.262
Tb427_070017200		395.569	435.049	427.185
Tb427_110129100		394.557	350.201	384.429
Tb427_110005500		394.397	408.596	393.766
Tb427_090034800		391.38	392.448	406.028
Tb427_080007500		389.1	382.935	322.811
Tb427_020011600		387.211	439.933	408.316
Tb427_070021900		387.204	480.156	528.249
Tb427_030046100		387.019	282.296	268.289
Tb427_070005900		386.478	441.782	465.785
Tb427_030008300		385.551	360.621	337.196
Tb427_090083100		383.796	379.327	405.222
Tb427_110128800		383.183	349.336	372.005
Tb427_110129300		382.551	345.159	380.454
Tb427_030046000		380.925	279.568	255.378
Tb427_070073700		380.836	361.596	359.72
Tb427_100112800		379.21	330.801	384.753
Tb427_110129500		379.201	344.951	378.729
Tb427_090039900		379.065	413.922	388.243
Tb427_110096300		377.165	383.556	379.43
Tb427_100042900		377.08	416.965	454.164
Tb427_100135700		376.383	382.501	406.42
Tb427_050044700		376.185	261.377	261.72
Tb427_060049500		375.252	388.849	387.934
Tb427_050012900		375.218	227.73	252.056
Tb427_030046300		374.812	304.684	279.015
Tb427_110129400		374.379	336.599	374.058
Tb427_110128900		374.24	341.168	373.668
Tb427_070014900		373.492	415.206	360.556
Tb427_110129200		373.209	334.571	365.439
Tb427_100156200		371.512	458.218	428.117
Tb427_030046400		371.439	273.033	250.431
Tb427_070006000		370.171	438.667	458.205
Tb427_050051300		369.698	250.238	250.437
Tb427_110023500		368.848	329.205	303.834
Tb427_050049900		368.293	228.415	238.597
Tb427_110189900		363.997	360.637	342.244
Tb427_030042800		363.92	270.553	261.545
Tb427_090014800		363.835	346.382	311.039
Tb427_050048600		363.479	253.544	239.336
Tb427_050023900		361.166	259.425	260.85
Tb427_110187400		360.819	375.557	379.636
Tb427_100008600		359.368	392.624	351.86
Tb427_100086000		359.035	354.186	347.205
Tb427_050050100		357.546	244.883	251.466
Tb427_110125400		355.353	364.091	348.82
Tb427_050048900		355.195	233.654	259.166
Tb427_070040800		355.047	358.426	321.678
Tb427_050049600		353.964	227.666	238.914
Tb427_100108100		353.729	367.868	352.337
Tb427_050049100		353.516	242.316	246.297
Tb427_050049000		353.068	238.894	239.863
Tb427_070021700		352.262	436.509	483.355
Tb427_050050000		352.173	252.689	232.901
Tb427_110024600		351.891	354.769	331.576
Tb427_080049200		351.552	395.292	373.996
Tb427_070021800		350.959	434.065	483.18
Tb427_040052100:pseudogene		349.745	491.385	574.057
Tb427_050048800		349.15	229.591	239.652
Tb427_050049200		347.471	228.415	247.458
Tb427_050049400		346.576	252.475	249.145
Tb427_050049700		346.576	240.391	242.922
Tb427_090049100		346.357	314.334	339.062
Tb427_110038200		346.183	321.373	316.311
Tb427_080060100		344.406	341.6	334.54
Tb427_050049500		344.337	244.027	238.07
Tb427_090066200		343.532	368.288	334.838
Tb427_050048500		343.105	235.472	249.884
Tb427_050044900		342.896	284.769	246.083
Tb427_030043600		342.849	457.68	369.138
Tb427_030043800		342.83	454.582	370.086
Tb427_050048700		342.21	232.585	245.454
Tb427_050012800		342.073	245.265	257.189
Tb427_050049800		340.979	223.175	241.234
Tb427_000020100		340.852	0.198782	0
Tb427_050049300		340.419	248.839	238.492
Tb427_110133400		339.871	336.187	313.979
Tb427_060042300		339.48	358.534	344.378
Tb427_080025900		339.414	336.814	295.423
Tb427_070078000		339.114	372.408	390.332
Tb427_080018400		334.646	355.05	332.391
Tb427_110049600		334.301	431.929	402.849
Tb427_060042400		332.71	358.107	341.61
Tb427_040052000		332.441	512.595	515.666
Tb427_070076100		331.561	287.587	361.212
Tb427_110012300		330.95	346.065	313.772
Tb427_110069400		329.902	252.37	229.461
Tb427_100068400:pseudogene		326.278	330.282	326.702
Tb427_000019600:pseudogene		325.77	0.874721	1.4895
Tb427_040027000		325.178	345.486	329.565
Tb427_100149800		324.678	353.581	312.105
Tb427_090049800		323.683	341.949	333.679
Tb427_110160400		322.805	332.411	323.184
Tb427_100080100		321.582	404.35	413.992
Tb427_030038600		317.583	211.503	214.337
Tb427_100149900		316.834	321.784	272.382
Tb427_100155300		314.399	372.507	342.746
Tb427_070010500		313.413	327.086	316.96
Tb427_080055300		313.302	299.485	292.45
Tb427_030044000		312.813	95.7669	99.9543
Tb427_080055200		312.775	292.889	289.525
Tb427_110011700		312.599	326.982	275.353
Tb427_030016500		312.106	232.736	193.147
Tb427_110023400		311.512	319.501	303.388
Tb427_110018200		311.04	387.13	364.662
Tb427_030029600		309.991	227.481	188.56
Tb427_050024400		309.346	194.933	182.95
Tb427_030022800		307.748	222.792	213.673
Tb427_110051900		307.391	332.554	365.451
Tb427_090049700		305.868	340.23	323.393
Tb427_100145300		304.7	302.243	279.106
Tb427_100076900		302.528	267.296	251.165
Tb427_110079200		302.128	334.666	282.319
Tb427_100015000		301.879	321.058	294.371
Tb427_080026200		301.568	345.714	259.365
Tb427_050005600		301.445	203.145	152.44
Tb427_080036000		301.29	321.998	303.655
Tb427_100088800		300.645	321.807	322.082
Tb427_080055000		300.152	284.066	275.875
Tb427_100160500		298.981	297.088	281.837
Tb427_070066900		297.919	282.766	258.534
Tb427_100023700:pseudogene		297.915	264.841	306.628
Tb427_080055400		297.612	283.904	280.786
Tb427_060041400		296.605	275.061	267.844
Tb427_110158700		296.101	278.478	273.891
Tb427_070053500		295.752	304.082	325.365
Tb427_070039700		295.347	307.44	283.21
Tb427_100046100		295.011	338.3	311.917
Tb427_070029600		294.951	328.205	255.394
Tb427_030013500		294.441	232.273	246.302
Tb427_060043000		293.584	307.207	303.513
Tb427_040022600		292.458	352.404	300.156
Tb427_110164300		289.405	251.118	188.422
Tb427_050024300		288.635	189.614	180.642
Tb427_010026900		288.477	467.157	485.963
Tb427_050025100		288.419	201.516	186.746
Tb427_050038700		287.849	222.728	207.107
Tb427_110066200		286.116	336.35	312.97
Tb427_110070500		285.509	208.138	213.011
Tb427_050051600		283.317	200.193	201.155
Tb427_110087200		282.468	312.339	296.35
Tb427_080065400		281.871	369.142	383.108
Tb427_030007100		280.184	188.55	185.553
Tb427_070031000		279.467	269.842	231.079
Tb427_060055700		279.028	309.868	261.094
Tb427_110104400		278.503	312.553	291.932
Tb427_050032100		278.358	215.731	202.173
Tb427_110152700		278.214	294.892	289.604
Tb427_050022900		277.452	235.782	205.461
Tb427_080023800		276.734	314.757	269.89
Tb427_030050200		276.724	215.235	217.753
Tb427_050037700		276.308	181.769	184.807
Tb427_110150300		276.223	248.186	247.639
Tb427_110011800		274.422	301.395	280.168
Tb427_080070000		274.123	296.301	254.781
Tb427_050024600		273.468	178.257	165.629
Tb427_080027800		273.334	264.328	232.098
Tb427_020022600		272.603	290.27	257.541
Tb427_070027000		272.429	324.53	304.379
Tb427_090050700		272.297	330.97	326.523
Tb427_080069600		271.672	377.249	403.053
Tb427_070047000		268.392	403.839	342.677
Tb427_110009700		268.292	294.804	278.168
Tb427_030054400		268.282	177.964	177.309
Tb427_020021800		267.792	285.857	259.741
Tb427_050052200		267.646	198.45	149.884
Tb427_090058400		267.617	303.637	268.081
Tb427_090031700		264.394	267.935	239.439
Tb427_030058700		264.246	184.663	175.106
Tb427_010016700		264.056	260.78	242.626
Tb427_050013700		261.969	182.636	181.538
Tb427_090055900		260.875	264.32	244.263
Tb427_100015200		259.776	324.34	226.955
Tb427_110132400		259.579	263.569	243.205
Tb427_040025600		259.13	263.707	230.853
Tb427_100027900		258.193	304.536	242.939
Tb427_100117400		257.917	279.851	280.684
Tb427_070046100		257.427	267.603	294.249
Tb427_100116700		257.285	223.21	251.666
Tb427_080011900		256.672	278.796	271.794
Tb427_110023100		256.652	261.399	237.894
Tb427_090055600		256.571	257.73	224.351
Tb427_110166800		256.17	248.412	255.558
Tb427_080064200		256.057	273.883	276.869
Tb427_080023700		255.804	239.447	219.676
Tb427_100116100		255.746	226.167	249.414
Tb427_030034700		255.391	188.507	193.673
Tb427_050037400		254.834	231.999	229.26
Tb427_100170800		254.203	228.979	240.754
Tb427_070082200		253.307	287.752	313.7
Tb427_060013500		253.034	217.018	220.079
Tb427_040014600		252.79	243.727	200.813
Tb427_100116300		252.554	230.303	249.852
Tb427_100116400		252.314	225.309	245.152
Tb427_100116900		252.314	224.589	250.653
Tb427_080054000		251.366	444.942	324.104
Tb427_060026000		250.816	282.944	263.807
Tb427_090056700		250.718	260.906	249.61
Tb427_100116800		250.662	221.066	250.955
Tb427_030033600		250.624	164.936	151.202
Tb427_110107600		250.48	232.059	239.787
Tb427_100064700		250.383	227.07	238.236
Tb427_100116600		249.956	226.351	249.172
Tb427_050052400		249.839	162.949	163.737
Tb427_110150600		249.491	284.749	299.01
Tb427_070050200		249.374	248.183	257.336
Tb427_060013700		248.361	221.159	209.882
Tb427_050029400		248.277	174.581	151.39
Tb427_090058100		248.142	262.765	228.491
Tb427_100026100		248.082	244.616	227.855
Tb427_050022400		247.517	164.416	172.858
Tb427_100116500		246.845	220.56	241.843
Tb427_080056000		245.199	243.712	214.616
Tb427_030018900		244.962	198.926	162.99
Tb427_080060000		244.387	274.989	265.738
Tb427_090034600		244.105	233.273	242.418
Tb427_110128000		243.961	312.361	312.709
Tb427_100170600		243.429	199.48	267.939
Tb427_100136100		243.084	245.938	228.516
Tb427_110031400		242.56	247.681	268.515
Tb427_100111200		242.534	217.253	259.551
Tb427_050026200		242.509	149.752	134.477
Tb427_050015600		242.293	173.429	172.96
Tb427_070069900		241.401	258.635	242.917
Tb427_090052600		241.3	247.745	242.007
Tb427_040021600		241.034	280.457	252.797
Tb427_110138800		241.032	226.885	222.448
Tb427_050051800		240.91	167.467	177.013
Tb427_100134400		240.772	247.813	234.603
Tb427_100101500		240.751	258.126	240.635
Tb427_030021500		240.528	180.926	183.621
Tb427_100130700		240.494	282.569	265.132
Tb427_100026600		240.426	248.173	208.223
Tb427_060014000		240.145	208.69	208.312
Tb427_050023200		240.052	189.617	150.984
Tb427_040046900		239.892	210.891	228.272
Tb427_050040500		239.789	151.645	148.56
Tb427_060048800		239.728	236.375	236.08
Tb427_110009200		239.341	227.501	212.244
Tb427_050010800		239.039	164.928	120.815
Tb427_110172800		238.474	262.725	247.617
Tb427_000019300		237.76	2.32336	4.14993
Tb427_060033000		237.397	287.851	299.675
Tb427_100116200		237.078	209.928	237.914
Tb427_020025500		236.859	247.783	231.195
Tb427_030057200		236.711	162.248	125.298
Tb427_060013000		236.479	206.742	207.803
Tb427_100078900		236.136	256.737	212.516
Tb427_060013600		236.027	208.634	202.536
Tb427_020021900		235.588	291.555	273.663
Tb427_100090500		235.233	224.86	226.092
Tb427_110063500		234.759	265.791	214.427
Tb427_070015100:pseudogene		234.125	261.107	266.712
Tb427_070036600		233.944	256.588	231.491
Tb427_060014200		233.788	209.29	208.194
Tb427_050010100		233.773	174.158	170.848
Tb427_030006100		233.282	168.735	164.574
Tb427_090029800		232.526	241.144	227.037
Tb427_100050500		232.298	245.143	230.522
Tb427_090006700		231.252	256.198	280.461
Tb427_110079500		230.917	230.011	202.788
Tb427_060009300		230.351	289.213	264.509
Tb427_080072900		230.328	230.825	229.892
Tb427_090069900		230.011	265.557	248.339
Tb427_070019000		229.383	250.242	220.023
Tb427_100032100		229.225	255.659	245.338
Tb427_110021800		229.184	248.046	269.787
Tb427_070075300		229.17	211.275	227.283
Tb427_110063600		229.119	218.481	213.477
Tb427_100124600		229.074	283.004	272.875
Tb427_110012700		228.115	261.113	251.594
Tb427_090081800		227.793	235.663	221.862
Tb427_030059000		227.17	145.807	155.866
Tb427_110070900		226.407	206.492	240.705
Tb427_100144100		226.265	220.809	235.42
Tb427_060013200		224.546	194.289	195.496
Tb427_050053700		223.612	121.124	103.818
Tb427_060032100		223.266	273.737	217.112
Tb427_100099100		223.209	206.588	202.613
Tb427_080020300		222.959	290.317	268.043
Tb427_030039700		222.212	145.325	147.364
Tb427_100071700		221.579	241.358	223.007
Tb427_100041700		221.008	233.98	263.492
Tb427_070039400		220.773	257.556	263.356
Tb427_070009500		220.437	198.524	199.197
Tb427_100089600		220.296	244.053	240.474
Tb427_100041200		219.828	205.316	213.15
Tb427_090064200		219.676	216.695	244.957
Tb427_100051500		219.059	239.299	227.72
Tb427_080048200		219.039	239.303	228.388
Tb427_100156700		218.416	275.974	249.77
Tb427_050037500		218.366	138.035	125.628
Tb427_100124700:pseudogene		218.312	252.598	168.302
Tb427_090080200		218.049	214.57	202.012
Tb427_090077100		217.839	214.784	208.26
Tb427_060014100		217.608	183.513	185.727
Tb427_090073400		217.353	217.126	223.994
Tb427_110082200		217.263	217.226	202.033
Tb427_050044800		217.163	171.26	156.685
Tb427_100006300		217.158	243.942	241.542
Tb427_100071000		216.955	208.781	224.228
Tb427_030016600		216.29	183.904	166.954
Tb427_010016800		216.21	226.146	203.237
Tb427_050036100		215.9	133.681	142.185
Tb427_050052700:pseudogene		215.479	175.834	163.534
Tb427_100156600		214.929	276.149	252.053
Tb427_020013800		214.908	217.382	235.393
Tb427_060013900		214.869	185.793	193.113
Tb427_070069300		214.819	224.83	207.567
Tb427_090073100		214.334	222.41	222.728
Tb427_060013800		213.286	181.736	186.2
Tb427_070051200		213.176	250.101	236.283
Tb427_090083000		212.678	215.723	224.857
Tb427_060036100		212.666	216.803	198.288
Tb427_010020700		212.477	215.307	216.601
Tb427_100150000		212.399	209.764	188.905
Tb427_060048300		211.823	237.179	220.715
Tb427_110075000		211.582	243.447	226.216
Tb427_090082000		211.544	215.715	228.091
Tb427_030010100		211.512	169.619	156.776
Tb427_030007500		211.303	173.988	168.353
Tb427_050034200		211.299	127.568	141.316
Tb427_100008400		211.059	239.978	244.79
Tb427_050023100		210.596	153.094	153.578
Tb427_090086100		210.479	238.047	220.496
Tb427_100153300		210.069	210.162	207.839
Tb427_100091200		209.958	128.583	125.018
Tb427_070009100		209.794	236.956	235.616
Tb427_080059800		209.45	232.383	224.357
Tb427_060013100:pseudogene		209.341	179	181.631
Tb427_030012200		209.232	130.241	137.368
Tb427_090066800		208.884	218.994	208.127
Tb427_030038400		208.777	149.755	143.286
Tb427_080024100		208.621	230.844	219.681
Tb427_030052200		208.579	136.806	125.747
Tb427_060013400		208.487	188.793	188.568
Tb427_100081800		208.09	217.444	235.509
Tb427_070050400		207.787	201.249	205.479
Tb427_050008000		207.655	149.084	130.831
Tb427_110187100		207.534	229.409	248.263
Tb427_070037200		207.455	205.609	187.827
Tb427_040009400		207.384	234.726	233.429
Tb427_100005100		207.369	221.133	231.366
Tb427_110104700		207.348	225.169	212.338
Tb427_110057900		207.313	233.164	240.018
Tb427_050008100		207.181	151.949	133.149
Tb427_070039800		207.147	204.273	200.841
Tb427_100156500		207.11	257.599	230.054
Tb427_070030400		207.083	241.843	228.023
Tb427_100091700		206.832	132.92	130.143
Tb427_080042500		206.713	259.48	233.321
Tb427_110155500		206.582	242.832	240.657
Tb427_100148500		206.578	215.05	188.781
Tb427_090073700		206.179	203.673	210.87
Tb427_050044000		206.048	133.038	140.487
Tb427_100156400		206.041	203.063	185.941
Tb427_060013300		205.221	177.512	180.045
Tb427_030054100		204.585	151.61	145.445
Tb427_100037100		204.357	270.186	323.038
Tb427_100051700		204.35	212.499	204.566
Tb427_100028700		204.343	115.266	145.93
Tb427_100064500		204.317	237.207	210.437
Tb427_050050700		204.194	131.253	122.629
Tb427_020019500		204.007	212.827	234.52
Tb427_100065000		202.967	213.787	221.498
Tb427_030050600		202.606	153.919	135.805
Tb427_110167200		202.54	211.829	192.079
Tb427_090074300		202.344	196.788	208.689
Tb427_110153400		201.7	195.398	143.05
Tb427_060029100		201.132	215.11	199.333
Tb427_040050500		201.126	191.849	213.031
Tb427_050035000		200.964	138.242	123.162
Tb427_060031100		200.921	217.66	218.842
Tb427_090052300		200.84	160.96	159.674
Tb427_110093600		200.729	174.636	183.815
Tb427_030030900		199.509	128.205	130.261
Tb427_100146700		199.061	326.006	274.995
Tb427_110018800		199.023	178.23	187.208
Tb427_020031600		198.631	232.346	188.885
Tb427_100160100		198.628	263.1	258.072
Tb427_080088400		198.578	177.728	165.333
Tb427_100145200		198.54	199.386	203.99
Tb427_080045900		198.522	180.785	151.736
Tb427_110138000		198.378	183.361	137.812
Tb427_080053300		197.415	208.382	194.209
Tb427_080088800		197.211	192.2	182.87
Tb427_040006200		197.162	231.003	198.234
Tb427_110042100		196.65	171.751	166.128
Tb427_030027100		196.637	139.677	127.987
Tb427_090074000		196.614	199.041	205.574
Tb427_050014200		196.364	177.506	148.576
Tb427_100081000		195.962	251.533	213.566
Tb427_100053900		195.714	175.731	199.78
Tb427_020005200		195.707	263.927	258.876
Tb427_030009900		195.517	144.396	126.726
Tb427_110035300		194.993	200.611	188.034
Tb427_010015900		194.887	144.851	166.314
Tb427_090029200		194.792	184.751	210.526
Tb427_060010400		194.685	197.693	183.303
Tb427_110023700		194.661	211.716	220.238
Tb427_060016200		194.603	209.331	204.902
Tb427_080022900		194.184	201.185	176.29
Tb427_040022300		193.753	213.395	198.605
Tb427_080006700		193.729	184.045	180.899
Tb427_060017600		193.064	233.609	215.592
Tb427_080022300		192.748	402.947	327.852
Tb427_100110600		192.527	220.063	210.521
Tb427_090065900		192.335	233.133	204.068
Tb427_050007900		192.185	137.356	120.889
Tb427_100102600		192.081	198.239	189.639
Tb427_050046900		191.168	132.368	93.4369
Tb427_100127500		191.028	184.209	178.669
Tb427_100105100		190.918	223.119	207.812
Tb427_090082200		190.538	199.662	195.199
Tb427_050043600		190.494	136.484	120.471
Tb427_100077400		190.247	314.871	273.278
Tb427_070075900		190.141	167.393	183
Tb427_070032900		189.777	176.728	210.625
Tb427_030058400		189.699	137.088	125.82
Tb427_080045400		189.596	185.552	151.031
Tb427_100146000		189.55	197.454	188.823
Tb427_070033100		189.359	187.129	207.784
Tb427_080012300		189.257	210.199	181.747
Tb427_110160900		189.056	194.642	190.315
Tb427_100136800		188.389	197.775	175.253
Tb427_060054500		188.37	180.973	191.574
Tb427_060045000		188.248	213.161	192.965
Tb427_100071200		188.168	216.353	195.653
Tb427_060051100		187.68	211.169	180.303
Tb427_000012500		187.312	5.81828	8.02803
Tb427_110010200		186.979	215.894	238.96
Tb427_100087000		186.852	212.518	245.123
Tb427_100161900		186.822	207.164	201.504
Tb427_070032300		186.457	224.797	222.28
Tb427_070022200		186.361	310.652	291.122
Tb427_080047100		186.203	197.563	172.955
Tb427_070034300		186.009	188.009	213.071
Tb427_110150100		186.006	186.993	169.671
Tb427_030042500		185.933	134.737	111.243
Tb427_070006600		185.846	176.036	169.386
Tb427_080023200		185.803	201.908	194.238
Tb427_100037000		185.732	202.248	212.255
Tb427_030033000		185.724	98.3566	114.348
Tb427_030053500		185.679	141.687	108.183
Tb427_050053000		185.602	154.57	162.977
Tb427_100029600		185.463	199.64	194.344
Tb427_010023000		185.28	169.305	181.254
Tb427_040022800		184.836	194.889	159.803
Tb427_020023200		184.736	191.13	211.549
Tb427_110014900		184.691	189.203	197.697
Tb427_070033400		184.669	175.448	211.729
Tb427_100094000		184.052	173.158	164.785
Tb427_100017200:pseudogene		184.019	193.175	176.61
Tb427_060032500		183.98	232.623	225.777
Tb427_100156100		183.836	209.075	197.745
Tb427_070049600		183.815	218.682	192.209
Tb427_100161200		183.459	184.097	164.911
Tb427_110143500		183.378	203.064	177.608
Tb427_100051200		183.358	206.618	189.448
Tb427_050053500		183.256	112.28	98.6668
Tb427_100132500		183.232	128.14	155.327
Tb427_080081900		183.219	158.2	163.263
Tb427_080070100		183.21	190.17	171.201
Tb427_050018300		183.176	139.495	105.359
Tb427_070033200		183.161	180.808	221.278
Tb427_030057000		183.14	134.293	97.1885
Tb427_100048500		183.003	188.255	181.482
Tb427_030026600		182.983	144.76	143.82
Tb427_070034500		182.575	180.808	217.017
Tb427_070033000		182.407	177.208	211.493
Tb427_040005500		182.389	190.719	173.414
Tb427_100005700		182.319	203.198	201.598
Tb427_100168800		182.225	205.294	172.621
Tb427_030038900		182.024	118.627	127.077
Tb427_050022100		181.677	122.788	125.778
Tb427_110042200		181.576	181.393	175.374
Tb427_050013600		181.534	124.852	131.575
Tb427_070033700		181.402	177.768	213.15
Tb427_070015000		181.374	193.439	197.314
Tb427_050010300		181.342	140.491	130.09
Tb427_030059300		181.132	127.169	116.916
Tb427_110052400		181.094	195.597	144.537
Tb427_070034400		181.067	176.888	198.235
Tb427_110133300		181.018	212.888	245.753
Tb427_070034200		180.984	182.088	216.464
Tb427_110122100		180.9	176.426	164.909
Tb427_110142600		180.766	172.468	173.057
Tb427_070033500		180.565	184.169	211.729
Tb427_090084600		180.51	170.902	142.645
Tb427_050041000		180.108	142.002	141.301
Tb427_090068900		180.105	185.212	183.358
Tb427_040015000		179.573	199.668	183.658
Tb427_050014300		179.487	112.602	104.538
Tb427_110130800		179.409	201.412	196.33
Tb427_070032800		179.309	175.688	217.332
Tb427_110145300		179.305	193.67	189.041
Tb427_100091600		179.101	113.446	104.578
Tb427_100024300		178.91	197.606	166.195
Tb427_090054400		178.74	187.401	173.629
Tb427_080059900		178.68	178.462	184.661
Tb427_110053700		178.455	174.635	167.309
Tb427_070033900		178.387	193.289	208.178
Tb427_100016900		177.965	228.879	225.493
Tb427_100145900		177.793	177.489	172.479
Tb427_100091500		177.731	114.694	108.573
Tb427_060045200		177.73	192.087	189.076
Tb427_090032200		177.225	186.819	183.507
Tb427_100153200		177.167	160.545	149.732
Tb427_060018300		177.091	186.727	166.554
Tb427_110029900		177.064	208.831	229.77
Tb427_070034000		176.964	184.569	209.046
Tb427_050044600		176.763	109.342	102.034
Tb427_100091400		176.682	109.723	111.963
Tb427_030024500		176.271	158.351	127.843
Tb427_020011800		176.054	143.921	126.405
Tb427_070034600		175.875	176.248	216.701
Tb427_070006300		175.841	179.271	163.077
Tb427_100091300		175.825	110.848	107.282
Tb427_040043100		175.725	205.168	190.535
Tb427_070005500		175.609	209.319	215.882
Tb427_110070700		175.562	151.225	144.329
Tb427_100087200		175.426	170.636	171.375
Tb427_110076600		175.341	193.621	182.264
Tb427_070032700		175.205	175.528	213.781
Tb427_100017800		175.041	172.513	175.299
Tb427_070033600		175.037	186.809	209.914
Tb427_040037300		174.903	220.142	195.006
Tb427_090044700		174.788	175.946	140.152
Tb427_070044800		174.77	191.156	189.646
Tb427_010030100		174.757	157.076	168.732
Tb427_050011800		174.425	125.572	127.548
Tb427_110063300		174.407	194.16	213.774
Tb427_030051800		174.289	120.65	120.507
Tb427_050035800		174.135	147.568	147.398
Tb427_070033300		173.697	177.208	214.807
Tb427_110038900		173.386	191.675	149.082
Tb427_030045000		173.339	129.088	103.567
Tb427_050013500		173.019	125.539	131.124
Tb427_080063300:pseudogene		172.906	198.33	142.907
Tb427_110007100		172.824	168.061	178.418
Tb427_040012700		172.665	179.454	182.435
Tb427_090064700		172.597	168.167	168.334
Tb427_090088100		172.112	168.144	170.844
Tb427_080050100		171.626	180.635	153.698
Tb427_100148300		171.567	173.134	171.26
Tb427_040006000		171.377	196.147	173.918
Tb427_100031000		171.299	172.625	158.335
Tb427_030014700		171.227	92.6724	97.1302
Tb427_030059100		170.816	144.201	148.67
Tb427_070048000		170.625	171.822	154.861
Tb427_110107500		170.61	173.603	157.452
Tb427_100083400		170.573	182.653	184.541
Tb427_070026600		170.309	183.335	184.077
Tb427_090029300		170.259	169.631	173.645
Tb427_000018900:pseudogene		169.988	1.19308	0.991028
Tb427_080017800		169.869	156.85	158.736
Tb427_070034100		169.845	182.088	208.731
Tb427_070054700		169.685	174.238	183.183
Tb427_110042700		169.594	177.158	181.85
Tb427_100144500		169.474	176.279	157.979
Tb427_100083700		169.42	184.933	155.476
Tb427_110011000		169.334	178.27	186.764
Tb427_100061800		169.333	187.494	189.295
Tb427_090061000		169.248	221.287	188.511
Tb427_010020800		168.999	181.335	153.635
Tb427_100106900		168.598	185.369	173.836
Tb427_080029600		168.437	181.144	180.898
Tb427_100128300		168.337	195.978	180.564
Tb427_110005200		168.309	174.649	197.333
Tb427_100018700		167.884	184.153	165.98
Tb427_070057300		167.866	170.708	157.806
Tb427_020022000		167.842	205.708	204.068
Tb427_100031800		167.677	173.833	176.235
Tb427_030017600		167.585	131.494	142.526
Tb427_080086000		167.398	170.816	153.028
Tb427_070076500		167.022	191.995	204.089
Tb427_100135400		166.884	152.187	139.4
Tb427_110168700		166.727	178.751	177.593
Tb427_080046800		166.718	174.04	149.15
Tb427_080010100		165.884	182.461	168.592
Tb427_110008500		165.671	157.856	147.447
Tb427_030031600		165.549	119.42	112.512
Tb427_020017500		165.337	167.887	157.734
Tb427_110040000		165.221	164.265	161.697
Tb427_090043300		165.042	166.081	152.806
Tb427_110175300		164.897	151.373	141.119
Tb427_030033900		164.578	135.158	130.243
Tb427_090049000		164.472	173.67	179.198
Tb427_110082700		164.458	178.538	165.74
Tb427_030029500		164.308	114.592	87.1084
Tb427_090019800		164.238	155.755	147.281
Tb427_050021000		164.226	131.399	126.567
Tb427_110105000		164.129	157.867	137.875
Tb427_110013700		164.023	113.823	122.464
Tb427_100070900		163.752	175.105	175.081
Tb427_100015400		163.693	164.243	149.74
Tb427_110095500		163.396	145.927	147.098
Tb427_080047700		163.262	184.041	185.542
Tb427_070037600		163.258	132.476	155.326
Tb427_090022800		163.148	184.146	180.917
Tb427_050007800		162.991	112.498	100.355
Tb427_030010800		162.805	115.755	112.063
Tb427_030037800		162.691	108.542	103.004
Tb427_070048300		162.575	180.89	147.112
Tb427_030043300		162.281	110.966	110.127
Tb427_100007300		162.132	166.832	148.653
Tb427_040037100		162.09	165.346	159.997
Tb427_050053100		162.084	115.72	103.127
Tb427_080023900		161.734	193.023	186.75
Tb427_100030800		161.685	179.076	149.922
Tb427_030043700		161.25	96.2613	111.662
Tb427_050051200		161.216	97.3232	95.514
Tb427_050048300		161.209	114.508	118.51
Tb427_110024700		161.192	185.822	177.559
Tb427_090038700		161.153	175.337	153.699
Tb427_030017300:pseudogene		161.06	112.64	118.454
Tb427_090055500		160.899	152.607	145.759
Tb427_090027200		160.872	124.669	136.67
Tb427_100072500		160.8	163.969	159.255
Tb427_070033800		160.297	160.967	194.368
Tb427_110054200		160.215	178.002	162.785
Tb427_080088300		159.921	163.979	154.78
Tb427_090044000		159.119	218.936	237.692
Tb427_060023000		159.106	157.869	149.1
Tb427_100143100:pseudogene		159.081	163.997	172.326
Tb427_070005800		158.954	145.449	141.82
Tb427_030015600		158.947	110.427	114.036
Tb427_070081200		158.779	158.094	182.654
Tb427_030043900		158.713	95.8545	120.29
Tb427_110068600		158.7	171.795	146.209
Tb427_080007300		158.632	136.895	159.347
Tb427_040036000		158.194	148.339	140.485
Tb427_100015300		158.142	166.003	128.828
Tb427_080035500		157.926	154.123	147.999
Tb427_110111000		157.911	178.671	175.276
Tb427_090055800		157.881	182.132	183.946
Tb427_070015200		157.649	149.132	169.915
Tb427_020030700		157.581	171.94	179.208
Tb427_000832000		157.354	66.3235	123.279
Tb427_110078400		157.354	178.785	172.422
Tb427_110131100		157.128	170.835	169.535
Tb427_040050400		156.626	162.395	170.991
Tb427_090084100		156.353	160.304	143.287
Tb427_070041600		156.172	160.048	144.82
Tb427_020005400		156.164	195.944	200.308
Tb427_040015600		156.114	167.57	139.245
Tb427_090056600		155.764	159.018	121.755
Tb427_000018700		155.728	1.93594	1.70859
Tb427_030053200:pseudogene		155.62	94.0683	96.636
Tb427_070017100		155.496	156.852	143.669
Tb427_110188500		155.495	177.883	174.179
Tb427_040007800		155.43	168.192	163.367
Tb427_050040000		155.402	125.629	129.536
Tb427_110159900		155.279	171.981	163.884
Tb427_060051900		154.571	157.435	145.262
Tb427_000666300		154.541	193.259	197.816
Tb427_030032500		154.294	106.719	94.4868
Tb427_110169500		154.119	153.973	117.832
Tb427_030009000		154.094	96.0034	103.42
Tb427_030057800		154.089	122.578	100.269
Tb427_110082300		153.998	156.247	151.737
Tb427_110020300		153.928	164.805	184.127
Tb427_050042100		153.911	121.593	98.533
Tb427_110059600		153.662	140.425	141.178
Tb427_010020200		153.47	147.908	147.264
Tb427_090060100		153.442	152.783	136.456
Tb427_050021500		153.375	88.0755	80.5992
Tb427_100053500:pseudogene		153.27	152.537	138.225
Tb427_030024800		153.15	108.644	107.53
Tb427_070028600		153.075	176.791	169.802
Tb427_050024700		153.001	84.3	89.2408
Tb427_070039000		152.962	167.291	157.365
Tb427_030015700		152.909	122.58	136.221
Tb427_100130300		152.817	160.585	156.023
Tb427_090053200		152.669	143.025	141.079
Tb427_110088900		152.634	163.579	147.552
Tb427_110043000		152.608	149.007	146.801
Tb427_010007800		152.571	166.665	164.516
Tb427_050025300		152.551	93.6868	88.6982
Tb427_100109300		152.325	144.179	135.067
Tb427_050014400		152.25	95.1688	99.619
Tb427_020015600		152.096	147.95	145.429
Tb427_110088100		152.024	144.922	126.618
Tb427_110075700		151.476	159.301	153.334
Tb427_100099700		151.462	173.528	174.047
Tb427_030030600		151.308	101.148	99.715
Tb427_030047900		151.103	108.218	89.007
Tb427_110180900		151.013	156.398	156.335
Tb427_050025700		150.986	101.423	102.374
Tb427_090024700		150.841	215.165	207.373
Tb427_030013800		150.727	101.824	101.594
Tb427_110159800		150.538	179.113	165.596
Tb427_060018100		150.528	141.044	138.662
Tb427_070047100		150.099	278.192	253.257
Tb427_080048700		150.074	186.258	164.527
Tb427_060049900		149.958	152.137	159.978
Tb427_030010400		149.808	112.977	105.436
Tb427_110102100		149.586	168.08	170.8
Tb427_030052500		149.512	107.791	100.741
Tb427_080006100		149.187	178.603	184.228
Tb427_030032000		148.951	97.8591	99.5945
Tb427_090046900		148.917	169.109	167.173
Tb427_050008400		148.825	102.951	81.3544
Tb427_110050400		148.442	145.627	137.342
Tb427_100150100		148.428	146.282	151.11
Tb427_060008300		148.259	160.317	212.7
Tb427_020023700		148.233	159.062	148.855
Tb427_030006000		148.036	113.477	112.359
Tb427_090056100		147.993	154.106	150.613
Tb427_000667300		147.918	178.688	194.79
Tb427_030031000		147.825	101.678	93.5366
Tb427_080085500		147.774	122.253	135.417
Tb427_040052500		147.771	138.063	158.236
Tb427_050017000		147.168	100.976	86.8132
Tb427_110088800		147.145	147.45	120.123
Tb427_080051400		147.011	136.153	120.391
Tb427_100145400		146.981	153.663	142.558
Tb427_110047200		146.919	167.081	151.222
Tb427_030020700		146.871	110.836	101.502
Tb427_020016900		146.669	169.382	154.807
Tb427_070082800		146.614	303.16	230.654
Tb427_050053300		146.512	108.519	104.857
Tb427_040009500		146.356	142.713	135.11
Tb427_010032600		146.314	134.007	97.5385
Tb427_070041500		146.301	149.551	155.331
Tb427_040050800		146.289	136.989	157.96
Tb427_010027700		146.287	185.555	196.004
Tb427_060046700		146.227	168.848	138.07
Tb427_100041000		145.672	152.571	130.571
Tb427_100052500		145.669	135.872	139.026
Tb427_040033000:pseudogene		145.66	151.768	144.653
Tb427_110026200		145.496	162.878	156.432
Tb427_040024500		145.427	136.019	134.568
Tb427_090053700		145.192	136.055	123.623
Tb427_080018000		144.869	138.191	139.003
Tb427_040018700		144.76	174.772	148.931
Tb427_080017400		144.725	148.632	157.004
Tb427_110028900		144.606	145.388	125.556
Tb427_070047700		144.593	148.972	130.965
Tb427_040051900		144.499	162.63	194.15
Tb427_110183100		144.462	144.633	137.107
Tb427_030044200		144.281	83.18	99.2211
Tb427_100140000		144.244	145.532	137.49
Tb427_100154600:pseudogene		144.233	164.675	150.55
Tb427_000729100		144.157	157.975	159.596
Tb427_030014900		144.089	99.2976	97.864
Tb427_030029400		144.074	107.285	88.1708
Tb427_030044700		143.997	92.3745	74.9719
Tb427_080077300		143.924	160.493	168.909
Tb427_090063000		143.86	140.113	125.336
Tb427_040023200		143.84	141.157	119.374
Tb427_020015300		143.773	125.207	111.07
Tb427_110059500		143.699	226.333	243.749
Tb427_110017800		143.65	162.586	154.191
Tb427_070069700		143.543	135.038	111.582
Tb427_100050300		143.351	160.521	153.059
Tb427_110188100		143.332	158.964	157.769
Tb427_010019800		143.243	133.605	130.606
Tb427_050021300		143.128	96.7878	96.7041
Tb427_050008200		143.119	106.232	89.8842
Tb427_020020500		143.011	133.446	121.498
Tb427_020008700		142.941	164.756	144.603
Tb427_020021500		142.87	150.323	143.726
Tb427_070076700		142.714	139.607	133.712
Tb427_030051600		142.326	93.0043	91.913
Tb427_110027900		142.264	164.606	140.965
Tb427_050031700		141.866	96.2915	88.7182
Tb427_110028500		141.608	136.501	130.979
Tb427_090018600		141.604	135.797	125.764
Tb427_110177600		141.46	147.083	147.96
Tb427_110150700		141.439	156.219	139.889
Tb427_100087100		141.328	172.302	175.451
Tb427_100010700		141.195	152.993	145.123
Tb427_110036200		141.19	138.727	140.526
Tb427_110015700		141.152	113.889	119.241
Tb427_030051000		141.131	106.812	103.36
Tb427_020010400		141.104	134.87	111.958
Tb427_100051800		140.936	153.744	151.819
Tb427_030032600		140.732	92.3735	95.3356
Tb427_060047400		140.732	134.163	143.261
Tb427_030005700		140.673	96.741	97.3451
Tb427_080063200		140.594	174.883	174.068
Tb427_100085200		140.566	139	122.293
Tb427_090082100		140.556	150.853	154.156
Tb427_090085100		140.4	119.45	131.091
Tb427_100109600		140.309	122.583	132.325
Tb427_070011800		140.288	174.104	180.855
Tb427_060043700		140.197	159.697	148.307
Tb427_100040000		140.158	149.161	126.247
Tb427_080044700		140.065	157.962	128.758
Tb427_050033400		140.046	97.4454	99.0899
Tb427_110085600		139.974	132.477	134.331
Tb427_100018000		139.926	163.654	164.841
Tb427_040010800		139.866	141.244	135.741
Tb427_030013200		139.439	94.1579	95.0156
Tb427_100138200		139.38	155.11	145.658
Tb427_100053100		139.248	152.914	151.813
Tb427_000018800:pseudogene		139.132	1.02649	0.264138
Tb427_100143600:pseudogene		139.069	134.459	130.898
Tb427_060007900		139.024	151.706	142.883
Tb427_090013600		139.01	120.903	130.219
Tb427_030030700		138.991	89.4282	99.149
Tb427_100136600		138.841	122.328	125.843
Tb427_090048500		138.799	137.991	129.244
Tb427_100120300		138.292	156.254	159.059
Tb427_090048100		138.264	145.188	154.11
Tb427_080063000		138.224	159.527	147.281
Tb427_090081900		138.023	144.951	144.201
Tb427_100017300		137.743	136.192	137.63
Tb427_110054100		137.549	132.186	135.097
Tb427_100057100		137.446	154.243	143.973
Tb427_050033600		137.112	88.1888	86.9664
Tb427_070027500		136.955	126.142	107.641
Tb427_010022300		136.904	135.293	121.975
Tb427_070076200		136.803	140.479	144.066
Tb427_080079000		136.677	140.407	134.56
Tb427_110061900		136.532	130.016	130.418
Tb427_090065400		136.52	144.519	140.032
Tb427_080007100		136.455	146.738	140.7
Tb427_080057800		136.419	127.596	127.662
Tb427_110169900		136.37	134.807	131.718
Tb427_040055500		136.34	137.103	267.091
Tb427_100045800		136.286	142.012	163.546
Tb427_110069600		136.101	103.504	112.024
Tb427_110010900		136.028	158.857	154.92
Tb427_030005500		135.962	84.848	88.2078
Tb427_050029500		135.828	85.2364	80.1895
Tb427_100015900		135.805	142.765	147.007
Tb427_110184700		135.752	177.657	167.63
Tb427_100153600		135.586	145.863	131.106
Tb427_090071400		135.51	167.92	160.114
Tb427_040005900		135.44	109.885	112.43
Tb427_020015500		135.39	128.617	106.926
Tb427_110181000		135.377	137.735	126.441
Tb427_080026300:pseudogene		135.176	121.347	96.7697
Tb427_080059200		135.098	176.996	180.349
Tb427_090059000		135.085	130.827	119.505
Tb427_090031200		135.062	132.339	116.355
Tb427_040043200		134.832	140.675	153.464
Tb427_110152900		134.699	149.809	153.927
Tb427_060044400		134.529	136.649	129.36
Tb427_100089700		134.521	143.713	149.693
Tb427_060046200		134.491	152.133	163.76
Tb427_060054700		134.426	139.541	129.049
Tb427_040030800		134.318	131.118	130.229
Tb427_070008100		134.271	150.265	127.664
Tb427_030056200		134.01	103.499	89.8035
Tb427_090039600		133.983	137.345	152.589
Tb427_110041000		133.976	144.804	138.631
Tb427_070012400		133.968	143.832	146.433
Tb427_060054900		133.945	156.755	171.155
Tb427_100017700		133.8	159.96	144.605
Tb427_110172200		133.789	136.813	131.059
Tb427_030028000		133.76	88.6556	88.074
Tb427_060053800		133.402	152.184	155.279
Tb427_030041600		133.135	101.979	98.9699
Tb427_100069300		133.023	157.007	138.233
Tb427_090075000		133	134.645	109.627
Tb427_090034200		132.741	138.834	136.271
Tb427_080087100		132.709	144.833	140.359
Tb427_110123200		132.709	136.587	130.395
Tb427_010024300		132.692	122.715	124.444
Tb427_100046700		132.685	155.581	178.557
Tb427_050016300		132.684	85.4018	85.3612
Tb427_050040400		132.445	111	105.461
Tb427_090012800		132.337	139.224	133.017
Tb427_050012600		132.225	88.9953	92.2626
Tb427_110075200		132.204	121.174	141.019
Tb427_030051300		131.785	114.21	121.832
Tb427_050032000		131.703	106.691	93.4345
Tb427_110190000		131.697	181.808	154.871
Tb427_100054600		131.51	177.924	177.886
Tb427_110187200		131.505	125.594	120.98
Tb427_020016400		131.497	149.094	119.158
Tb427_110135500		131.482	115.635	120.207
Tb427_100135300		131.393	129.116	122.358
Tb427_040025700		131.386	158.358	149.517
Tb427_100077200		131.374	135.669	116.209
Tb427_110019000		131.282	146.09	148.675
Tb427_090054700		131.216	145.183	155.431
Tb427_040046200		131.145	127.321	136.703
Tb427_110027400		131.143	145.593	144.926
Tb427_110150500		131.044	118.367	126.231
Tb427_050039900		130.964	101.03	85.8942
Tb427_110170300		130.93	132.403	107.106
Tb427_050026400:pseudogene		130.93	92.6717	98.0347
Tb427_110049900		130.871	122.934	113.462
Tb427_090049500		130.867	156.049	171.681
Tb427_110059000		130.829	145.035	156.506
Tb427_050030100		130.798	88.2329	86.1814
Tb427_100165600		130.774	142.162	131.621
Tb427_040020000		130.523	156.949	131.214
Tb427_060036900		130.423	115.892	104.98
Tb427_080084200		130.393	136.865	131.336
Tb427_060012900		130.338	137.067	132.37
Tb427_090046300		130.159	144.923	132.395
Tb427_060051700		130.101	121.347	132.617
Tb427_110051000		129.931	124.227	121.536
Tb427_080031600		129.838	127.575	134.007
Tb427_030049400		129.771	90.1542	87.073
Tb427_090072800		129.686	116.879	114.065
Tb427_060054000		129.624	150.42	151.318
Tb427_100062700		129.508	129.077	108.621
Tb427_100011500		129.48	135.772	112.658
Tb427_090076100		129.072	127.964	130.314
Tb427_050037200		129.046	89.57	93.9845
Tb427_030029000		128.986	90.8149	90.7585
Tb427_110125200		128.955	143.7	148.764
Tb427_090045900		128.847	124.558	118.191
Tb427_030040700		128.82	87.1567	85.3397
Tb427_100122800		128.776	142.878	149.511
Tb427_110163900		128.712	136.669	128.857
Tb427_060053700		128.687	152.211	156.19
Tb427_010010100		128.59	123.702	134.235
Tb427_000008200		128.548	5.64766	8.28048
Tb427_010016600		128.399	134.274	117.189
Tb427_030023400		128.389	98.8846	79.7832
Tb427_110169300		128.353	143.698	134.438
Tb427_110073000		128.287	119.068	122.638
Tb427_030011800		128.083	82.2346	83.2267
Tb427_110159000		128.009	134.235	124.992
Tb427_100127400		127.987	139.542	140.733
Tb427_110056500		127.979	130.93	126.399
Tb427_070081900		127.828	150.93	180.273
Tb427_040021500		127.825	131.555	134.976
Tb427_110146100		127.775	133.653	129.029
Tb427_050013300		127.772	81.1966	84.2228
Tb427_030040500		127.757	86.7427	86.4534
Tb427_110137100		127.719	158.307	143.922
Tb427_110106300		127.678	127.828	124.465
Tb427_110099900		127.64	126.492	126.165
Tb427_080039100		127.463	129.205	111.502
Tb427_110035700		127.406	117.982	110.044
Tb427_110085100		127.18	130.692	123.502
Tb427_090062400		126.975	137.435	130.575
Tb427_040022900		126.969	139.008	126.681
Tb427_090011500		126.952	113.429	113.148
Tb427_050045100		126.907	72.5125	69.1464
Tb427_110093900		126.9	129.122	120.263
Tb427_060023100		126.888	118.902	129.21
Tb427_060036300		126.881	121.969	115.109
Tb427_030044100		126.74	87.3645	74.2888
Tb427_090025700		126.652	134.98	121.287
Tb427_010023900		126.648	127.386	125.358
Tb427_060035100		126.539	126.635	117.708
Tb427_060014500		126.496	131.852	143.032
Tb427_030039600		126.417	90.7086	102.675
Tb427_070083400		126.408	113.214	112.18
Tb427_100131700		126.334	122.86	107.339
Tb427_040023000		126.29	115.236	114.018
Tb427_060054200		126.244	152.021	155.44
Tb427_110046500		126.189	130.858	135.94
Tb427_030047800		126.128	84.7232	83.8161
Tb427_050023000		126.11	81.5181	82.7595
Tb427_110183600		126.073	115.482	113.616
Tb427_110173400		126.046	109.297	119.993
Tb427_050047700		125.957	77.1209	79.5494
Tb427_100155800		125.926	149.224	131.825
Tb427_090083600		125.905	125.464	110.983
Tb427_050012200		125.876	99.1589	96.3385
Tb427_070057800		125.777	146.221	131.552
Tb427_070026300		125.582	125.605	113.386
Tb427_040020400		125.549	128.855	104.405
Tb427_020008100		125.499	128.624	114.348
Tb427_020015400		125.356	130.463	134.015
Tb427_100147300		125.281	127.516	124.234
Tb427_070045200		125.118	120.381	132.128
Tb427_030017500		124.978	102.439	93.9971
Tb427_070063400		124.951	116.582	110.217
Tb427_090042600		124.923	122.011	127.229
Tb427_100164400		124.885	126.371	137.306
Tb427_060055500		124.871	123.606	113.543
Tb427_060054100		124.823	140.786	146.553
Tb427_060055100		124.78	109.548	117.244
Tb427_060038000		124.628	123.423	117.433
Tb427_110014200		124.608	109.264	105.587
Tb427_110145600		124.493	125.735	102.105
Tb427_100093300:pseudogene		124.402	117.977	119.232
Tb427_110053900		124.369	120.141	115.639
Tb427_070054400		124.319	115.49	118.404
Tb427_050052000		124.301	98.0413	93.0884
Tb427_050038200		124.144	87.7912	85.489
Tb427_070070100		124.115	135.418	133.241
Tb427_070030500		123.956	121.88	113.767
Tb427_100005500		123.855	125.608	133.677
Tb427_090005500		123.824	117.114	118.986
Tb427_110021600		123.816	112.29	111.573
Tb427_090048000		123.785	109.817	100.143
Tb427_050022700		123.709	80.2223	74.5058
Tb427_100120200		123.659	123.736	113.406
Tb427_090085800		123.561	133.926	133.017
Tb427_040042900		123.554	124.961	129.942
Tb427_080058500		123.525	131.621	112.816
Tb427_100025900		123.485	101.93	92.3862
Tb427_050045700		123.428	85.7371	81.5962
Tb427_110092100		123.427	124.693	110.716
Tb427_110167400		123.395	124.089	123.548
Tb427_110077300		123.388	131.59	128.93
Tb427_100149400		123.355	115.23	103.89
Tb427_110030300		123.306	116.993	126.52
Tb427_110158800		123.252	111.997	129.759
Tb427_030021100		123.201	85.5391	88.3492
Tb427_100101800		123.198	125.217	96.5186
Tb427_050020500		122.989	94.6783	79.4502
Tb427_100101700		122.977	109.667	93.5873
Tb427_090035500		122.908	146.122	134.634
Tb427_060011900		122.9	131.107	115.322
Tb427_090081000		122.802	114.207	102.867
Tb427_100076200		122.709	90.4914	107.659
Tb427_050027400		122.622	74.1665	82.8736
Tb427_050047100		122.545	65.3837	71.9401
Tb427_080066300		122.526	158.914	156.989
Tb427_080058600		122.451	131.872	132.836
Tb427_110149600		122.414	133.919	114.132
Tb427_060020600		122.406	122.692	124.891
Tb427_100046900		122.4	125.501	114.407
Tb427_050033900		122.33	80.7888	69.3104
Tb427_050023800		122.272	76.6487	73.8016
Tb427_070039500		122.268	142.127	122.846
Tb427_060042500		122.249	113.743	114.193
Tb427_100070700		122.231	118.256	115.02
Tb427_110170800		122.196	132.577	114.77
Tb427_110146300		122.18	125.425	128.644
Tb427_060008200		122.13	133.509	122.885
Tb427_100170400		122.036	132.949	142.132
Tb427_030054300		122.01	76.8825	82.9054
Tb427_090023300		121.75	124.48	116.587
Tb427_100040200		121.731	128.221	127.187
Tb427_030018700		121.606	83.8672	77.8101
Tb427_070043000		121.503	129.436	124.452
Tb427_110178400		121.497	109.377	94.8724
Tb427_030028900		121.364	83.4746	80.5
Tb427_030050900		121.348	114.384	118.924
Tb427_110015400		121.282	107.705	103.254
Tb427_060047500		121.263	127.073	133.564
Tb427_100132000		121.237	111.216	110.998
Tb427_100061200		121.187	105.854	108.611
Tb427_110066500		121.182	137.332	139.289
Tb427_110088000		121.175	131.399	120.015
Tb427_080019600		121.106	122.621	109.133
Tb427_030009500		120.925	79.2134	86.8939
Tb427_060051500		120.857	133.285	131.79
Tb427_100005200		120.822	145.171	154.929
Tb427_030010500		120.688	79.12	82.3792
Tb427_060053900		120.647	144.341	146.741
Tb427_110179700		120.523	140.884	124.364
Tb427_100150400		120.412	120.831	120.052
Tb427_100118600		120.384	127.988	112.402
Tb427_080022500		120.366	122.207	116.577
Tb427_100151800		120.331	117.042	117.733
Tb427_090050200		120.284	123.176	121.069
Tb427_050033000		120.272	80.8093	73.585
Tb427_050015700		120.25	89.845	85.6831
Tb427_100149500		120.157	119.37	109.042
Tb427_070064300		120.141	129.324	104.127
Tb427_050024000		120.141	80.0576	81.9276
Tb427_070047200		120.111	183.609	189.17
Tb427_080049400		120.047	125.93	111.75
Tb427_000481600:pseudogene		119.996	110.45	117.189
Tb427_040012100		119.971	121.357	119.923
Tb427_100084800		119.958	117.963	118.7
Tb427_110066600		119.922	115.016	111.933
Tb427_080087800		119.905	119.672	112.868
Tb427_070028200		119.758	145.964	117.568
Tb427_040050900		119.745	145.416	159.458
Tb427_030036500		119.682	130.054	116.149
Tb427_080061400		119.615	157.402	143.487
Tb427_040040800		119.516	136.884	134.221
Tb427_100013900		119.427	112.12	109.205
Tb427_040037400		119.389	113.341	124.989
Tb427_080028700		119.38	106.976	107.939
Tb427_010021600		119.344	145.425	132.685
Tb427_070036100		119.339	125.472	114.798
Tb427_100128400		119.054	108.744	98.3404
Tb427_080013100		119.048	94.3456	83.6617
Tb427_110164500:pseudogene		118.989	103.011	74.4889
Tb427_110180000		118.94	123.224	126.965
Tb427_060053600		118.886	141.573	142.832
Tb427_050046400		118.824	89.0524	93.6777
Tb427_030045100		118.716	69.0356	62.5296
Tb427_080007600		118.716	106.835	106.18
Tb427_030006200		118.626	77.3179	78.9715
Tb427_030052600		118.611	86.3185	88.2361
Tb427_060045700		118.543	102.316	110.886
Tb427_050036000		118.44	78.7052	83.6167
Tb427_090014400		118.289	102.089	104.341
Tb427_050037900		118.273	74.4588	79.828
Tb427_050026300		118.188	79.4312	81.3357
Tb427_100006200		118.111	111.877	112.365
Tb427_050013800		118.11	82.1732	80.744
Tb427_110020900		117.983	127.144	126.407
Tb427_110070300		117.955	99.6969	94.0637
Tb427_100163800		117.939	123.32	118.416
Tb427_110142100		117.938	110.923	112.278
Tb427_050037600		117.915	85.1218	84.3041
Tb427_080025200		117.883	126.366	104.124
Tb427_110176100		117.818	127.292	125.278
Tb427_090014900		117.799	110.984	93.3839
Tb427_030049700		117.798	97.7909	97.6872
Tb427_040020600		117.783	112.514	104.053
Tb427_020015700		117.771	108.796	93.1027
Tb427_110033400		117.701	142.899	129.755
Tb427_030053800		117.685	79.1591	86.2843
Tb427_040036100		117.671	111.175	101.498
Tb427_080030800		117.532	121.8	125.8
Tb427_080054400		117.29	122.844	110.241
Tb427_110035600		116.935	145.538	135.847
Tb427_070046600		116.891	119.698	112.009
Tb427_030031900		116.799	77.2404	77.9726
Tb427_110129700		116.651	133.8	127.144
Tb427_060018600		116.631	128.96	128.869
Tb427_110076300		116.627	111.961	109.385
Tb427_110176900		116.481	130.073	108.399
Tb427_030059700		116.389	80.2383	80.7191
Tb427_050039500		116.36	81.3538	71.1716
Tb427_110161000		116.196	127.394	131.822
Tb427_110152200		116.012	111.136	100.823
Tb427_080012000		115.845	109.204	109.265
Tb427_060017900		115.806	132.825	126.454
Tb427_110081500		115.788	116.628	108.346
Tb427_030007700		115.709	89.4297	90.8196
Tb427_070079400		115.695	113.627	116.897
Tb427_100155700		115.611	116.399	104.631
Tb427_100054900		115.593	115.205	109.724
Tb427_100132400		115.49	90.9939	103.07
Tb427_110043100		115.386	127.609	129.034
Tb427_080050800		115.352	117.199	105.171
Tb427_050023600		115.213	75.7189	74.848
Tb427_050027800		115.168	82.2401	77.709
Tb427_040020800		115.152	116.866	107.787
Tb427_100163500		115.087	106.101	97.9363
Tb427_000747500		115.027	133.936	127.355
Tb427_070050600		114.927	108.339	106.206
Tb427_110045400		114.827	104.118	96.6623
Tb427_100163900		114.825	113.683	114.592
Tb427_100116000		114.812	122.069	112.026
Tb427_070041200		114.773	121.079	116.138
Tb427_050051900		114.725	82.0203	78.3976
Tb427_080056200		114.725	95.5984	99.1043
Tb427_090029400		114.707	112.522	99.9496
Tb427_090029600		114.612	111.605	101.677
Tb427_080046300		114.603	128.063	123.631
Tb427_070040500		114.486	118.646	109.534
Tb427_090047100		114.436	123.585	123.96
Tb427_050022800		114.432	74.8863	77.4463
Tb427_090050300		114.424	119.38	129.036
Tb427_110177200		114.357	128.72	110.148
Tb427_090047300		114.356	128.531	146.394
Tb427_100053600		114.347	111.114	113.719
Tb427_060030700		114.047	119.572	110.934
Tb427_100086700		114.032	109.517	117.159
Tb427_110110900		113.843	113.495	119.955
Tb427_050006000		113.792	85.2282	93.8629
Tb427_060032000		113.769	113.895	110.231
Tb427_030058500		113.665	83.6879	82.4232
Tb427_110069300		113.655	83.8325	87.9679
Tb427_080066800		113.515	207.197	234.762
Tb427_080082300:pseudogene		113.474	103.292	106.535
Tb427_100109900		113.371	117.038	121.354
Tb427_050026900		113.369	68.6666	71.0814
Tb427_110027300		113.279	105.322	96.8998
Tb427_050024200		113.245	71.9453	80.503
Tb427_070081800		113.236	137.582	160.004
Tb427_090031900		113.159	125.914	118.919
Tb427_110179200		113.119	132.198	133.01
Tb427_070070700		113.105	100.18	104.807
Tb427_090054600		113.095	126.783	123.061
Tb427_110155000		113.089	141.374	136.21
Tb427_050038900		113.02	67.1039	67.1521
Tb427_110109000		112.953	114.611	113.155
Tb427_000730800		112.937	125.891	118.445
Tb427_040017800		112.937	110.621	114.324
Tb427_010030200		112.91	112.201	102.108
Tb427_100018600		112.817	107.692	106.973
Tb427_040019100		112.726	107.913	104.223
Tb427_100083500		112.595	104.921	107.461
Tb427_090060000		112.46	123.279	111.2
Tb427_100168700		112.451	117.69	115.67
Tb427_100135200:pseudogene		112.341	102.222	101.775
Tb427_100096100		112.22	105.407	105.352
Tb427_000286900		112.145	87.8156	73.8365
Tb427_010032200		112.123	103.197	103.704
Tb427_030024400		112.109	77.7279	70.4543
Tb427_100011900		112.071	107.413	108.031
Tb427_100146100		112.068	114.855	107.275
Tb427_030021900		112.039	76.1411	83.3001
Tb427_050047300		111.975	71.5533	72.5261
Tb427_080087700		111.957	123.272	117.59
Tb427_100011100		111.932	110.57	101.342
Tb427_100017900		111.859	107.377	111.727
Tb427_030014800		111.858	89.355	62.6405
Tb427_020010600		111.853	125.182	128.196
Tb427_030045800		111.805	65.2859	65.7569
Tb427_110085200		111.791	185.904	161.135
Tb427_100096900		111.732	132.529	118.254
Tb427_050012100		111.715	67.1469	70.6761
Tb427_100019400		111.649	123.898	112.031
Tb427_020020100		111.64	127.353	120.65
Tb427_000010800		111.562	7.74633	11.1753
Tb427_060026300		111.521	110.951	119.987
Tb427_000665200		111.499	119.415	112.425
Tb427_080073800		111.41	159.355	170.768
Tb427_030038200		111.406	74.8863	74.8037
Tb427_060050900		111.396	121.193	125.263
Tb427_100142400		111.219	101.431	111.013
Tb427_110177500		111.182	112.81	102.785
Tb427_110086500		111.103	107.357	121.379
Tb427_090069200		111.057	130.606	114.313
Tb427_050012700		111.047	68.9796	71.0022
Tb427_100064400		111.041	125.805	123.914
Tb427_110068500		111.036	88.6371	91.9036
Tb427_080053200		110.948	127.43	125.275
Tb427_110090800		110.883	123.581	119.982
Tb427_000667400		110.878	120.436	118.089
Tb427_110043400		110.87	114.658	114.353
Tb427_110101800		110.842	109.665	105.069
Tb427_110131400		110.815	119.871	90.7734
Tb427_100150700		110.786	121.705	115.592
Tb427_110013600		110.77	98.3614	102.459
Tb427_090070700		110.691	113.67	113.315
Tb427_050046100		110.69	69.3032	71.7054
Tb427_030031700		110.667	68.5862	69.6995
Tb427_040011100		110.659	125.141	120.503
Tb427_110127600		110.557	119.912	115.654
Tb427_110069900		110.375	79.7201	91.2101
Tb427_110109200		110.312	114.865	125.731
Tb427_040012000		110.294	100.952	101.1
Tb427_070042900		110.279	116.255	125.541
Tb427_030012100		110.271	70.6366	69.2481
Tb427_110123400		110.265	122.76	111.302
Tb427_050034300		110.208	77.6418	77.186
Tb427_100088900		110.173	111.565	113.756
Tb427_100015600		110.171	113.735	121.865
Tb427_070072000		110.162	101.179	112.08
Tb427_110093700		110.087	104.594	113.264
Tb427_100054200		110.051	125.818	120.612
Tb427_040039100		110.035	104.93	108.486
Tb427_090057300		109.951	102.568	124.103
Tb427_030011200		109.924	74.7964	72.9446
Tb427_030037600		109.901	81.1868	82.5199
Tb427_100032500		109.761	111.669	117.472
Tb427_040015700		109.734	109.826	108.401
Tb427_080023400		109.701	116.85	107.86
Tb427_050017200		109.633	76.8202	78.7846
Tb427_030049100		109.578	73.8725	69.4086
Tb427_070054800		109.543	111.993	111.834
Tb427_110089600		109.525	108.207	107.561
Tb427_070078300		109.497	103.383	100.873
Tb427_100042200		109.4	102.985	98.0952
Tb427_050030700		109.373	74.7172	58.9401
Tb427_110037600		109.313	94.9002	96.401
Tb427_110014500		109.308	100.541	100.468
Tb427_050017700		109.299	78.5516	75.9337
Tb427_050025000		109.238	69.7954	74.719
Tb427_100096800		109.205	125.413	113.116
Tb427_020027300		109.173	116.732	105.939
Tb427_070044100		109.059	194.199	152.839
Tb427_000286100		109.008	78.4298	74.3757
Tb427_060044500		108.995	102.078	103.937
Tb427_110102000		108.926	123.152	118.878
Tb427_050014900		108.904	77.068	73.0039
Tb427_080076700		108.838	118.01	114.049
Tb427_080009200		108.836	114.308	103.038
Tb427_010031000		108.749	95.4384	90.075
Tb427_010031200		108.684	127.577	131.322
Tb427_070029500		108.674	112.567	110.792
Tb427_110081300		108.64	104.869	104.001
Tb427_100154500		108.493	110.635	99.6079
Tb427_090021200		108.463	119.172	126.849
Tb427_100051000		108.46	109.056	99.3703
Tb427_100040800		108.452	103.95	97.33
Tb427_030024600		108.437	79.531	83.2914
Tb427_080005800		108.397	112.722	102.236
Tb427_030058900		108.265	72.7974	72.1255
Tb427_100131000		108.236	111.163	122.858
Tb427_110094600		108.185	102.574	92.2597
Tb427_100160400		108.14	103.567	100.214
Tb427_020010000		108.135	116.515	111.883
Tb427_040015100		108.104	102.754	98.4185
Tb427_110098700		108.059	112.069	102.564
Tb427_080012100		107.961	119.985	111.622
Tb427_100085300		107.939	110.143	118.077
Tb427_010019900		107.921	108.955	94.6506
Tb427_110082500		107.918	100.616	95.3588
Tb427_090011800		107.911	83.7881	80.2721
Tb427_110142500		107.897	95.7791	93.7999
Tb427_100084500		107.87	127.39	128.294
Tb427_110061100		107.786	136.716	129.885
Tb427_030041000		107.673	75.3116	67.8738
Tb427_110164400		107.633	97.2519	74.9954
Tb427_080042200		107.611	120.137	119.32
Tb427_090087200		107.609	117.069	114.265
Tb427_080042600		107.575	113.669	108.562
Tb427_100090000		107.545	135.222	129.888
Tb427_070076600		107.535	102.356	99.1964
Tb427_020031700		107.489	117.263	116.653
Tb427_100098900		107.471	99.2815	94.5356
Tb427_070013300		107.295	102.853	95.9015
Tb427_090036100		107.285	110.336	104.494
Tb427_070060900		107.273	111.814	117.189
Tb427_080020700		107.085	135.797	131.235
Tb427_100058100		107.046	96.3217	96.6601
Tb427_020029700		107.041	114.626	118.74
Tb427_080075200		106.965	130.698	130.476
Tb427_040014500		106.955	103.908	86.7795
Tb427_080058100		106.927	108.424	112.151
Tb427_100146400		106.87	118.402	126.516
Tb427_080033900		106.861	111.689	111.399
Tb427_030060100		106.755	73.4656	67.6459
Tb427_070025700		106.602	112.119	92.6267
Tb427_050042400		106.583	72.9433	72.878
Tb427_060021200		106.554	100.862	92.972
Tb427_050027000		106.524	71.3308	72.0578
Tb427_110159200		106.455	116.225	119.707
Tb427_030053600		106.434	69.4242	69.9186
Tb427_040049300		106.408	105.134	68.3041
Tb427_060023300		106.317	108.187	99.172
Tb427_040048900		106.283	86.8524	140.216
Tb427_100092200		106.185	100.506	93.2581
Tb427_050009400		106.084	78.8099	69.9139
Tb427_100149100		106.047	117.412	121.636
Tb427_030007400		106.043	70.9154	82.6528
Tb427_040042700		106.019	89.7138	88.5791
Tb427_030056300		105.991	73.5185	68.5694
Tb427_040039200		105.972	98.0466	98.8433
Tb427_050037300		105.874	63.997	67.5149
Tb427_030005800		105.868	67.7486	75.0876
Tb427_020009600		105.809	122.066	118.06
Tb427_110072500		105.773	106.473	100.118
Tb427_070022600		105.761	114.98	113.749
Tb427_040019700		105.632	106.167	102.984
Tb427_110186100		105.624	107.231	100.928
Tb427_040018400		105.619	112.805	106.683
Tb427_060016600		105.61	96.8225	89.1335
Tb427_100029200		105.579	117.666	114.083
Tb427_100155100		105.574	105.27	97.058
Tb427_100063100		105.477	100.989	95.4722
Tb427_030047600		105.474	65.4598	71.5995
Tb427_100145800		105.426	98.2467	114.759
Tb427_060031500		105.313	111.1	102.486
Tb427_050030600		105.288	76.6321	69.2988
Tb427_050048000		105.231	75.2097	66.5847
Tb427_110170700		105.163	100.995	99.2332
Tb427_080068000		105.148	94.4226	93.7512
Tb427_050022000		105.126	75.18	70.6059
Tb427_040025800		105.106	108.538	114.953
Tb427_110075300		105.073	90.1482	84.5181
Tb427_100096000		104.915	105.368	106.911
Tb427_100147400		104.812	102.751	86.924
Tb427_100156000		104.719	98.9906	106.519
Tb427_090061900		104.66	108.713	111.95
Tb427_080073600		104.455	86.404	78.0305
Tb427_030055000		104.429	69.1232	61.6614
Tb427_070044400		104.317	117.373	110.714
Tb427_100018500		104.284	123.367	114.829
Tb427_030034300		104.214	67.0405	72.4768
Tb427_000019700		104.068	2.39631	0.776645
Tb427_100126300		104.039	96.5912	102.536
Tb427_000286200		104.038	70.9464	80.7324
Tb427_040036300		103.974	99.8659	102.203
Tb427_090055700		103.916	107.58	103.693
Tb427_110017200		103.884	127.637	128.344
Tb427_030059900		103.786	69.4714	70.2822
Tb427_100101600		103.778	101.771	106.99
Tb427_100147700		103.746	112.223	111.748
Tb427_030013600		103.739	73.8222	71.3499
Tb427_040022400		103.681	123.976	95.8819
Tb427_080073500		103.573	95.9947	85.1246
Tb427_070037800		103.549	94.702	99.6496
Tb427_030014400		103.528	80.7798	60.0428
Tb427_010026000		103.489	109.373	111.605
Tb427_090015500		103.477	91.4756	97.4568
Tb427_110048800		103.465	108.424	108.022
Tb427_050038500		103.448	74.7106	77.4689
Tb427_060009100		103.424	102.428	102.606
Tb427_030015800		103.315	74.2944	68.3603
Tb427_110162200		103.277	121.869	122.341
Tb427_080042800		103.27	124.784	129.46
Tb427_050007700		103.226	68.9745	55.1214
Tb427_100171000		103.111	86.4849	89.1786
Tb427_080055600		103.097	97.3159	93.0813
Tb427_040036800		102.932	107.666	92.1725
Tb427_090064100		102.928	103.195	102.954
Tb427_050046200		102.855	82.5443	75.1426
Tb427_040042200		102.827	104.889	110.337
Tb427_090068100		102.742	114.446	103.457
Tb427_040016500		102.677	114.485	119.083
Tb427_040041300		102.614	102.772	101.098
Tb427_090024500		102.581	118.836	108.822
Tb427_090058600		102.572	109.978	87.3284
Tb427_100140700		102.5	112.843	121.622
Tb427_100053000		102.468	102.211	106.606
Tb427_080064500		102.461	99.5771	87.3591
Tb427_060048500		102.427	104.71	109.244
Tb427_040019200		102.404	117.602	112.812
Tb427_110058800		102.394	104.269	98.7188
Tb427_070021000:pseudogene		102.3	111.008	111.663
Tb427_060034500		102.25	107.448	88.0186
Tb427_100148600		102.201	115.942	100.831
Tb427_110123500		102.107	97.8083	73.847
Tb427_100110400		102.065	96.2602	97.2791
Tb427_100161400		102.042	112.151	104.706
Tb427_100123500		101.941	107.627	99.8056
Tb427_100017000		101.917	107.084	105.071
Tb427_110189600		101.905	96.9203	90.4851
Tb427_090009000		101.875	100.426	102.704
Tb427_050034400		101.867	64.5376	67.9524
Tb427_030008400		101.835	68.9187	79.9139
Tb427_100047400		101.833	120.265	121.112
Tb427_030033400		101.832	74.8754	63.1312
Tb427_030049600		101.812	61.7041	63.4018
Tb427_110179100		101.704	92.6255	90.9234
Tb427_050016100		101.684	68.6836	66.7667
Tb427_070060600		101.669	107.508	100.405
Tb427_100052400		101.644	126.665	128.528
Tb427_100076300		101.63	100.095	100.793
Tb427_040051500		101.559	100.082	103.418
Tb427_050012000		101.506	62.1268	64.5341
Tb427_040024100		101.242	105.632	97.8996
Tb427_110021900		101.23	102.58	83.9896
Tb427_000730000		101.154	88.5769	117.819
Tb427_040037600		101.142	114.051	82.7387
Tb427_100059500		101.11	109.857	105.47
Tb427_040014700:pseudogene		101.086	110.019	97.7779
Tb427_060041700		101.07	112.596	105.414
Tb427_050050300		101.065	63.1658	59.9099
Tb427_090018700		100.982	102.087	102.984
Tb427_050045600		100.94	60.9059	57.5511
Tb427_100084000		100.937	99.6401	96.8686
Tb427_100055300		100.934	119.395	128.424
Tb427_100029000		100.874	106.162	95.9979
Tb427_090031300		100.863	98.7868	97.5784
Tb427_030045400		100.828	71.8401	72.3736
Tb427_050027300		100.77	69.1073	63.9017
Tb427_100140800		100.682	107.303	98.3322
Tb427_010022200		100.626	99.0175	92.02
Tb427_030041100		100.623	60.1864	58.1307
Tb427_100142800		100.606	99.4012	95.7014
Tb427_090018900		100.582	99.4488	90.3476
Tb427_050038800		100.571	64.6497	63.8774
Tb427_110099500		100.556	106.895	104.091
Tb427_050016200		100.553	67.7904	66.868
Tb427_080082200		100.449	88.208	90.6122
Tb427_040040200		100.434	97.0642	89.0418
Tb427_000668200		100.336	112.513	107.536
Tb427_110081400		100.328	77.8773	102.274
Tb427_030044500		100.328	66.7825	66.7268
Tb427_000655000		100.304	111.77	91.0927
Tb427_080007400		100.282	108.877	98.7273
Tb427_100114000		100.259	98.6708	93.1303
Tb427_000720500:pseudogene		100.244	92.0914	87.9512
Tb427_000772700		100.234	88.1937	99.2328
Tb427_030055500		100.182	61.4307	69.9448
Tb427_110120900		100.18	95.1612	86.1983
Tb427_110161100		100.072	111.509	124.216
Tb427_050050200:pseudogene		100.038	63.0572	65.4377
Tb427_050007200		100.034	60.417	46.589
Tb427_040048500		99.9954	101.985	159.716
Tb427_110151800		99.9602	90.2438	91.5786
Tb427_110170600		99.9132	113.084	101.259
Tb427_100035500		99.8441	107.846	103.01
Tb427_070038800		99.8297	103.118	99.8696
Tb427_100031300		99.8101	96.8504	80.6002
Tb427_090039000		99.7752	112.113	104.168
Tb427_100072900		99.77	99.5398	91.9948
Tb427_110043300		99.7389	98.056	74.3096
Tb427_050041600		99.7211	69.3122	59.7043
Tb427_080011700		99.6796	95.3152	84.4829
Tb427_070030000		99.6775	108.828	109.402
Tb427_110165200		99.6702	93.0198	81.1792
Tb427_090078000		99.6206	93.2443	97.6575
Tb427_000007100		99.6129	6.33015	9.12199
Tb427_100071900:pseudogene		99.5993	106.601	98.7854
Tb427_110089200		99.5863	105.278	111.378
Tb427_110008200		99.495	111.585	98.6823
Tb427_110075900		99.4839	108.376	108.99
Tb427_100045000		99.4582	104.493	109.134
Tb427_080087900		99.3824	91.9212	87.9955
Tb427_110091500		99.3694	126.074	126.118
Tb427_050036400		99.362	68.0643	67.5142
Tb427_070032600		99.3125	93.9364	82.7415
Tb427_110043600		99.2866	104.319	89.4825
Tb427_110007700		99.2863	95.211	95.745
Tb427_100077100		99.2342	103.472	103.011
Tb427_010022800		99.1698	109.276	95.0115
Tb427_000655100		99.1542	90.5299	84.9297
Tb427_030012500		99.1024	75.8676	82.7538
Tb427_030021600		99.0855	68.1197	64.7601
Tb427_020021600		99.0482	102.152	90.7551
Tb427_110120700		99.0221	118.036	103.959
Tb427_000664900		98.9535	87.7907	92.6021
Tb427_070013000		98.9414	110.896	94.2463
Tb427_110149800		98.9237	111.88	106.535
Tb427_110187900		98.9229	101.123	107.4
Tb427_080039000		98.8695	112.141	105.704
Tb427_040038400		98.8519	115.437	104.222
Tb427_000621900		98.8515	99.1256	107.546
Tb427_030022300		98.8433	82.5366	78.0175
Tb427_070072200		98.8405	94.6797	90.0907
Tb427_100168100		98.8155	86.8949	89.9364
Tb427_110185900		98.7951	92.8329	79.9016
Tb427_110139100		98.7689	88.1791	90.0366
Tb427_030058100		98.7456	62.0305	61.3089
Tb427_100060900		98.7232	95.1567	96.271
Tb427_110078600		98.714	130.408	136.95
Tb427_080010000		98.7	115.707	118.178
Tb427_080027700		98.6661	104.636	100.575
Tb427_110068900		98.6306	107.968	105.045
Tb427_080017300		98.5606	92.081	94.6317
Tb427_080050400		98.5552	88.7954	84.6483
Tb427_070068300		98.4659	97.0373	99.7739
Tb427_000483800		98.4417	27.7928	26.8594
Tb427_060018900		98.4249	90.5506	113.479
Tb427_050018200		98.3677	69.8667	70.971
Tb427_040018100		98.3644	96.5359	99.1795
Tb427_050036900		98.3473	60.4611	71.6839
Tb427_110134300		98.303	90.9002	77.2744
Tb427_030057100		98.3027	70.5371	67.2529
Tb427_000771700		98.2453	89.0286	100.113
Tb427_110138200		98.2182	83.1528	76.9302
Tb427_070056200		98.1877	85.9105	94.1611
Tb427_030035600		98.17	89.0142	89.7624
Tb427_110061600		98.1413	84.9346	82.2026
Tb427_080028900		98.1091	108.129	108.008
Tb427_060015300		98.1014	97.2548	91.9178
Tb427_110022100		98.0722	95.4651	90.9608
Tb427_060055600		98.0371	100.26	100.157
Tb427_030034100		97.9875	65.4897	60.0211
Tb427_110054300		97.9875	103.455	104.038
Tb427_110183500		97.9875	91.2042	88.5643
Tb427_090050800		97.9726	94.9934	86.9061
Tb427_090045600		97.9525	113.267	101.394
Tb427_070015500		97.9404	95.7194	101.741
Tb427_000775700		97.7658	111.387	107.858
Tb427_090055000		97.6846	89.5542	96.4209
Tb427_040041800		97.6806	96.1175	104.742
Tb427_030014300		97.6703	69.4012	62.6028
Tb427_100093800:pseudogene		97.6106	90.9642	96.3554
Tb427_050021400		97.5876	61.7806	61.378
Tb427_080060300		97.5345	102.605	101.67
Tb427_080064100		97.5051	71.0241	81.3079
Tb427_080088000		97.498	97.7422	91.7773
Tb427_090024900		97.4404	100.892	99.8054
Tb427_040036500		97.4333	105.428	99.5027
Tb427_100163400		97.4206	93.7722	86.2441
Tb427_050052500		97.3953	64.7259	70.3895
Tb427_050051500		97.3163	74.4199	73.0668
Tb427_040025000		97.3079	102.162	110.785
Tb427_090035100		97.3034	104.602	92.051
Tb427_060024800		97.2654	110.983	88.2651
Tb427_110086000		97.2337	88.9691	85.4281
Tb427_110057400		97.205	99.3097	94.8437
Tb427_100090800		97.0421	90.2849	93.6429
Tb427_110031500		97.0302	88.7585	84.6318
Tb427_090006300		96.9739	119.492	128.09
Tb427_110166700		96.9612	92.3829	97.5941
Tb427_070070400		96.8919	82.134	86.591
Tb427_110126200		96.8367	112.952	114.668
Tb427_080025300		96.7966	106.64	106.575
Tb427_080011000		96.7057	84.7044	83.8764
Tb427_080048900		96.6862	94.1533	94.1461
Tb427_050009700		96.6822	59.5872	53.6835
Tb427_030006600		96.5588	64.7474	66.4431
Tb427_110172100		96.5314	94.9953	98.0611
Tb427_110184100		96.525	90.6759	82.6842
Tb427_110185000		96.5028	106.696	101.37
Tb427_090073000		96.5012	80.3192	76.9756
Tb427_050027200		96.4938	75.6035	75.8091
Tb427_080085700		96.3426	89.2086	85.8562
Tb427_010025900		96.3373	108.325	123.871
Tb427_100086300		96.3205	100.182	96.6331
Tb427_050042000		96.2228	63.7865	66.3027
Tb427_030012900		96.1327	64.756	68.0695
Tb427_100131500		96.1278	98.1006	95.1376
Tb427_080022700		96.1268	97.6338	90.2654
Tb427_030048600		96.0833	68.0242	72.332
Tb427_030051900		96.0609	65.0045	72.3487
Tb427_110137800		96.06	90.0317	140.936
Tb427_080029700		96.0392	97.0215	90.9163
Tb427_110009300		96.0389	87.2018	82.3834
Tb427_110103500		96.037	101.689	100.087
Tb427_110090300		95.9828	107.443	101.398
Tb427_110029100		95.972	98.1727	97.084
Tb427_090014500		95.9582	100.417	93.8605
Tb427_080050900		95.9352	88.2219	80.9564
Tb427_030007300		95.8466	61.0787	65.0814
Tb427_060045600		95.8381	91.1292	82.6482
Tb427_030031200		95.7327	70.6802	76.0014
Tb427_020031800		95.7078	85.0067	89.1024
Tb427_030056500		95.6783	67.7373	64.4755
Tb427_080051300		95.6683	94.561	87.3889
Tb427_090038800		95.6492	113.957	97.9815
Tb427_030019700		95.6363	57.6687	62.7973
Tb427_100127700		95.6301	93.0306	85.9499
Tb427_100162300		95.6014	98.9939	98.1198
Tb427_030029300		95.5939	73.0477	74.0218
Tb427_080028800		95.5233	97.8276	84.7503
Tb427_050036800		95.462	61.6596	60.3645
Tb427_100083800		95.4179	90.3315	81.5965
Tb427_110190100		95.4061	87.2917	113.395
Tb427_100039800		95.3965	106.385	98.492
Tb427_090036700		95.3488	94.7978	97.406
Tb427_040009300		95.3441	89.0041	80.0742
Tb427_050029000		95.2324	64.6292	60.1987
Tb427_100028400		95.1864	92.0962	101.893
Tb427_110110800		95.1055	97.7491	91.4056
Tb427_090055100		95.1026	101.697	95.9291
Tb427_110094500		95.0958	100.621	85.732
Tb427_100105200		95.0929	104.309	82.9599
Tb427_050030400		95.0822	64.2227	60.3436
Tb427_100162400		95.0767	99.072	87.224
Tb427_030005200		95.0642	67.5177	48.6032
Tb427_100167900		95.0233	96.5977	96.0016
Tb427_030009800		95.01	65.7578	67.9826
Tb427_050039300		94.9192	59.3619	60.1222
Tb427_090090000		94.9095	110.503	97.4564
Tb427_110059100		94.8288	102.383	100.619
Tb427_030010200		94.813	64.0276	62.3642
Tb427_060032300		94.784	99.9946	88.75
Tb427_080028600		94.7767	282.043	323.052
Tb427_070047600		94.7435	86.6872	83.8413
Tb427_100007900		94.7256	94.6924	91.4654
Tb427_050039600		94.7135	63.4756	59.6956
Tb427_080043600		94.7037	136.266	147.15
Tb427_100157900		94.6375	96.7355	95.5146
[truncated: 15,244 more rows]

## Sheet: Counts
		Read count				Reads/kbp				TPM
Geneid	Length	118	221	BES7		118	221	BES7		118	221	BES7
Tb427_000005000	1899	3495	436	438		1840.44	229.595	230.648		62.4255	7.43921	7.37165
Tb427_000005100	570	0	2	0		0	3.50877	0		0	0.113689	0
Tb427_000005200:pseudogene	726	14	9	6		19.2837	12.3967	8.26446		0.65408	0.401672	0.264138
Tb427_000005300:pseudogene	531	4	7	6		7.53296	13.1827	11.2994		0.255508	0.427138	0.361137
Tb427_000005400:pseudogene	312	1	6	1		3.20513	19.2308	3.20513		0.108714	0.623106	0.102438
Tb427_000005500:pseudogene	1158	1515	289	1125		1308.29	249.568	971.503		44.3756	8.08639	31.0498
Tb427_000005600	1200	1805	147	426		1504.17	122.5	355		51.0194	3.96918	11.346
Tb427_000005700	1440	176	40	55		122.222	27.7778	38.1944		4.14562	0.900042	1.22072
Tb427_000005800:pseudogene	471	83	390	11		176.221	828.025	23.3546		5.97719	26.8293	0.746427
Tb427_000005900	1614	378	718	453		234.201	444.857	280.669		7.9438	14.4141	8.97037
Tb427_000006000:pseudogene	1158	178	141	357		153.713	121.762	308.29		5.21376	3.94526	9.85315
Tb427_000006100	1206	138	106	1102		114.428	87.8939	913.765		3.88125	2.84789	29.2045
Tb427_000006200:pseudogene	1440	6	8	15		4.16667	5.55556	10.4167		0.141328	0.180008	0.332923
Tb427_000006300:pseudogene	357	11	4	3		30.8123	11.2045	8.40336		1.04512	0.363042	0.268577
Tb427_000006400	3807	104	610	102		27.3181	160.231	26.7928		0.926596	5.19173	0.856314
Tb427_000006500	1893	125	298	222		66.0328	157.422	117.274		2.23975	5.10071	3.74816
Tb427_000006600:pseudogene	1017	6	581	2		5.89971	571.288	1.96657		0.200111	18.5106	0.0628528
Tb427_000006700	3807	99	1074	135		26.0047	282.112	35.461		0.882048	9.14085	1.13336
Tb427_000006800:pseudogene	999	1	0	0		1.001	0	0		0.0339527	0	0
Tb427_000006900	888	15	2	9		16.8919	2.25225	10.1351		0.572952	0.0729764	0.323925
Tb427_000007000:pseudogene	1359	27	7	10		19.8675	5.15085	7.35835		0.673882	0.166895	0.235178
Tb427_000007100	1899	5577	371	542		2936.81	195.366	285.413		99.6129	6.33015	9.12199
Tb427_000007200:pseudogene	729	7	16	10		9.60219	21.9479	13.7174		0.325694	0.711144	0.438418
Tb427_000007300:pseudogene	492	5	10	13		10.1626	20.3252	26.4228		0.344703	0.658567	0.844489
Tb427_000007400	1203	377	615	1109		313.383	511.222	921.862		10.6296	16.5644	29.4633
Tb427_000007500:pseudogene	1158	535	424	1474		462.003	366.149	1272.88		15.6706	11.8638	40.6822
Tb427_000007600	1443	259	80	698		179.487	55.4401	483.714		6.08798	1.79634	15.4598
Tb427_000007700	549	490	33	31		892.532	60.1093	56.4663		30.2736	1.94763	1.8047
Tb427_000007800	1365	48	206	187		35.1648	150.916	136.996		1.19275	4.8899	4.37849
Tb427_000007900	993	25	24	32		25.1762	24.1692	32.2256		0.853946	0.783118	1.02995
Tb427_000008000:pseudogene	1374	3097	1190	745		2254	866.084	542.213		76.4529	28.0624	17.3295
Tb427_000008100:pseudogene	309	3	0	0		9.70874	0	0		0.329308	0	0
Tb427_000008200	1899	7197	331	492		3789.89	174.302	259.084		128.548	5.64766	8.28048
Tb427_000008300:pseudogene	729	3	7	5		4.11523	9.60219	6.85871		0.139583	0.311126	0.219209
Tb427_000008400:pseudogene	489	3	1	4		6.13497	2.04499	8.17996		0.20809	0.0662607	0.261437
Tb427_000008500	1200	263	252	886		219.167	210	738.333		7.43386	6.80432	23.5976
Tb427_000008600:pseudogene	1161	250	215	589		215.332	185.185	507.321		7.30378	6.00028	16.2143
Tb427_000008700	1443	72	46	235		49.896	31.878	162.855		1.69241	1.0329	5.20496
Tb427_000008800:pseudogene	357	31	1088	9		86.8347	3047.62	25.2101		2.94533	98.7474	0.80573
Tb427_000008900	3807	129	16547	1166		33.8849	4346.47	306.278		1.14933	140.832	9.78884
Tb427_000009000	1893	79	3534	342		41.7327	1866.88	180.666		1.41552	60.4897	5.77419
Tb427_000009100	1893	67	1714	454		35.3936	905.441	239.831		1.2005	29.3377	7.66515
Tb427_000009200	876	40	205	14		45.6621	234.018	15.9817		1.5488	7.58254	0.510787
Tb427_000009300	1413	171	6118	5113		121.019	4329.79	3618.54		4.10482	140.292	115.651
Tb427_000009400	987	11	390	1579		11.1449	395.137	1599.8		0.37802	12.803	51.1306
Tb427_000009500:pseudogene	1353	287	68	68		212.121	50.2587	50.2587		7.19489	1.62846	1.6063
Tb427_000009600:pseudogene	1161	343	704	2235		295.435	606.374	1925.06		10.0208	19.6474	61.5263
Tb427_000009700	1203	181	722	906		150.457	600.166	753.117		5.10332	19.4463	24.0701
Tb427_000009800	1440	49	53	55		34.0278	36.8056	38.1944		1.15418	1.19256	1.22072
Tb427_000009900	639	9	98	11		14.0845	153.365	17.2144		0.477729	4.96924	0.550183
Tb427_000010000	3807	344	972	4024		90.3599	255.319	1057		3.06489	8.27272	33.7824
Tb427_000010100	2031	605	252	56		297.883	124.077	27.5726		10.1038	4.02028	0.881239
Tb427_000010200	2031	427	213	36		210.241	104.874	17.7253		7.13112	3.39809	0.566511
Tb427_000010300:pseudogene	999	6	61	8		6.00601	61.0611	8.00801		0.203716	1.97847	0.255941
Tb427_000010400	1419	5	23	15		3.52361	16.2086	10.5708		0.119516	0.525183	0.33785
Tb427_000010500:pseudogene	1107	54	38	31		48.7805	34.327	28.0036		1.65457	1.11225	0.895013
Tb427_000010600:pseudogene	978	2	8	2		2.04499	8.17996	2.04499		0.0693635	0.265043	0.0653592
Tb427_000010700	1065	0	0	0		0	0	0		0	0	0
Tb427_000010800	1899	6246	454	664		3289.1	239.073	349.658		111.562	7.74633	11.1753
Tb427_000010900:pseudogene	732	2	12	7		2.73224	16.3934	9.56284		0.0926742	0.531172	0.305635
Tb427_000011000:pseudogene	525	0	3	13		0	5.71429	24.7619		0	0.185151	0.791406
Tb427_000011100:pseudogene	1164	1641	3200	7199		1409.79	2749.14	6184.71		47.8184	89.0763	197.667
Tb427_000011200	1203	529	1516	5513		439.734	1260.18	4582.71		14.9152	40.8318	146.466
Tb427_000011300	1443	83	179	617		57.5191	124.047	427.581		1.95097	4.01931	13.6658
Tb427_000011400:pseudogene	357	21	83	54		58.8235	232.493	151.261		1.99522	7.53312	4.83438
Tb427_000011500	3807	129	1146	498		33.8849	301.024	130.812		1.14933	9.75364	4.18082
Tb427_000011600	1893	474	806	590		250.396	425.779	311.675		8.49312	13.7959	9.96132
Tb427_000011700	2031	118	1849	216		58.0995	910.389	106.352		1.97066	29.498	3.39906
Tb427_000011800	1107	69	99	2010		62.3306	89.4309	1815.72		2.11418	2.8977	58.0315
Tb427_000011900	1365	250	77	127		183.15	56.4103	93.0403		6.21222	1.82778	2.97363
Tb427_000012000	747	156	68	63		208.835	91.0308	84.3373		7.08343	2.94953	2.69548
Tb427_000012100:pseudogene	981	71	4	4		72.3751	4.07747	4.07747		2.45487	0.132116	0.130319
Tb427_000012200:pseudogene	1500	0	2	0		0	1.33333	0		0	0.043202	0
Tb427_000012300:pseudogene	888	6	0	2		6.75676	0	2.25225		0.229181	0	0.0719834
Tb427_000012400:pseudogene	1485	290	150	101		195.286	101.01	68.0135		6.62386	3.27288	2.17375
Tb427_000012500	1899	10487	341	477		5522.38	179.568	251.185		187.312	5.81828	8.02803
Tb427_000012600	318	416	2	5		1308.18	6.28931	15.7233		44.3717	0.203783	0.502526
Tb427_000012700:pseudogene	729	6	4	0		8.23045	5.48697	0		0.279167	0.177786	0
Tb427_000012800:pseudogene	531	0	3	5		0	5.64972	9.4162		0	0.183059	0.300948
Tb427_000012900	795	0	0	78685		0	0	98974.8		0	0	3163.3
Tb427_000013000:pseudogene	1158	1089	553	2172		940.415	477.547	1875.65		31.8977	15.4733	59.9469
Tb427_000013100	1200	2752	322	968		2293.33	268.333	806.667		77.787	8.6944	25.7816
Tb427_000013200	1443	197	39	107		136.521	27.027	74.1511		4.63063	0.875716	2.36992
Tb427_000013300:pseudogene	357	28	16	18		78.4314	44.8179	50.4202		2.66029	1.45217	1.61146
Tb427_000013400:pseudogene	3519	169	394	680		48.025	111.964	193.237		1.62895	3.62779	6.17597
Tb427_000013500	1893	450	203	64		237.718	107.237	33.8088		8.06309	3.47465	1.08055
Tb427_000013600:pseudogene	1002	136	5	4		135.729	4.99002	3.99202		4.60374	0.161684	0.127587
Tb427_000013700	1389	147	28	13		105.832	20.1584	9.35925		3.58967	0.653162	0.299128
Tb427_000013800	687	26	0	0		37.8457	0	0		1.28368	0	0
Tb427_000013900	978	61	3	0		62.3722	3.06748	0		2.11559	0.0993911	0
Tb427_000014000	1500	212	40	46		141.333	26.6667	30.6667		4.79385	0.86404	0.980126
Tb427_000014100	249	0	0	0		0	0	0		0	0	0
Tb427_000014200	600	0	0	1785		0	0	2975		0	0	95.0829
Tb427_000014300:pseudogene	1161	151	31988	536		130.06	27552.1	461.671		4.41148	892.73	14.7553
Tb427_000014400	1203	122	21068	285		101.413	17512.9	236.908		3.43981	567.444	7.57172
Tb427_000014500:pseudogene	1434	302	26896	161		210.6	18755.9	112.273		7.14328	607.72	3.58833
Tb427_000014600:pseudogene	936	54	15404	38		57.6923	16457.3	40.5983		1.95685	533.24	1.29755
Tb427_000014700	3807	203	24408	2437		53.3228	6411.35	640.137		1.80864	207.737	20.4592
Tb427_000014800	738	855	20814	5670		1158.54	28203.3	7682.93		39.2961	913.828	245.551
Tb427_000014900:pseudogene	771	89	2329	2711		115.435	3020.75	3516.21		3.91539	97.8769	112.38
Tb427_000015000:pseudogene	756	186	1979	2186		246.032	2617.72	2891.53		8.34509	84.8182	92.4153
Tb427_000015100	1893	51	7071	143		26.9414	3735.34	75.5415		0.913817	121.031	2.41435
Tb427_000015200:pseudogene	984	53	20480	16		53.8618	20813	16.2602		1.82692	674.373	0.519685
Tb427_000015300	3807	130	11419	2144		34.1476	2999.47	563.173		1.15824	97.1875	17.9994
Tb427_000015400	1893	69	6140	336		36.4501	3243.53	177.496		1.23634	105.095	5.67289
Tb427_000015500	2031	89	5576	317		43.8208	2745.45	156.081		1.48635	88.9566	4.98844
Tb427_000015600:pseudogene	996	19	14790	10		19.0763	14849.4	10.0402		0.647044	481.143	0.32089
Tb427_000015700	1413	136	6343	5516		96.2491	4489.03	3903.75		3.26465	145.451	124.766
Tb427_000015800	990	16	14216	1300		16.1616	14359.6	1313.13		0.548182	465.273	41.9685
Tb427_000015900:pseudogene	1416	0	617	0		0	435.734	0		0	14.1185	0
Tb427_000016000	1431	210	3160346	392		146.751	2.20849e+06	273.934		4.97759	71558.3	8.75512
Tb427_000016100:pseudogene	312	2	0	0		6.41026	0	0		0.217428	0	0
Tb427_000016200:pseudogene	1161	105	5342	152		90.4393	4601.21	130.922		3.06759	149.086	4.18434
Tb427_000016300:pseudogene	1161	135	4659	172		116.279	4012.92	148.148		3.94404	130.025	4.73491
Tb427_000016400	1203	98	7010	122		81.463	5827.1	101.413		2.76312	188.807	3.24123
Tb427_000016500	1434	375	10759	139		261.506	7502.79	96.9317		8.86996	243.102	3.098
Tb427_000016600:pseudogene	933	25	530	10		26.7953	568.06	10.7181		0.908862	18.406	0.342558
Tb427_000016700	3807	48	3241	1075		12.6084	851.327	282.375		0.427659	27.5843	9.02487
Tb427_000016800	738	200	5087	4326		271.003	6892.95	5861.79		9.19207	223.342	187.347
Tb427_000016900:pseudogene	774	130	210	171		167.959	271.318	220.93		5.69695	8.79111	7.06107
Tb427_000017000:pseudogene	756	186	431	430		246.032	570.106	568.783		8.34509	18.4723	18.1787
Tb427_000017100	1893	72	716	1342		38.0349	378.236	708.928		1.29009	12.2554	22.6578
Tb427_000017200	1107	66	203	2827		59.6206	183.379	2553.75		2.02226	5.94174	81.6195
Tb427_000017300	1425	26	1294	950		18.2456	908.07	666.667		0.618868	29.4228	21.3071
Tb427_000017400	987	12	137	892		12.1581	138.804	903.749		0.412386	4.49747	28.8844
Tb427_000017500:pseudogene	873	99	107	86		113.402	122.566	98.5109		3.84646	3.97132	3.14847
Tb427_000017600	930	110	105	103		118.28	112.903	110.753		4.01189	3.65823	3.53973
Tb427_000017700	330	906	1079	1099		2745.45	3269.7	3330.3		93.1224	105.943	106.439
Tb427_000017800:pseudogene	873	94	100	95		107.675	114.548	108.82		3.65219	3.71151	3.47796
Tb427_000017900	930	134	95	97		144.086	102.151	104.301		4.88722	3.30983	3.33353
Tb427_000018000	330	651	737	583		1972.73	2233.33	1766.67		66.9124	72.3634	56.4638
Tb427_000018100	1326	4	9	2		3.01659	6.78733	1.5083		0.102319	0.21992	0.0482061
Tb427_000018200	1194	9	11	8		7.53769	9.21273	6.70017		0.255669	0.298506	0.214142
Tb427_000018300	924	1	1	0		1.08225	1.08225	0		0.0367086	0.0350666	0
Tb427_000018400	1584	453	838	14		285.985	529.04	8.83838		9.70025	17.1417	0.28248
Tb427_000018500:pseudogene	327	560	4	0		1712.54	12.2324	0		58.0871	0.396349	0
Tb427_000018600	1899	25020	391	412		13175.4	205.898	216.956		446.892	6.6714	6.93406
Tb427_000018700	318	1460	19	17		4591.19	59.7484	53.4591		155.728	1.93594	1.70859
Tb427_000018800:pseudogene	726	2978	23	6		4101.93	31.6804	8.26446		139.132	1.02649	0.264138
Tb427_000018900:pseudogene	516	2586	19	16		5011.63	36.8217	31.0078		169.988	1.19308	0.991028
Tb427_000019000:pseudogene	327	597	0	0		1825.69	0	0		61.925	0	0
Tb427_000019100:pseudogene	1158	30641	623	1407		26460.3	537.997	1215.03		897.499	17.4319	38.833
Tb427_000019200	1200	14853	343	516		12377.5	285.833	430		419.829	9.26143	13.7431
Tb427_000019300	516	3617	37	67		7009.69	71.7054	129.845		237.76	2.32336	4.14993
Tb427_000019400	1437	20489	198	440		14258.2	137.787	306.193		483.619	4.46451	9.78614
Tb427_000019500:pseudogene	507	8482	38	19		16729.8	74.9507	37.4753		567.453	2.42852	1.19774
Tb427_000019600:pseudogene	3519	33798	95	164		9604.43	26.9963	46.6041		325.77	0.874721	1.4895
Tb427_000019700	1893	5808	140	46		3068.15	73.9567	24.3001		104.068	2.39631	0.776645
Tb427_000019800:pseudogene	999	24046	79	7		24070.1	79.0791	7.00701		816.427	2.56228	0.223948
Tb427_000019900	1383	19093	213	164		13805.5	154.013	118.583		468.265	4.99025	3.78998
Tb427_000020000	687	9557	10	5		13911.2	14.556	7.27802		471.851	0.471638	0.23261
Tb427_000020100	978	9828	6	0		10049.1	6.13497	0		340.852	0.198782	0
Tb427_000020200:pseudogene	1527	0	195	82		0	127.701	53.7001		0	4.13772	1.71629
Tb427_000020300:pseudogene	324	0	0	0		0	0	0		0	0	0
Tb427_000020400:pseudogene	1164	210	2604	215		180.412	2237.11	184.708		6.11936	72.4858	5.90338
Tb427_000020500:pseudogene	1164	209	2520	206		179.553	2164.95	176.976		6.09022	70.1476	5.65626
Tb427_000020600	1206	179	4717	167		148.425	3911.28	138.474		5.03437	126.731	4.42573
Tb427_000020700	1434	489	5194	179		341.004	3622.04	124.826		11.5664	117.359	3.98951
Tb427_000020800:pseudogene	951	36	273	11		37.8549	287.066	11.5668		1.28399	9.30138	0.369681
Tb427_000020900	3807	45	447	636		11.8203	117.415	167.061		0.400931	3.80443	5.33937
Tb427_000021000	738	463	9468	6137		627.371	12829.3	8315.72		21.2796	415.688	265.776
Tb427_000021100:pseudogene	768	70	130	132		91.1458	169.271	171.875		3.09155	5.48463	5.49324
Tb427_000021200:pseudogene	756	69	660	740		91.2698	873.016	978.836		3.09576	28.287	31.2842
Tb427_000021300	1893	17	463	293		8.98045	244.585	154.781		0.304606	7.92493	4.94689
Tb427_000021400	1002	5	22	18		4.99002	21.9561	17.9641		0.169255	0.71141	0.574143
Tb427_000021500	1470	20	109	139		13.6054	74.1497	94.5578		0.46148	2.40256	3.02213
Tb427_000021600	699	9	0	1		12.8755	0	1.43062		0.436722	0	0.0457234
Tb427_000021700	987	2	24	3		2.02634	24.3161	3.03951		0.068731	0.787879	0.0971448
Tb427_000021800:pseudogene	1488	2	2	2		1.34409	1.34409	1.34409		0.0455897	0.0435504	0.0429579
Tb427_000021900	1431	86	40	24		60.0978	27.9525	16.7715		2.03844	0.905702	0.536028
Tb427_000022000:pseudogene	906	23	11	9		25.3863	12.1413	9.93377		0.861072	0.393396	0.31749
Tb427_000022100	1371	103	57	34		75.1276	41.5755	24.7994		2.54824	1.34711	0.792605
Tb427_000022200:pseudogene	1848	172	79	44		93.0736	42.7489	23.8095		3.15694	1.38513	0.760968
Tb427_000022300:pseudogene	312	0	1	0		0	3.20513	0		0	0.103851	0
Tb427_000022400:pseudogene	1161	259	1793	237		223.084	1544.36	204.134		7.56671	50.0395	6.52427
Tb427_000022500	1203	381	5201	308		316.708	4323.36	256.027		10.7423	140.083	8.18277
Tb427_000022600	1437	1018	8230	192		708.42	5727.21	133.612		24.0287	185.57	4.27032
Tb427_000022700:pseudogene	933	160	961	19		171.49	1030.01	20.3644		5.81672	33.3739	0.65086
Tb427_000022800	3807	398	11843	3656		104.544	3110.85	960.336		3.54601	100.796	30.693
Tb427_000022900	738	329	9896	7843		445.799	13409.2	10627.4		15.121	434.479	339.658
Tb427_000023000:pseudogene	777	722	1248	1329		929.215	1606.18	1710.42		31.5178	52.0426	54.6663
Tb427_000023100:pseudogene	756	60	2364	2595		79.3651	3126.98	3432.54		2.69196	101.319	109.706
Tb427_000023200	1893	443	690	1330		234.02	364.501	702.588		7.93767	11.8104	22.4552
Tb427_000023300:pseudogene	996	95	25	840		95.3815	25.1004	843.373		3.23522	0.813291	26.9548
Tb427_000023400	1404	139	4937	4476		99.0028	3516.38	3188.03		3.35805	113.936	101.892
Tb427_000023500	987	34	1152	3160		34.4478	1167.17	3201.62		1.16843	37.8182	102.326
Tb427_000023600	1581	347	54	55		219.481	34.1556	34.7881		7.44453	1.10669	1.11185
Tb427_000023700:pseudogene	312	1	1	0		3.20513	3.20513	0		0.108714	0.103851	0
Tb427_000023800	1899	4649	247	291		2448.13	130.068	153.239		83.0375	4.21441	4.8976
Tb427_000023900:pseudogene	732	2	3	0		2.73224	4.09836	0		0.0926742	0.132793	0
Tb427_000024000:pseudogene	492	2	16	8		4.06504	32.5203	16.2602		0.137881	1.05371	0.519685
Tb427_000024100:pseudogene	312	3	0	2		9.61538	0	6.41026		0.326142	0	0.204876
Tb427_000024200	1197	175	206	77739		146.199	172.097	64944.9		4.95888	5.5762	2075.68
Tb427_000024300	1206	204	162	42591		169.154	134.328	35315.9		5.7375	4.35244	1128.72
Tb427_000024400	1206	145	225	59167		120.232	186.567	49060.5		4.07812	6.04506	1568.01
Tb427_000024500	1440	324	29	19186		225	20.1389	13323.6		7.63172	0.65253	425.831
Tb427_000024600:pseudogene	507	18	9	9803		35.503	17.7515	19335.3		1.20422	0.575175	617.969
Tb427_000024700	3807	255	3152	31102		66.9819	827.949	8169.69		2.27194	26.8268	261.108
Tb427_000024800	738	333	9834	7747		451.22	13325.2	10497.3		15.3048	431.757	335.5
Tb427_000024900:pseudogene	771	84	2235	2648		108.949	2898.83	3434.5		3.69543	93.9265	109.769
Tb427_000025000:pseudogene	756	117	1457	1724		154.762	1927.25	2280.42		5.24933	62.4458	72.8838
Tb427_000025100	1893	64	912	2223		33.8088	481.775	1174.33		1.14675	15.6102	37.5322
Tb427_000025200	1107	40	19	14308		36.1337	17.1635	12925		1.22561	0.556123	413.092
Tb427_000025300	1413	143	6103	5616		101.203	4319.18	3974.52		3.43268	139.948	127.028
Tb427_000025400	987	18	1892	3719		18.2371	1916.92	3767.98		0.618579	62.1111	120.427
Tb427_000025500:pseudogene	846	0	0	14996		0	0	17725.8		0	0	566.527
Tb427_000025600	1530	239	31	3478265		156.209	20.2614	2.27338e+06		5.29842	0.656501	72658.6
Tb427_000025700	1824	7	0	3		3.83772	0	1.64474		0.130171	0	0.0525668
Tb427_000025800	720	0	2	0		0	2.77778	0		0	0.0900042	0
Tb427_000025900	675	3	0	0		4.44444	0	0		0.15075	0	0
Tb427_000026000:pseudogene	570	2	1	0		3.50877	1.75439	0		0.119013	0.0568447	0
Tb427_000026100	564	0	0	0		0	0	0		0	0	0
Tb427_000026200	297	0	0	2		0	0	6.73401		0	0	0.215223
Tb427_000026300:pseudogene	1296	0	0	0		0	0	0		0	0	0
Tb427_000026400:pseudogene	1476	0	2	0		0	1.35501	0		0	0.0439045	0
Tb427_000026500:pseudogene	837	0	0	0		0	0	0		0	0	0
Tb427_000026600	897	0	0	0		0	0	0		0	0	0
Tb427_000026700	1458	0	0	0		0	0	0		0	0	0
Tb427_000026800	588	0	0	0		0	0	0		0	0	0
Tb427_000026900:pseudogene	1134	0	0	0		0	0	0		0	0	0
Tb427_000027000:pseudogene	858	0	0	0		0	0	0		0	0	0
Tb427_000027100:pseudogene	1386	2	2	0		1.443	1.443	0		0.0489448	0.0467554	0
Tb427_000027200:pseudogene	1503	0	0	0		0	0	0		0	0	0
Tb427_000027300:pseudogene	2499	17	3	9		6.80272	1.20048	3.60144		0.23074	0.0388974	0.115104
Tb427_000027400:pseudogene	1002	0	0	0		0	0	0		0	0	0
Tb427_000027500	1434	0	0	0		0	0	0		0	0	0
Tb427_000027600:pseudogene	876	0	0	0		0	0	0		0	0	0
Tb427_000027700:pseudogene	675	0	0	1		0	0	1.48148		0	0	0.0473491
Tb427_000027800:pseudogene	615	11	14	6		17.8862	22.7642	9.7561		0.606677	0.737595	0.311811
Tb427_000027900	1443	0	0	2		0	0	1.386		0	0	0.0442975
Tb427_000028000:pseudogene	489	1	0	0		2.04499	0	0		0.0693635	0	0
Tb427_000028100:pseudogene	420	0	0	0		0	0	0		0	0	0
Tb427_000028200	1596	0	0	1		0	0	0.626566		0	0	0.0200255
Tb427_000028300:pseudogene	1008	0	0	0		0	0	0		0	0	0
Tb427_000028400:pseudogene	1272	0	2	0		0	1.57233	0		0	0.0509458	0
Tb427_000028500	714	0	0	0		0	0	0		0	0	0
Tb427_000028600:pseudogene	1311	0	0	0		0	0	0		0	0	0
Tb427_000028700:pseudogene	807	2	0	0		2.47831	0	0		0.0840613	0	0
Tb427_000028800	1455	32	58	39		21.9931	39.8625	26.8041		0.745979	1.29161	0.856677
Tb427_000028900:pseudogene	669	0	0	2		0	0	2.98954		0	0	0.0955475
Tb427_000029000:pseudogene	1422	0	0	0		0	0	0		0	0	0
Tb427_000029100:pseudogene	1362	0	0	0		0	0	0		0	0	0
Tb427_000029200:pseudogene	1347	0	0	0		0	0	0		0	0	0
Tb427_000029300:pseudogene	861	0	0	0		0	0	0		0	0	0
Tb427_000029400	843	0	0	0		0	0	0		0	0	0
Tb427_000029500	369	0	0	0		0	0	0		0	0	0
Tb427_000029600	1752	6	2	6		3.42466	1.14155	3.42466		0.11616	0.036988	0.109454
Tb427_000029700	609	0	0	0		0	0	0		0	0	0
Tb427_000029800:pseudogene	1317	0	0	0		0	0	0		0	0	0
Tb427_000029900:pseudogene	1116	0	0	0		0	0	0		0	0	0
Tb427_000030000:pseudogene	1470	0	0	2		0	0	1.36054		0	0	0.0434839
Tb427_000030100:pseudogene	804	0	0	0		0	0	0		0	0	0
Tb427_000030200:pseudogene	1158	0	0	0		0	0	0		0	0	0
Tb427_000030300:pseudogene	2496	8	10	8		3.20513	4.00641	3.20513		0.108714	0.129814	0.102438
Tb427_000030400:pseudogene	1473	0	0	0		0	0	0		0	0	0
Tb427_000030500:pseudogene	852	0	0	2		0	0	2.34742		0	0	0.075025
Tb427_000030600:pseudogene	1317	0	0	0		0	0	0		0	0	0
Tb427_000030700:pseudogene	669	0	0	0		0	0	0		0	0	0
Tb427_000030800:pseudogene	804	0	0	4		0	0	4.97512		0	0	0.159008
Tb427_000030900:pseudogene	894	0	0	0		0	0	0		0	0	0
Tb427_000031000:pseudogene	2706	7	9	12		2.58684	3.32594	4.43459		0.0877425	0.107766	0.141732
Tb427_000031100	1389	0	0	0		0	0	0		0	0	0
Tb427_000031200	1422	0	0	0		0	0	0		0	0	0
Tb427_000031300:pseudogene	1362	0	0	0		0	0	0		0	0	0
Tb427_000031400:pseudogene	1329	2	2	3		1.50489	1.50489	2.25734		0.051044	0.0487607	0.0721459
Tb427_000031500:pseudogene	492	0	0	0		0	0	0		0	0	0
Tb427_000031600:pseudogene	1404	0	0	0		0	0	0		0	0	0
Tb427_000031700	900	0	0	0		0	0	0		0	0	0
Tb427_000031800:pseudogene	1389	2	0	0		1.43988	0	0		0.0488391	0	0
Tb427_000031900	924	0	0	0		0	0	0		0	0	0
Tb427_000032000:pseudogene	819	0	0	0		0	0	0		0	0	0
Tb427_000032100:pseudogene	1485	0	0	0		0	0	0		0	0	0
Tb427_000032200:pseudogene	567	0	0	0		0	0	0		0	0	0
Tb427_000032300	657	0	0	0		0	0	0		0	0	0
Tb427_000032400	1536	0	0	0		0	0	0		0	0	0
Tb427_000032500:pseudogene	2490	7	15	8		2.81124	6.0241	3.21285		0.0953539	0.19519	0.102685
Tb427_000032600	1152	0	0	0		0	0	0		0	0	0
Tb427_000032700:pseudogene	1425	0	0	0		0	0	0		0	0	0
Tb427_000032800:pseudogene	915	0	0	0		0	0	0		0	0	0
Tb427_000032900	426	0	0	0		0	0	0		0	0	0
Tb427_000033000:pseudogene	1410	0	0	0		0	0	0		0	0	0
Tb427_000033100:pseudogene	1512	0	0	0		0	0	0		0	0	0
Tb427_000033200:pseudogene	1536	0	0	0		0	0	0		0	0	0
Tb427_000033300:pseudogene	1065	0	0	0		0	0	0		0	0	0
Tb427_000033400:pseudogene	885	0	0	0		0	0	0		0	0	0
Tb427_000033500:pseudogene	1140	0	0	0		0	0	0		0	0	0
Tb427_000033600:pseudogene	3057	2	0	6		0.654236	0	1.96271		0.0221909	0	0.0627294
Tb427_000033700	1281	0	0	0		0	0	0		0	0	0
Tb427_000033800	1026	0	0	0		0	0	0		0	0	0
Tb427_000033900	915	0	0	2		0	0	2.18579		0	0	0.0698593
Tb427_000034000:pseudogene	501	0	0	0		0	0	0		0	0	0
Tb427_000034100:pseudogene	1278	2	0	0		1.56495	0	0		0.053081	0	0
Tb427_000034200:pseudogene	786	3	0	0		3.81679	0	0		0.129461	0	0
Tb427_000034300:pseudogene	642	0	0	0		0	0	0		0	0	0
Tb427_000034400	747	0	2	0		0	2.67738	0		0	0.086751	0
Tb427_000034500	696	0	0	2		0	0	2.87356		0	0	0.0918409
Tb427_000034600	810	0	0	0		0	0	0		0	0	0
Tb427_000034700:pseudogene	3060	0	0	0		0	0	0		0	0	0
Tb427_000034800:pseudogene	1053	2	0	0		1.89934	0	0		0.0644231	0	0
Tb427_000034900:pseudogene	873	0	0	0		0	0	0		0	0	0
Tb427_000035000:pseudogene	1503	0	0	0		0	0	0		0	0	0
Tb427_000035100	873	0	0	0		0	0	0		0	0	0
Tb427_000035200	732	0	0	0		0	0	0		0	0	0
Tb427_000035300:pseudogene	993	0	0	0		0	0	0		0	0	0
Tb427_000035400:pseudogene	927	0	0	0		0	0	0		0	0	0
Tb427_000035500	834	0	2	0		0	2.39808	0		0	0.0777015	0
Tb427_000035600	1728	10	6	12		5.78704	3.47222	6.94444		0.196289	0.112505	0.221949
Tb427_000035700:pseudogene	942	0	0	0		0	0	0		0	0	0
Tb427_000035800:pseudogene	2697	10	2	13		3.70782	0.741565	4.82017		0.125765	0.0240278	0.154056
Tb427_000035900:pseudogene	501	0	0	0		0	0	0		0	0	0
Tb427_000036000:pseudogene	1278	4	0	0		3.12989	0	0		0.106162	0	0
Tb427_000036100:pseudogene	786	0	0	0		0	0	0		0	0	0
Tb427_000036200:pseudogene	642	2	0	0		3.11526	0	0		0.105666	0	0
Tb427_000036300	747	0	0	0		0	0	0		0	0	0
Tb427_000036400	696	0	0	0		0	0	0		0	0	0
Tb427_000036500	810	4	0	2		4.93827	0	2.46914		0.1675	0	0.0789152
Tb427_000036600:pseudogene	2493	18	19	12		7.22022	7.62134	4.81348		0.244901	0.246943	0.153842
Tb427_000036700:pseudogene	1419	0	0	0		0	0	0		0	0	0
Tb427_000036800:pseudogene	1470	0	0	0		0	0	0		0	0	0
Tb427_000036900:pseudogene	558	0	0	0		0	0	0		0	0	0
Tb427_000037000:pseudogene	1413	0	0	0		0	0	0		0	0	0
Tb427_000037100:pseudogene	1542	0	0	0		0	0	0		0	0	0
Tb427_000037200:pseudogene	1584	0	0	0		0	0	0		0	0	0
Tb427_000037300:pseudogene	399	0	0	0		0	0	0		0	0	0
Tb427_000037400:pseudogene	1434	0	2	0		0	1.3947	0		0	0.0451904	0
Tb427_000037500:pseudogene	1554	0	0	0		0	0	0		0	0	0
Tb427_000037600:pseudogene	477	0	0	0		0	0	0		0	0	0
Tb427_000037700:pseudogene	1389	2	0	0		1.43988	0	0		0.0488391	0	0
Tb427_000037800	2511	4	11	7		1.59299	4.38072	2.78773		0.0540322	0.141942	0.0890978
Tb427_000037900	675	2	0	8		2.96296	0	11.8519		0.1005	0	0.378793
Tb427_000038000	738	4	0	4		5.42005	0	5.42005		0.183841	0	0.173228
Tb427_000038100:pseudogene	1416	0	0	0		0	0	0		0	0	0
Tb427_000038200:pseudogene	1509	0	0	0		0	0	0		0	0	0
Tb427_000038300:pseudogene	1542	0	0	0		0	0	0		0	0	0
Tb427_000038400:pseudogene	870	0	0	0		0	0	0		0	0	0
Tb427_000038500:pseudogene	1164	0	0	0		0	0	0		0	0	0
Tb427_000038600	165	0	0	0		0	0	0		0	0	0
Tb427_000038700:pseudogene	1533	0	2	0		0	1.30463	0		0	0.042272	0
Tb427_000038800:pseudogene	1557	0	0	1		0	0	0.642261		0	0	0.0205271
Tb427_000038900:pseudogene	867	0	0	0		0	0	0		0	0	0
Tb427_000039000:pseudogene	1431	0	2	0		0	1.39762	0		0	0.0452851	0
Tb427_000039100	858	0	0	0		0	0	0		0	0	0
Tb427_000039200:pseudogene	345	0	0	0		0	0	0		0	0	0
Tb427_000039300:pseudogene	1566	0	0	0		0	0	0		0	0	0
Tb427_000039400	1473	0	0	0		0	0	0		0	0	0
Tb427_000039500:pseudogene	1476	0	0	0		0	0	0		0	0	0
Tb427_000039600:pseudogene	1434	0	0	0		0	0	0		0	0	0
Tb427_000039700	684	0	0	0		0	0	0		0	0	0
Tb427_000039800:pseudogene	1539	0	0	2		0	0	1.29955		0	0	0.0415343
Tb427_000039900:pseudogene	369	0	0	0		0	0	0		0	0	0
Tb427_000040000	1647	0	0	0		0	0	0		0	0	0
Tb427_000040100	510	0	0	0		0	0	0		0	0	0
Tb427_000040200:pseudogene	1002	0	0	0		0	0	0		0	0	0
Tb427_000040300:pseudogene	450	0	0	0		0	0	0		0	0	0
Tb427_000040400	912	0	1	1		0	1.09649	1.09649		0	0.035528	0.0350446
Tb427_000040500	492	1	1	3		2.03252	2.03252	6.09756		0.0689405	0.0658567	0.194882
Tb427_000040600	2505	4	4	3		1.59681	1.59681	1.1976		0.0541617	0.0517389	0.0382762
Tb427_000040700	474	0	0	0		0	0	0		0	0	0
Tb427_000040800:pseudogene	798	0	0	0		0	0	0		0	0	0
Tb427_000040900:pseudogene	1593	0	0	0		0	0	0		0	0	0
Tb427_000041000:pseudogene	1515	0	0	0		0	0	0		0	0	0
Tb427_000041100:pseudogene	879	0	0	0		0	0	0		0	0	0
Tb427_000041200:pseudogene	1335	2	0	0		1.49813	0	0		0.0508146	0	0
Tb427_000041300	300	0	0	0		0	0	0		0	0	0
Tb427_000041400:pseudogene	873	0	0	0		0	0	0		0	0	0
Tb427_000041500:pseudogene	1239	0	0	0		0	0	0		0	0	0
Tb427_000041600	360	0	0	0		0	0	0		0	0	0
Tb427_000041700	1521	0	0	0		0	0	0		0	0	0
Tb427_000041800:pseudogene	1257	0	0	0		0	0	0		0	0	0
Tb427_000041900:pseudogene	468	0	0	0		0	0	0		0	0	0
Tb427_000042000:pseudogene	945	0	0	0		0	0	0		0	0	0
Tb427_000042100	531	0	0	0		0	0	0		0	0	0
Tb427_000042200	1458	43	3	3		29.4925	2.05761	2.05761		1.00035	0.0666698	0.0657626
Tb427_000042300:pseudogene	1494	0	0	0		0	0	0		0	0	0
Tb427_000042400	813	0	0	0		0	0	0		0	0	0
Tb427_000042500	714	0	0	0		0	0	0		0	0	0
Tb427_000042600	816	0	0	0		0	0	0		0	0	0
Tb427_000042700:pseudogene	1503	2	0	0		1.33067	0	0		0.0451347	0	0
Tb427_000042800:pseudogene	525	0	0	0		0	0	0		0	0	0
Tb427_000042900	1251	0	0	0		0	0	0		0	0	0
Tb427_000043000:pseudogene	723	0	1	0		0	1.38313	0		0	0.0448154	0
Tb427_000043100:pseudogene	1287	0	0	0		0	0	0		0	0	0
Tb427_000043200:pseudogene	1452	0	0	0		0	0	0		0	0	0
Tb427_000043300:pseudogene	2508	24	11	33		9.56938	4.38596	13.1579		0.324581	0.142112	0.420535
Tb427_000043400	1512	0	10	2		0	6.61376	1.32275		0	0.214296	0.042276
Tb427_000043500:pseudogene	1338	0	0	0		0	0	0		0	0	0
Tb427_000043600:pseudogene	1452	0	2	0		0	1.37741	0		0	0.0446302	0
Tb427_000043700	1350	0	0	0		0	0	0		0	0	0
Tb427_000043800:pseudogene	1347	0	0	0		0	0	0		0	0	0
Tb427_000043900:pseudogene	1323	0	0	0		0	0	0		0	0	0
Tb427_000044000:pseudogene	1443	0	0	2		0	0	1.386		0	0	0.0442975
Tb427_000044100:pseudogene	1452	0	0	0		0	0	0		0	0	0
Tb427_000044200:pseudogene	879	0	0	0		0	0	0		0	0	0
Tb427_000044300	1086	0	0	0		0	0	0		0	0	0
Tb427_000044400:pseudogene	756	0	0	0		0	0	0		0	0	0
Tb427_000044500:pseudogene	1197	0	0	0		0	0	0		0	0	0
Tb427_000044600:pseudogene	1245	0	0	0		0	0	0		0	0	0
Tb427_000044700	1242	0	0	0		0	0	0		0	0	0
Tb427_000044800:pseudogene	1395	0	0	0		0	0	0		0	0	0
Tb427_000044900:pseudogene	1236	0	0	0		0	0	0		0	0	0
Tb427_000045000:pseudogene	528	0	0	0		0	0	0		0	0	0
Tb427_000045100:pseudogene	909	0	0	0		0	0	0		0	0	0
Tb427_000045200:pseudogene	1221	0	0	0		0	0	0		0	0	0
Tb427_000045300:pseudogene	576	0	0	2		0	0	3.47222		0	0	0.110974
Tb427_000045400	609	0	0	0		0	0	0		0	0	0
Tb427_000045500:pseudogene	2493	1	2	4		0.401123	0.802246	1.60449		0.0136056	0.025994	0.0512806
Tb427_000045600:pseudogene	1254	0	0	0		0	0	0		0	0	0
Tb427_000045700:pseudogene	885	0	0	0		0	0	0		0	0	0
Tb427_000045800:pseudogene	1590	2	0	0		1.25786	0	0		0.0426651	0	0
Tb427_000045900	837	0	0	0		0	0	0		0	0	0
Tb427_000046000:pseudogene	1641	0	0	0		0	0	0		0	0	0
Tb427_000046100:pseudogene	1458	0	0	0		0	0	0		0	0	0
Tb427_000046200:pseudogene	1164	0	0	0		0	0	0		0	0	0
Tb427_000046300:pseudogene	2490	2	3	8		0.803213	1.20482	3.21285		0.027244	0.039038	0.102685
Tb427_000046400	750	0	0	0		0	0	0		0	0	0
Tb427_000046500	1641	0	0	0		0	0	0		0	0	0
Tb427_000046600:pseudogene	1557	0	0	0		0	0	0		0	0	0
Tb427_000046700:pseudogene	2490	21	6	12		8.43373	2.40964	4.81928		0.286062	0.0780759	0.154027
Tb427_000046800:pseudogene	1572	0	0	0		0	0	0		0	0	0
Tb427_000046900:pseudogene	546	0	0	0		0	0	0		0	0	0
Tb427_000047000:pseudogene	849	0	0	0		0	0	0		0	0	0
Tb427_000047100	1476	0	0	2		0	0	1.35501		0	0	0.0433071
Tb427_000047200:pseudogene	1449	0	0	0		0	0	0		0	0	0
Tb427_000047300:pseudogene	666	0	0	0		0	0	0		0	0	0
Tb427_000047400:pseudogene	1512	1	0	0		0.661376	0	0		0.022433	0	0
Tb427_000047500:pseudogene	729	2	0	0		2.74348	0	0		0.0930555	0	0
Tb427_000047600:pseudogene	1290	4	0	0		3.10078	0	0		0.105174	0	0
Tb427_000047700:pseudogene	504	0	0	0		0	0	0		0	0	0
Tb427_000047800	1770	0	4	3		0	2.25989	1.69492		0	0.0732237	0.0541706
Tb427_000047900	804	0	0	0		0	0	0		0	0	0
Tb427_000048000:pseudogene	1536	0	0	1		0	0	0.651042		0	0	0.0208077
Tb427_000048100:pseudogene	786	0	0	0		0	0	0		0	0	0
Tb427_000048200:pseudogene	1521	0	0	0		0	0	0		0	0	0
Tb427_000048300	336	0	0	0		0	0	0		0	0	0
Tb427_000048400:pseudogene	1350	0	0	0		0	0	0		0	0	0
Tb427_000048500:pseudogene	741	0	0	0		0	0	0		0	0	0
Tb427_000048600:pseudogene	1347	0	0	0		0	0	0		0	0	0
Tb427_000048700	729	0	0	0		0	0	0		0	0	0
Tb427_000048800	1353	0	0	0		0	0	0		0	0	0
Tb427_000048900:pseudogene	1326	0	0	0		0	0	0		0	0	0
Tb427_000049000:pseudogene	885	0	0	0		0	0	0		0	0	0
Tb427_000049100:pseudogene	1146	0	0	0		0	0	0		0	0	0
Tb427_000049200:pseudogene	1215	0	0	0		0	0	0		0	0	0
Tb427_000049300:pseudogene	849	0	0	0		0	0	0		0	0	0
Tb427_000049400	1380	0	0	0		0	0	0		0	0	0
Tb427_000049500:pseudogene	1389	0	0	0		0	0	0		0	0	0
Tb427_000049600	138	0	0	0		0	0	0		0	0	0
Tb427_000049700:pseudogene	906	0	0	0		0	0	0		0	0	0
Tb427_000049800:pseudogene	1404	0	0	0		0	0	0		0	0	0
Tb427_000049900	1548	0	0	0		0	0	0		0	0	0
Tb427_000050000:pseudogene	885	0	0	0		0	0	0		0	0	0
Tb427_000050100:pseudogene	1590	0	0	0		0	0	0		0	0	0
Tb427_000050200:pseudogene	984	0	0	0		0	0	0		0	0	0
Tb427_000050300:pseudogene	513	0	0	0		0	0	0		0	0	0
Tb427_000050400	1497	0	0	0		0	0	0		0	0	0
Tb427_000050500:pseudogene	399	0	0	0		0	0	0		0	0	0
Tb427_000050600:pseudogene	1326	0	0	0		0	0	0		0	0	0
Tb427_000050700:pseudogene	1317	2	0	0		1.5186	0	0		0.0515091	0	0
Tb427_000050800:pseudogene	897	2	0	0		2.22965	0	0		0.0756271	0	0
Tb427_000050900	1470	0	0	1		0	0	0.680272		0	0	0.0217419
Tb427_000051000:pseudogene	1368	0	0	0		0	0	0		0	0	0
Tb427_000051100:pseudogene	1503	0	0	0		0	0	0		0	0	0
Tb427_000051200	738	0	0	0		0	0	0		0	0	0
Tb427_000051300:pseudogene	1224	0	0	0		0	0	0		0	0	0
Tb427_000051400:pseudogene	963	0	0	0		0	0	0		0	0	0
Tb427_000051500:pseudogene	1293	0	0	0		0	0	0		0	0	0
Tb427_000051600:pseudogene	1641	0	0	0		0	0	0		0	0	0
Tb427_000051700	1338	0	0	0		0	0	0		0	0	0
Tb427_000051800	1533	0	0	0		0	0	0		0	0	0
Tb427_000051900:pseudogene	1290	0	0	0		0	0	0		0	0	0
Tb427_000052000:pseudogene	534	0	0	0		0	0	0		0	0	0
Tb427_000052100:pseudogene	270	4	0	0		14.8148	0	0		0.5025	0	0
Tb427_000052200:pseudogene	1416	0	0	0		0	0	0		0	0	0
Tb427_000052300	1467	0	0	0		0	0	0		0	0	0
Tb427_000052400:pseudogene	1278	0	0	0		0	0	0		0	0	0
Tb427_000052500	1146	0	0	0		0	0	0		0	0	0
Tb427_000052600:pseudogene	1473	0	0	0		0	0	0		0	0	0
Tb427_000052700	600	0	0	0		0	0	0		0	0	0
Tb427_000052800:pseudogene	546	0	0	0		0	0	0		0	0	0
Tb427_000052900:pseudogene	885	0	0	0		0	0	0		0	0	0
Tb427_000053000	711	0	0	0		0	0	0		0	0	0
Tb427_000053100:pseudogene	1290	0	2	0		0	1.55039	0		0	0.0502349	0
Tb427_000053200:pseudogene	1494	4	1	2		2.67738	0.669344	1.33869		0.0908132	0.0216878	0.0427853
Tb427_000053300:pseudogene	636	0	0	0		0	0	0		0	0	0
Tb427_000053400:pseudogene	1317	0	0	0		0	0	0		0	0	0
Tb427_000053500:pseudogene	1644	39	78	24		23.7226	47.4453	14.5985		0.804642	1.5373	0.466579
Tb427_000053600	750	0	0	0		0	0	0		0	0	0
Tb427_000053700	1614	0	0	0		0	0	0		0	0	0
Tb427_000053800	969	0	0	0		0	0	0		0	0	0
Tb427_000053900:pseudogene	1293	0	0	0		0	0	0		0	0	0
Tb427_000054000:pseudogene	516	0	0	0		0	0	0		0	0	0
Tb427_000054100	483	0	0	0		0	0	0		0	0	0
Tb427_000054200	495	0	0	0		0	0	0		0	0	0
Tb427_000054300:pseudogene	1212	0	0	0		0	0	0		0	0	0
Tb427_000054400:pseudogene	666	2	4	1		3.003	6.00601	1.5015		0.101858	0.194604	0.047989
Tb427_000054500:pseudogene	882	0	0	0		0	0	0		0	0	0
Tb427_000054600:pseudogene	807	0	0	0		0	0	0		0	0	0
Tb427_000054700:pseudogene	1302	0	2	2		0	1.5361	1.5361		0	0.0497719	0.0490947
Tb427_000054900	1033	454	508	568		439.497	491.772	549.855		14.9072	15.9341	17.5737
Tb427_000055000	345	0	0	1		0	0	2.89855		0	0	0.0926395
Tb427_000055100:pseudogene	1224	0	0	0		0	0	0		0	0	0
Tb427_000055200	1791	0	0	3		0	0	1.67504		0	0	0.0535354
Tb427_000055300	1692	2	1	0		1.18203	0.591017	0		0.0400931	0.0191498	0
Tb427_000055400	639	0	0	0		0	0	0		0	0	0
Tb427_000055500	420	0	0	0		0	0	0		0	0	0
Tb427_000055600	627	0	0	0		0	0	0		0	0	0
Tb427_000055700:pseudogene	1542	0	0	0		0	0	0		0	0	0
Tb427_000055800:pseudogene	1464	0	0	0		0	0	0		0	0	0
Tb427_000055900	1056	0	0	0		0	0	0		0	0	0
Tb427_000056000:pseudogene	1557	0	0	0		0	0	0		0	0	0
Tb427_000056100:pseudogene	729	0	0	0		0	0	0		0	0	0
Tb427_000056200	645	0	0	0		0	0	0		0	0	0
Tb427_000056300:pseudogene	2490	4	4	2		1.60643	1.60643	0.803213		0.0544879	0.0520506	0.0256712
Tb427_000056400:pseudogene	819	0	0	0		0	0	0		0	0	0
Tb427_000056500	555	0	0	0		0	0	0		0	0	0
Tb427_000056600:pseudogene	1266	0	0	0		0	0	0		0	0	0
Tb427_000056700:pseudogene	1494	4	0	0		2.67738	0	0		0.0908132	0	0
Tb427_000056800:pseudogene	1413	0	0	0		0	0	0		0	0	0
Tb427_000056900	1314	0	0	0		0	0	0		0	0	0
Tb427_000057000:pseudogene	1440	0	0	0		0	0	0		0	0	0
Tb427_000057100	567	0	0	0		0	0	0		0	0	0
Tb427_000057200	462	0	0	0		0	0	0		0	0	0
Tb427_000057300:pseudogene	1440	0	0	0		0	0	0		0	0	0
Tb427_000057400:pseudogene	990	0	0	0		0	0	0		0	0	0
Tb427_000057500	288	0	0	0		0	0	0		0	0	0
Tb427_000057600	507	0	0	0		0	0	0		0	0	0
Tb427_000057700:pseudogene	819	2	0	0		2.442	0	0		0.0828297	0	0
Tb427_000057800:pseudogene	1839	20	18	8		10.8755	9.78793	4.35019		0.368882	0.317144	0.139035
Tb427_000057900:pseudogene	1980	32	8	4		16.1616	4.0404	2.0202		0.548182	0.130915	0.064567
Tb427_000058000:pseudogene	729	2	0	0		2.74348	0	0		0.0930555	0	0
Tb427_000058100	1683	2	3	3		1.18835	1.78253	1.78253		0.0403075	0.0577567	0.0569708
Tb427_000058200:pseudogene	888	0	0	0		0	0	0		0	0	0
Tb427_000058300:pseudogene	1326	0	0	0		0	0	0		0	0	0
Tb427_000058400:pseudogene	1338	2	0	0		1.49477	0	0		0.0507007	0	0
Tb427_000058500:pseudogene	1272	0	0	0		0	0	0		0	0	0
Tb427_000058600	360	0	0	0		0	0	0		0	0	0
Tb427_000058700:pseudogene	2490	11	9	8		4.41767	3.61446	3.21285		0.149842	0.117114	0.102685
Tb427_000058800:pseudogene	1359	0	0	0		0	0	0		0	0	0
Tb427_000058900:pseudogene	1338	2	0	0		1.49477	0	0		0.0507007	0	0
Tb427_000059000	1485	2	8	0		1.3468	5.38721	0		0.0456818	0.174554	0
Tb427_000059100:pseudogene	846	0	0	0		0	0	0		0	0	0
Tb427_000059200:pseudogene	1323	0	0	0		0	0	0		0	0	0
Tb427_000059300	699	0	0	0		0	0	0		0	0	0
Tb427_000059400	363	0	2	0		0	5.50964	0		0	0.178521	0
Tb427_000059500:pseudogene	2490	6	7	14		2.40964	2.81124	5.62249		0.0817319	0.0910886	0.179698
Tb427_000059600:pseudogene	1449	0	0	0		0	0	0		0	0	0
Tb427_000059700:pseudogene	1488	0	0	0		0	0	0		0	0	0
Tb427_000059800	1521	0	1	2		0	0.657462	1.31492		0	0.0213028	0.0420258
Tb427_000059900:pseudogene	1242	0	0	0		0	0	0		0	0	0
Tb427_000060000:pseudogene	1494	2	0	0		1.33869	0	0		0.0454066	0	0
Tb427_000060100:pseudogene	1248	0	0	0		0	0	0		0	0	0
Tb427_000060200	720	0	0	0		0	0	0		0	0	0
Tb427_000060300:pseudogene	1461	0	0	0		0	0	0		0	0	0
Tb427_000060400	753	0	0	0		0	0	0		0	0	0
Tb427_000060500	579	0	0	0		0	0	0		0	0	0
Tb427_000060600:pseudogene	1419	0	0	0		0	0	0		0	0	0
Tb427_000060700:pseudogene	1461	0	2	0		0	1.36893	0		0	0.0443552	0
Tb427_000060800	819	0	0	0		0	0	0		0	0	0
Tb427_000060900:pseudogene	1494	0	0	0		0	0	0		0	0	0
Tb427_000061000	381	0	0	0		0	0	0		0	0	0
Tb427_000061100	357	0	0	0		0	0	0		0	0	0
Tb427_000061200	681	0	0	0		0	0	0		0	0	0
Tb427_000061300	1524	0	0	0		0	0	0		0	0	0
Tb427_000061400:pseudogene	1236	0	0	0		0	0	0		0	0	0
Tb427_000061500:pseudogene	1527	0	0	0		0	0	0		0	0	0
Tb427_000061600:pseudogene	1308	0	0	0		0	0	0		0	0	0
Tb427_000061700	1446	2	2	0		1.38313	1.38313	0		0.0469139	0.0448154	0
Tb427_000061800:pseudogene	894	0	0	0		0	0	0		0	0	0
Tb427_000061900:pseudogene	1242	0	0	0		0	0	0		0	0	0
Tb427_000062000:pseudogene	945	2	0	0		2.1164	0	0		0.0717857	0	0
Tb427_000062100:pseudogene	1491	18	0	0		12.0724	0	0		0.409482	0	0
Tb427_000062200:pseudogene	876	0	0	0		0	0	0		0	0	0
Tb427_000062300	1152	0	0	0		0	0	0		0	0	0
Tb427_000062400	1488	0	0	0		0	0	0		0	0	0
Tb427_000062500:pseudogene	1413	0	0	0		0	0	0		0	0	0
Tb427_000062600:pseudogene	942	0	0	0		0	0	0		0	0	0
Tb427_000062700:pseudogene	1521	2	0	0		1.31492	0	0		0.0446006	0	0
Tb427_000062800:pseudogene	1704	0	0	0		0	0	0		0	0	0
Tb427_000062900	321	0	0	0		0	0	0		0	0	0
Tb427_000063000	1512	0	0	0		0	0	0		0	0	0
Tb427_000063100:pseudogene	1503	0	0	0		0	0	0		0	0	0
Tb427_000063200	1566	0	0	4		0	0	2.55428		0	0	0.0816364
Tb427_000063300	1500	0	0	0		0	0	0		0	0	0
Tb427_000063400:pseudogene	1581	2	0	0		1.26502	0	0		0.042908	0	0
Tb427_000063500:pseudogene	873	0	0	0		0	0	0		0	0	0
Tb427_000063600:pseudogene	864	0	0	0		0	0	0		0	0	0
Tb427_000063700:pseudogene	1338	0	0	0		0	0	0		0	0	0
Tb427_000063800:pseudogene	1503	2	0	0		1.33067	0	0		0.0451347	0	0
Tb427_000063900:pseudogene	1599	0	0	0		0	0	0		0	0	0
Tb427_000064000	1512	4	0	0		2.6455	0	0		0.0897321	0	0
Tb427_000064100:pseudogene	513	0	0	0		0	0	0		0	0	0
Tb427_000064200	1008	0	0	0		0	0	0		0	0	0
Tb427_000064300:pseudogene	480	0	0	0		0	0	0		0	0	0
Tb427_000064400	786	0	0	0		0	0	0		0	0	0
Tb427_000064500	1566	0	0	0		0	0	0		0	0	0
Tb427_000064600:pseudogene	798	0	0	0		0	0	0		0	0	0
Tb427_000064700:pseudogene	1071	0	0	0		0	0	0		0	0	0
Tb427_000064800:pseudogene	1509	0	0	0		0	0	0		0	0	0
Tb427_000064900:pseudogene	861	0	0	0		0	0	0		0	0	0
Tb427_000065000	1467	0	0	0		0	0	0		0	0	0
Tb427_000065100	1506	0	0	0		0	0	0		0	0	0
Tb427_000065200:pseudogene	864	0	0	0		0	0	0		0	0	0
Tb427_000065300	1491	0	0	0		0	0	0		0	0	0
Tb427_000065400:pseudogene	1380	0	0	0		0	0	0		0	0	0
Tb427_000065500	525	0	0	0		0	0	0		0	0	0
Tb427_000065600	774	2	2	0		2.58398	2.58398	0		0.0876453	0.0837248	0
Tb427_000065700	582	0	0	0		0	0	0		0	0	0
Tb427_000065800	1383	0	0	0		0	0	0		0	0	0
Tb427_000065900:pseudogene	837	0	0	0		0	0	0		0	0	0
Tb427_000066000	1527	0	0	0		0	0	0		0	0	0
Tb427_000066100	1449	0	0	0		0	0	0		0	0	0
Tb427_000066200:pseudogene	2493	10	5	2		4.01123	2.00562	0.802246		0.136056	0.064985	0.0256403
Tb427_000066300:pseudogene	705	0	0	0		0	0	0		0	0	0
Tb427_000066400	1605	2	0	1		1.24611	0	0.623053		0.0422663	0	0.0199132
Tb427_000066500:pseudogene	1470	0	0	0		0	0	0		0	0	0
Tb427_000066600:pseudogene	2493	0	0	3		0	0	1.20337		0	0	0.0384605
Tb427_000066700	237	0	0	0		0	0	0		0	0	0
Tb427_000066800:pseudogene	1413	0	0	0		0	0	0		0	0	0
Tb427_000066900:pseudogene	669	1	0	0		1.49477	0	0		0.0507007	0	0
Tb427_000067000:pseudogene	855	0	0	0		0	0	0		0	0	0
Tb427_000067100:pseudogene	1482	0	0	0		0	0	0		0	0	0
Tb427_000067200:pseudogene	366	0	0	0		0	0	0		0	0	0
Tb427_000067300	540	0	0	0		0	0	0		0	0	0
Tb427_000067400	573	0	0	0		0	0	0		0	0	0
Tb427_000067500:pseudogene	855	0	0	0		0	0	0		0	0	0
Tb427_000067600:pseudogene	1482	0	0	0		0	0	0		0	0	0
Tb427_000067700:pseudogene	366	0	0	0		0	0	0		0	0	0
Tb427_000067800	540	0	0	0		0	0	0		0	0	0
Tb427_000067900	573	0	0	0		0	0	0		0	0	0
Tb427_000068000:pseudogene	855	0	0	0		0	0	0		0	0	0
Tb427_000068100:pseudogene	1482	0	0	0		0	0	0		0	0	0
Tb427_000068200:pseudogene	366	0	0	0		0	0	0		0	0	0
Tb427_000068300	540	0	0	0		0	0	0		0	0	0
Tb427_000068400	573	0	0	0		0	0	0		0	0	0
Tb427_000068500:pseudogene	1578	0	0	0		0	0	0		0	0	0
Tb427_000068600:pseudogene	1494	0	0	0		0	0	0		0	0	0
Tb427_000068700:pseudogene	900	0	0	0		0	0	0		0	0	0
Tb427_000068800	1491	0	0	0		0	0	0		0	0	0
Tb427_000068900:pseudogene	1305	0	0	0		0	0	0		0	0	0
Tb427_000069000	1149	1	0	0		0.870322	0	0		0.0295202	0	0
Tb427_000069100	312	0	0	0		0	0	0		0	0	0
Tb427_000069200	1707	0	2	2		0	1.17165	1.17165		0	0.0379631	0.0374466
Tb427_000069300	1269	0	0	0		0	0	0		0	0	0
Tb427_000069400:pseudogene	1839	5	3	6		2.71887	1.63132	3.26264		0.0922206	0.0528573	0.104276
Tb427_000069500:pseudogene	816	0	0	0		0	0	0		0	0	0
Tb427_000069600:pseudogene	729	0	1	5		0	1.37174	6.85871		0	0.0444465	0.219209
Tb427_000069700:pseudogene	330	1	0	0		3.0303	0	0		0.102784	0	0
Tb427_000069800:pseudogene	1299	0	1	0		0	0.769823	0		0	0.0249434	0
Tb427_000069900	483	0	0	0		0	0	0		0	0	0
Tb427_000070000:pseudogene	1404	0	0	0		0	0	0		0	0	0
Tb427_000070100	624	0	0	0		0	0	0		0	0	0
Tb427_000070200	393	0	0	0		0	0	0		0	0	0
Tb427_000070300:pseudogene	2700	1	0	0		0.37037	0	0		0.0125625	0	0
Tb427_000070400:pseudogene	462	0	0	0		0	0	0		0	0	0
Tb427_000070500	678	0	0	0		0	0	0		0	0	0
Tb427_000070600	516	0	0	0		0	0	0		0	0	0
Tb427_000070700:pseudogene	822	0	0	0		0	0	0		0	0	0
Tb427_000070800:pseudogene	1308	0	0	0		0	0	0		0	0	0
Tb427_000070900:pseudogene	783	0	0	0		0	0	0		0	0	0
Tb427_000071000:pseudogene	639	0	0	0		0	0	0		0	0	0
Tb427_000071100	522	0	0	0		0	0	0		0	0	0
Tb427_000071200	675	0	2	0		0	2.96296	0		0	0.0960045	0
Tb427_000071300	2757	4	2	4		1.45085	0.725426	1.45085		0.0492111	0.0235049	0.0463702
Tb427_000071400	927	0	0	0		0	0	0		0	0	0
Tb427_000071500:pseudogene	1035	0	0	0		0	0	0		0	0	0
Tb427_000071600:pseudogene	1383	0	0	0		0	0	0		0	0	0
Tb427_000071700	1503	0	0	0		0	0	0		0	0	0
Tb427_000071800	1476	0	0	0		0	0	0		0	0	0
Tb427_000071900:pseudogene	972	0	0	0		0	0	0		0	0	0
Tb427_000072000:pseudogene	1491	0	0	0		0	0	0		0	0	0
Tb427_000072100:pseudogene	864	0	0	0		0	0	0		0	0	0
Tb427_000072200:pseudogene	1446	0	0	0		0	0	0		0	0	0
Tb427_000072300:pseudogene	900	0	1	0		0	1.11111	0		0	0.0360017	0
Tb427_000072400	792	0	0	0		0	0	0		0	0	0
Tb427_000072500	444	2	0	0		4.5045	0	0		0.152787	0	0
Tb427_000072600	498	0	2	4		0	4.01606	8.03213		0	0.130127	0.256712
Tb427_000072700	1569	4	0	2		2.54939	0	1.2747		0.0864723	0	0.0407401
Tb427_000072800:pseudogene	1470	0	0	0		0	0	0		0	0	0
Tb427_000072900:pseudogene	1386	0	0	0		0	0	0		0	0	0
Tb427_000073000:pseudogene	1491	9	4	1		6.03622	2.68276	0.670691		0.204741	0.0869256	0.0214357
Tb427_000073100:pseudogene	642	0	0	0		0	0	0		0	0	0
Tb427_000073200:pseudogene	1008	0	0	0		0	0	0		0	0	0
Tb427_000073300:pseudogene	957	0	0	0		0	0	0		0	0	0
Tb427_000073400:pseudogene	1191	0	0	0		0	0	0		0	0	0
Tb427_000073500	753	0	0	0		0	0	0		0	0	0
Tb427_000073600:pseudogene	1317	2	0	0		1.5186	0	0		0.0515091	0	0
Tb427_000073700:pseudogene	579	625	592	687		1079.45	1022.45	1186.53		36.6135	33.129	37.9222
Tb427_000073800:pseudogene	1284	0	0	0		0	0	0		0	0	0
Tb427_000073900:pseudogene	873	0	0	0		0	0	0		0	0	0
Tb427_000074000:pseudogene	888	6	6	2		6.75676	6.75676	2.25225		0.229181	0.218929	0.0719834
Tb427_000074100	2103	9	12	4		4.2796	5.70613	1.90204		0.145159	0.184887	0.0607906
Tb427_000074200	1630	564	545	662		346.012	334.356	406.135		11.7363	10.8336	12.9803
Tb427_000074400	864	6	3	6		6.94444	3.47222	6.94444		0.235547	0.112505	0.221949
Tb427_000074500	1641	4	3	4		2.43754	1.82815	2.43754		0.0826782	0.0592349	0.0779053
Tb427_000074600	597	0	1	0		0	1.67504	0		0	0.0542739	0
Tb427_000074700	1527	0	0	0		0	0	0		0	0	0
Tb427_000074800:pseudogene	1254	0	0	0		0	0	0		0	0	0
Tb427_000074900:pseudogene	1311	2	0	0		1.52555	0	0		0.0517448	0	0
Tb427_000075000	1509	0	2	5		0	1.32538	3.31345		0	0.0429443	0.1059
Tb427_000075100	1674	1915	2090	2257		1143.97	1248.51	1348.27		38.8019	40.4535	43.0915
Tb427_000075300:pseudogene	1497	0	0	1		0	0	0.668003		0	0	0.0213498
Tb427_000075400:pseudogene	666	0	0	0		0	0	0		0	0	0
Tb427_000075500:pseudogene	1212	2	0	0		1.65017	0	0		0.0559715	0	0
Tb427_000075600	360	0	0	0		0	0	0		0	0	0
Tb427_000075700	1455	2	0	4		1.37457	0	2.74914		0.0466237	0	0.0878643
Tb427_000075800	1500	0	2	0		0	1.33333	0		0	0.043202	0
Tb427_000075900:pseudogene	633	0	0	0		0	0	0		0	0	0
Tb427_000076000:pseudogene	1473	1	0	5		0.678887	0	3.39443		0.023027	0	0.108488
Tb427_000076100	858	0	0	0		0	0	0		0	0	0
Tb427_000076200:pseudogene	468	0	2	0		0	4.2735	0		0	0.138468	0
Tb427_000076300	279	0	0	0		0	0	0		0	0	0
Tb427_000076400	1185	2	2	1		1.68776	1.68776	0.843882		0.0572468	0.0546861	0.026971
Tb427_000076500:pseudogene	825	0	0	0		0	0	0		0	0	0
Tb427_000076600:pseudogene	1020	0	0	2		0	0	1.96078		0	0	0.0626679
Tb427_000076700	1365	0	0	0		0	0	0		0	0	0
Tb427_000076800:pseudogene	1302	1	1	0		0.768049	0.768049	0		0.0260513	0.0248859	0
Tb427_000076900:pseudogene	1254	0	0	0		0	0	0		0	0	0
Tb427_000077000:pseudogene	1596	0	0	0		0	0	0		0	0	0
Tb427_000077100:pseudogene	1344	2	0	0		1.4881	0	0		0.0504743	0	0
Tb427_000077200:pseudogene	1299	0	0	0		0	0	0		0	0	0
Tb427_000077300	639	0	0	0		0	0	0		0	0	0
Tb427_000077400:pseudogene	798	0	0	0		0	0	0		0	0	0
Tb427_000077500:pseudogene	1488	0	2	0		0	1.34409	0		0	0.0435504	0
Tb427_000077600	1536	0	0	2		0	0	1.30208		0	0	0.0416154
Tb427_000077700:pseudogene	1443	0	0	0		0	0	0		0	0	0
Tb427_000077800:pseudogene	1506	0	0	0		0	0	0		0	0	0
Tb427_000077900	1599	0	0	0		0	0	0		0	0	0
Tb427_000078000:pseudogene	1506	2	0	2		1.32802	0	1.32802		0.0450448	0	0.0424444
Tb427_000078100:pseudogene	894	0	0	0		0	0	0		0	0	0
Tb427_000078200:pseudogene	1356	0	6	2		0	4.42478	1.47493		0	0.143369	0.0471396
Tb427_000078300	660	0	0	1		0	0	1.51515		0	0	0.0484252
Tb427_000078400:pseudogene	1377	0	2	0		0	1.45243	0		0	0.047061	0
Tb427_000078500	333	0	1	0		0	3.003	0		0	0.0973018	0
Tb427_000078600	537	0	1	0		0	1.8622	0		0	0.060338	0
Tb427_000078700	486	0	0	2		0	0	4.11523		0	0	0.131525
Tb427_000078800:pseudogene	897	0	0	0		0	0	0		0	0	0
Tb427_000078900:pseudogene	1260	0	2	2		0	1.5873	1.5873		0	0.051431	0.0507312
Tb427_000079000:pseudogene	342	0	0	0		0	0	0		0	0	0
Tb427_000079100	1572	0	0	0		0	0	0		0	0	0
Tb427_000079200:pseudogene	1158	0	2	4		0	1.72712	3.45423		0	0.0559611	0.110399
Tb427_000079300	630	0	0	0		0	0	0		0	0	0
Tb427_000079400:pseudogene	1341	0	0	0		0	0	0		0	0	0
Tb427_000079500:pseudogene	1434	0	0	0		0	0	0		0	0	0
Tb427_000079600:pseudogene	666	0	0	0		0	0	0		0	0	0
Tb427_000079700:pseudogene	1203	0	0	0		0	0	0		0	0	0
Tb427_000079800:pseudogene	1338	0	0	4		0	0	2.98954		0	0	0.0955475
Tb427_000079900	366	0	0	0		0	0	0		0	0	0
Tb427_000080000	597	0	0	2		0	0	3.35008		0	0	0.107071
Tb427_000080100:pseudogene	861	0	0	0		0	0	0		0	0	0
Tb427_000080200:pseudogene	1191	0	0	0		0	0	0		0	0	0
Tb427_000080300	1485	4	0	0		2.6936	0	0		0.0913636	0	0
Tb427_000080400:pseudogene	1533	0	0	0		0	0	0		0	0	0
Tb427_000080500:pseudogene	945	0	5	0		0	5.29101	0		0	0.171437	0
Tb427_000080600:pseudogene	1497	0	0	2		0	0	1.33601		0	0	0.0426996
Tb427_000080700	1452	0	0	0		0	0	0		0	0	0
Tb427_000080800:pseudogene	876	0	0	0		0	0	0		0	0	0
Tb427_000080900	1056	0	0	0		0	0	0		0	0	0
Tb427_000081000:pseudogene	879	0	0	0		0	0	0		0	0	0
Tb427_000081100	1083	0	0	0		0	0	0		0	0	0
Tb427_000081200	669	0	0	0		0	0	0		0	0	0
Tb427_000081300:pseudogene	735	0	0	0		0	0	0		0	0	0
Tb427_000081400	318	0	0	0		0	0	0		0	0	0
Tb427_000081500:pseudogene	1218	0	0	0		0	0	0		0	0	0
Tb427_000081600:pseudogene	1359	0	0	0		0	0	0		0	0	0
Tb427_000081700	429	0	0	0		0	0	0		0	0	0
Tb427_000081800	606	0	0	0		0	0	0		0	0	0
Tb427_000081900:pseudogene	3048	16	27	42		5.24934	8.85827	13.7795		0.178051	0.287021	0.440403
Tb427_000082000:pseudogene	1353	0	0	0		0	0	0		0	0	0
Tb427_000082100:pseudogene	2499	18	32	26		7.20288	12.8051	10.4042		0.244313	0.414905	0.332524
Tb427_000082200:pseudogene	1650	0	0	0		0	0	0		0	0	0
Tb427_000082300:pseudogene	1317	0	0	0		0	0	0		0	0	0
Tb427_000082400:pseudogene	789	0	0	0		0	0	0		0	0	0
Tb427_000082500:pseudogene	840	0	0	0		0	0	0		0	0	0
Tb427_000082600:pseudogene	1374	4	0	0		2.91121	0	0		0.0987445	0	0
Tb427_000082700:pseudogene	510	0	0	0		0	0	0		0	0	0
Tb427_000082800	2406	25	16	16		10.3907	6.65004	6.65004		0.352439	0.215471	0.21254
Tb427_000082900	1578	4	1	3		2.53485	0.633714	1.90114		0.0859791	0.0205333	0.0607617
Tb427_000083000	816	29	63	33		35.5392	77.2059	40.4412		1.20545	2.50159	1.29253
Tb427_000083200	169	18	14	22		106.509	82.8402	130.178		3.61265	2.68415	4.16056
Tb427_000083300:pseudogene	2496	12	21	13		4.80769	8.41346	5.20833		0.163071	0.272609	0.166462
Tb427_000083400:pseudogene	1491	5	6	2		3.35345	4.02414	1.34138		0.113745	0.130388	0.0428714
Tb427_000083500:pseudogene	1671	0	0	0		0	0	0		0	0	0
Tb427_000083600	1461	0	0	0		0	0	0		0	0	0
Tb427_000083700:pseudogene	1470	0	0	0		0	0	0		0	0	0
Tb427_000083800:pseudogene	861	0	0	0		0	0	0		0	0	0
Tb427_000083900:pseudogene	1374	0	0	2		0	0	1.4556		0	0	0.046522
Tb427_000084000:pseudogene	1554	0	0	0		0	0	0		0	0	0
Tb427_000084100	978	0	0	4		0	0	4.08998		0	0	0.130718
Tb427_000084200	1614	0	0	4		0	0	2.47831		0	0	0.0792085
Tb427_000084300:pseudogene	381	0	0	0		0	0	0		0	0	0
Tb427_000084400:pseudogene	1491	0	2	0		0	1.34138	0		0	0.0434628	0
Tb427_000084500:pseudogene	1524	0	0	0		0	0	0		0	0	0
Tb427_000084600:pseudogene	1560	2	0	2		1.28205	0	1.28205		0.0434856	0	0.0409752
Tb427_000084700:pseudogene	1332	0	0	0		0	0	0		0	0	0
Tb427_000084800:pseudogene	879	0	0	0		0	0	0		0	0	0
Tb427_000084900:pseudogene	840	0	0	0		0	0	0		0	0	0
Tb427_000085000:pseudogene	1446	0	0	0		0	0	0		0	0	0
Tb427_000085100	1164	0	0	0		0	0	0		0	0	0
Tb427_000085200:pseudogene	1239	0	0	0		0	0	0		0	0	0
Tb427_000085300	1449	0	0	0		0	0	0		0	0	0
Tb427_000085400	1365	0	0	2		0	0	1.4652		0	0	0.0468288
Tb427_000085500:pseudogene	930	0	0	0		0	0	0		0	0	0
Tb427_000085600:pseudogene	1899	4	10	2		2.10637	5.26593	1.05319		0.0714455	0.170624	0.0336605
Tb427_000085700	1431	0	0	0		0	0	0		0	0	0
Tb427_000085800:pseudogene	1146	0	0	0		0	0	0		0	0	0
Tb427_000085900:pseudogene	1431	0	0	0		0	0	0		0	0	0
Tb427_000086000	1479	0	0	0		0	0	0		0	0	0
Tb427_000086100	339	0	0	0		0	0	0		0	0	0
Tb427_000086200	1536	0	0	2		0	0	1.30208		0	0	0.0416154
Tb427_000086300	1491	2	0	0		1.34138	0	0		0.045498	0	0
Tb427_000086400:pseudogene	948	0	0	2		0	0	2.1097		0	0	0.0674275
Tb427_000086500:pseudogene	1428	2	0	0		1.40056	0	0		0.0475052	0	0
Tb427_000086600	1233	0	2	2		0	1.62206	1.62206		0	0.0525572	0.0518421
Tb427_000086700:pseudogene	867	0	0	0		0	0	0		0	0	0
Tb427_000086800	1602	0	0	0		0	0	0		0	0	0
Tb427_000086900:pseudogene	1626	6	6	3		3.69004	3.69004	1.84502		0.125161	0.119563	0.058968
Tb427_000087000:pseudogene	1479	2	0	0		1.35227	0	0		0.0458671	0	0
Tb427_000087100	444	4	2	0		9.00901	4.5045	0		0.305574	0.145953	0
Tb427_000087200	765	2	0	0		2.61438	0	0		0.0886765	0	0
Tb427_000087300	582	0	0	0		0	0	0		0	0	0
Tb427_000087400	1683	5	8	4		2.97089	4.75342	2.37671		0.100769	0.154018	0.0759611
Tb427_000087500	897	0	0	0		0	0	0		0	0	0
Tb427_000087600	1470	0	0	0		0	0	0		0	0	0
Tb427_000087700:pseudogene	816	0	0	0		0	0	0		0	0	0
Tb427_000087800	705	1	1	3		1.41844	1.41844	4.25532		0.0481117	0.0459596	0.136003
Tb427_000087900	513	0	0	0		0	0	0		0	0	0
Tb427_000088000:pseudogene	1380	0	0	0		0	0	0		0	0	0
Tb427_000088100:pseudogene	972	0	0	0		0	0	0		0	0	0
Tb427_000088200	525	0	0	0		0	0	0		0	0	0
Tb427_000088300	390	0	0	2		0	0	5.12821		0	0	0.163901
Tb427_000088400:pseudogene	1344	0	4	0		0	2.97619	0		0	0.0964331	0
Tb427_000088500	429	0	2	0		0	4.662	0		0	0.151056	0
Tb427_000088600	234	0	0	0		0	0	0		0	0	0
Tb427_000088700:pseudogene	3078	19	22	26		6.17284	7.1475	8.44704		0.209375	0.23159	0.269973
Tb427_000088800	414	0	0	0		0	0	0		0	0	0
Tb427_000088900:pseudogene	1473	0	0	0		0	0	0		0	0	0
Tb427_000089000:pseudogene	870	0	0	0		0	0	0		0	0	0
Tb427_000089100:pseudogene	1461	0	0	0		0	0	0		0	0	0
Tb427_000089200	1476	0	0	0		0	0	0		0	0	0
Tb427_000089300:pseudogene	1410	0	0	0		0	0	0		0	0	0
Tb427_000089400:pseudogene	807	0	0	0		0	0	0		0	0	0
Tb427_000089500:pseudogene	1482	2	0	0		1.34953	0	0		0.0457743	0	0
Tb427_000089600:pseudogene	1527	0	0	0		0	0	0		0	0	0
Tb427_000089700	1452	0	0	0		0	0	0		0	0	0
Tb427_000089800:pseudogene	1410	0	0	2		0	0	1.41844		0	0	0.0453342
Tb427_000089900:pseudogene	1332	0	0	0		0	0	0		0	0	0
Tb427_000090000	609	0	0	0		0	0	0		0	0	0
Tb427_000090100	849	0	0	0		0	0	0		0	0	0
Tb427_000090200	1503	0	0	0		0	0	0		0	0	0
Tb427_000090300	2526	8	3	9		3.16706	1.18765	3.56295		0.107423	0.0384816	0.113874
Tb427_000090400	1689	0	4	0		0	2.36827	0		0	0.0767354	0
Tb427_000090500:pseudogene	2496	0	0	1		0	0	0.400641		0	0	0.0128047
Tb427_000090600	1467	6	4	0		4.08998	2.72665	0		0.138727	0.0883477	0
Tb427_000090700:pseudogene	357	0	0	0		0	0	0		0	0	0
Tb427_000090800:pseudogene	1395	0	0	0		0	0	0		0	0	0
Tb427_000090900:pseudogene	1347	0	0	0		0	0	0		0	0	0
Tb427_000091000	936	0	0	0		0	0	0		0	0	0
Tb427_000091100:pseudogene	1362	0	0	0		0	0	0		0	0	0
Tb427_000091200	1188	0	0	0		0	0	0		0	0	0
Tb427_000091300:pseudogene	981	0	0	2		0	0	2.03874		0	0	0.0651593
Tb427_000091400:pseudogene	1419	2	2	0		1.40944	1.40944	0		0.0478065	0.0456681	0
Tb427_000091500	1491	0	0	0		0	0	0		0	0	0
Tb427_000091600:pseudogene	1452	0	0	2		0	0	1.37741		0	0	0.0440229
Tb427_000091700:pseudogene	1302	0	0	0		0	0	0		0	0	0
Tb427_000091800	513	15	0	2		29.2398	0	3.89864		0.991776	0	0.124603
Tb427_000091900	1578	14	2	4		8.87199	1.26743	2.53485		0.300927	0.0410665	0.0810156
Tb427_000092000	1314	0	2	0		0	1.52207	0		0	0.0493174	0
Tb427_000092100:pseudogene	1509	0	0	0		0	0	0		0	0	0
Tb427_000092200:pseudogene	1305	0	0	0		0	0	0		0	0	0
Tb427_000092300	1524	2	0	0		1.31234	0	0		0.0445128	0	0
Tb427_000092400	807	2	0	0		2.47831	0	0		0.0840613	0	0
Tb427_000092500	1059	3	2	2		2.83286	1.88857	1.88857		0.0960871	0.0611926	0.06036
Tb427_000092600	1047	2	0	2		1.91022	0	1.91022		0.0647923	0	0.0610518
Tb427_000092700	1572	3	2	0		1.9084	1.27226	0		0.0647304	0.0412233	0
Tb427_000092800:pseudogene	1473	0	0	0		0	0	0		0	0	0
Tb427_000092900	516	0	0	0		0	0	0		0	0	0
Tb427_000093000:pseudogene	867	0	0	0		0	0	0		0	0	0
Tb427_000093100	1080	0	0	0		0	0	0		0	0	0
Tb427_000093200:pseudogene	1518	0	0	0		0	0	0		0	0	0
Tb427_000093300	1617	6	0	0		3.71058	0	0		0.125858	0	0
Tb427_000093400:pseudogene	942	0	0	0		0	0	0		0	0	0
Tb427_000093500:pseudogene	1377	0	0	0		0	0	0		0	0	0
Tb427_000093600	714	0	0	0		0	0	0		0	0	0
Tb427_000093700	813	0	0	0		0	0	0		0	0	0
Tb427_000093800:pseudogene	1539	0	0	0		0	0	0		0	0	0
Tb427_000093900	1509	0	0	2		0	0	1.32538		0	0	0.04236
Tb427_000094000:pseudogene	873	0	0	0		0	0	0		0	0	0
Tb427_000094100:pseudogene	1473	0	0	2		0	0	1.35777		0	0	0.0433953
Tb427_000094200	513	0	0	0		0	0	0		0	0	0
Tb427_000094300	516	0	0	0		0	0	0		0	0	0
Tb427_000094400	558	0	0	0		0	0	0		0	0	0
Tb427_000094500	1503	0	0	0		0	0	0		0	0	0
Tb427_000094600	1509	0	0	0		0	0	0		0	0	0
Tb427_000094700:pseudogene	942	0	0	0		0	0	0		0	0	0
Tb427_000094800:pseudogene	1581	0	0	0		0	0	0		0	0	0
Tb427_000094900:pseudogene	1479	0	0	0		0	0	0		0	0	0
Tb427_000095000:pseudogene	1368	0	0	0		0	0	0		0	0	0
Tb427_000095100	1443	0	0	0		0	0	0		0	0	0
Tb427_000095200:pseudogene	1446	0	0	0		0	0	0		0	0	0
Tb427_000095300:pseudogene	1302	2	0	0		1.5361	0	0		0.0521025	0	0
Tb427_000095400	1518	0	0	0		0	0	0		0	0	0
Tb427_000095500:pseudogene	2496	11	9	11		4.40705	3.60577	4.40705		0.149482	0.116832	0.140852
Tb427_000095600	1365	0	0	0		0	0	0		0	0	0
Tb427_000095700	639	0	0	0		0	0	0		0	0	0
Tb427_000095800	504	0	0	0		0	0	0		0	0	0
Tb427_000095900:pseudogene	1644	0	0	0		0	0	0		0	0	0
Tb427_000096000	1452	0	0	0		0	0	0		0	0	0
Tb427_000096100	255	0	0	0		0	0	0		0	0	0
Tb427_000096200	1113	0	0	0		0	0	0		0	0	0
Tb427_000096300:pseudogene	1458	0	0	0		0	0	0		0	0	0
Tb427_000096400:pseudogene	999	0	0	0		0	0	0		0	0	0
Tb427_000096500:pseudogene	1518	0	0	0		0	0	0		0	0	0
Tb427_000096600:pseudogene	2493	0	1	4		0	0.401123	1.60449		0	0.012997	0.0512806
Tb427_000096700:pseudogene	1407	0	0	0		0	0	0		0	0	0
Tb427_000096800:pseudogene	1494	0	0	2		0	0	1.33869		0	0	0.0427853
Tb427_000096900:pseudogene	1272	0	0	0		0	0	0		0	0	0
Tb427_000097000:pseudogene	1461	0	0	0		0	0	0		0	0	0
Tb427_000097100:pseudogene	1404	0	0	0		0	0	0		0	0	0
Tb427_000097200:pseudogene	1374	0	0	0		0	0	0		0	0	0
Tb427_000097300:pseudogene	1368	1	0	0		0.730994	0	0		0.0247944	0	0
Tb427_000097400:pseudogene	1356	0	0	0		0	0	0		0	0	0
Tb427_000097500:pseudogene	867	0	0	2		0	0	2.30681		0	0	0.073727
Tb427_000097600:pseudogene	1248	0	0	0		0	0	0		0	0	0
Tb427_000097700	1536	0	0	0		0	0	0		0	0	0
Tb427_000097800	1335	0	0	0		0	0	0		0	0	0
Tb427_000097900:pseudogene	897	0	0	0		0	0	0		0	0	0
Tb427_000098000:pseudogene	1413	0	0	3		0	0	2.12314		0	0	0.067857
Tb427_000098100:pseudogene	1233	0	0	0		0	0	0		0	0	0
Tb427_000098200:pseudogene	1389	2	0	2		1.43988	0	1.43988		0.0488391	0	0.0460196
Tb427_000098300:pseudogene	1494	0	0	0		0	0	0		0	0	0
Tb427_000098400:pseudogene	1437	0	0	0		0	0	0		0	0	0
Tb427_000098500:pseudogene	465	0	0	0		0	0	0		0	0	0
Tb427_000098600:pseudogene	1041	0	0	0		0	0	0		0	0	0
Tb427_000098700	4950	52	52	56		10.5051	10.5051	11.3131		0.356318	0.340379	0.361575
Tb427_000098800:pseudogene	1350	0	0	0		0	0	0		0	0	0
Tb427_000098900:pseudogene	1434	0	0	0		0	0	0		0	0	0
Tb427_000099000	1713	3	3	8		1.75131	1.75131	4.67017		0.0594024	0.0567452	0.149262
Tb427_000099100:pseudogene	1287	0	0	0		0	0	0		0	0	0
Tb427_000099200:pseudogene	525	0	0	0		0	0	0		0	0	0
Tb427_000099300	936	0	0	1		0	0	1.06838		0	0	0.034146
Tb427_000099400:pseudogene	3060	8	0	5		2.61438	0	1.63399		0.0886765	0	0.0522233
Tb427_000099500:pseudogene	1287	0	0	0		0	0	0		0	0	0
Tb427_000099600:pseudogene	525	0	0	0		0	0	0		0	0	0
Tb427_000099700	936	0	0	0		0	0	0		0	0	0
Tb427_000099800:pseudogene	3066	22	8	16		7.17547	2.60926	5.21853		0.243383	0.084544	0.166787
Tb427_000099900:pseudogene	399	0	0	0		0	0	0		0	0	0
Tb427_000100000:pseudogene	1329	0	2	0		0	1.50489	0		0	0.0487607	0
Tb427_000100100:pseudogene	1494	0	0	0		0	0	0		0	0	0
Tb427_000100200:pseudogene	858	0	0	0		0	0	0		0	0	0
Tb427_000100300:pseudogene	1236	0	0	0		0	0	0		0	0	0
Tb427_000100400:pseudogene	1317	0	0	2		0	0	1.5186		0	0	0.0485355
Tb427_000100500:pseudogene	558	0	0	0		0	0	0		0	0	0
Tb427_000100600:pseudogene	1284	0	1	0		0	0.778816	0		0	0.0252348	0
Tb427_000100700	1170	0	0	0		0	0	0		0	0	0
Tb427_000100800	603	0	0	0		0	0	0		0	0	0
Tb427_000100900:pseudogene	1497	0	2	0		0	1.33601	0		0	0.0432886	0
Tb427_000101000:pseudogene	858	0	0	2		0	0	2.331		0	0	0.0745003
Tb427_000101100:pseudogene	1332	0	0	0		0	0	0		0	0	0
Tb427_000101200	1521	0	0	0		0	0	0		0	0	0
Tb427_000101300	798	0	0	0		0	0	0		0	0	0
Tb427_000101400:pseudogene	1338	0	0	0		0	0	0		0	0	0
Tb427_000101500:pseudogene	852	0	0	0		0	0	0		0	0	0
Tb427_000101600:pseudogene	1494	10	2	2		6.69344	1.33869	1.33869		0.227033	0.0433755	0.0427853
Tb427_000101700	1551	0	0	0		0	0	0		0	0	0
Tb427_000101800	561	0	0	0		0	0	0		0	0	0
Tb427_000101900:pseudogene	1314	0	0	0		0	0	0		0	0	0
Tb427_000102000:pseudogene	726	0	0	0		0	0	0		0	0	0
Tb427_000102100:pseudogene	1602	0	0	0		0	0	0		0	0	0
Tb427_000102200	210	0	0	0		0	0	0		0	0	0
Tb427_000102300	747	0	0	0		0	0	0		0	0	0
Tb427_000102400	1587	0	0	0		0	0	0		0	0	0
Tb427_000102500	1458	0	0	0		0	0	0		0	0	0
Tb427_000102600:pseudogene	1533	0	0	0		0	0	0		0	0	0
Tb427_000102700:pseudogene	843	0	1	0		0	1.18624	0		0	0.0384359	0
Tb427_000102800	315	0	0	0		0	0	0		0	0	0
Tb427_000102900:pseudogene	564	0	0	0		0	0	0		0	0	0
Tb427_000103000	1011	0	0	0		0	0	0		0	0	0
Tb427_000103100	1536	0	0	0		0	0	0		0	0	0
Tb427_000103200:pseudogene	1245	0	0	0		0	0	0		0	0	0
Tb427_000103300:pseudogene	1377	0	0	0		0	0	0		0	0	0
Tb427_000103400	1485	0	0	0		0	0	0		0	0	0
Tb427_000103500	366	0	0	0		0	0	0		0	0	0
Tb427_000103600	372	0	0	0		0	0	0		0	0	0
Tb427_000103700:pseudogene	1356	0	0	0		0	0	0		0	0	0
Tb427_000103800	1461	0	0	0		0	0	0		0	0	0
Tb427_000103900:pseudogene	1479	0	0	0		0	0	0		0	0	0
Tb427_000104000	597	0	0	0		0	0	0		0	0	0
Tb427_000104100:pseudogene	888	0	0	0		0	0	0		0	0	0
Tb427_000104200	1497	0	0	0		0	0	0		0	0	0
Tb427_000104300	867	0	0	0		0	0	0		0	0	0
Tb427_000104400:pseudogene	1464	0	0	0		0	0	0		0	0	0
Tb427_000104500:pseudogene	1485	0	0	0		0	0	0		0	0	0
Tb427_000104600	1431	0	0	0		0	0	0		0	0	0
Tb427_000104700:pseudogene	858	0	0	0		0	0	0		0	0	0
Tb427_000104800	1488	0	0	0		0	0	0		0	0	0
Tb427_000104900:pseudogene	567	0	0	0		0	0	0		0	0	0
Tb427_000105000	891	4	2	4		4.48934	2.24467	4.48934		0.152273	0.0727307	0.143482
Tb427_000105100	963	2	2	5		2.07684	2.07684	5.19211		0.0704439	0.0672928	0.165943
Tb427_000105200	891	2	6	4		2.24467	6.73401	4.48934		0.0761363	0.218192	0.143482
Tb427_000105300	1050	2	0	3		1.90476	0	2.85714		0.0646071	0	0.0913161
Tb427_000105400	2367	7	6	13		2.95733	2.53485	5.49218		0.100309	0.0821331	0.175534
Tb427_000105500	891	8	10	2		8.97868	11.2233	2.24467		0.304545	0.363653	0.0717411
Tb427_000105600	972	2	2	4		2.05761	2.05761	4.11523		0.0697917	0.0666698	0.131525
Tb427_000105700	951	0	2	0		0	2.10305	0		0	0.068142	0
Tb427_000105800:pseudogene	1446	0	0	0		0	0	0		0	0	0
Tb427_000105900:pseudogene	969	0	0	0		0	0	0		0	0	0
Tb427_000106000	1449	0	0	0		0	0	0		0	0	0
Tb427_000106100:pseudogene	1557	0	0	0		0	0	0		0	0	0
Tb427_000106200:pseudogene	1389	0	0	0		0	0	0		0	0	0
Tb427_000106300	1104	2	0	0		1.81159	0	0		0.061447	0	0
Tb427_000106400	1554	0	0	0		0	0	0		0	0	0
Tb427_000106500:pseudogene	1458	0	0	0		0	0	0		0	0	0
Tb427_000106600	1551	601	884	669		387.492	569.955	431.335		13.1432	18.4674	13.7857
Tb427_000106700	609	18	14	10		29.5567	22.9885	16.4204		1.00252	0.744862	0.524805
Tb427_000106800	666	91	70	79		136.637	105.105	118.619		4.63454	3.40556	3.79113
Tb427_000106900	453	108	119	98		238.411	262.693	216.336		8.08659	8.51165	6.91422
Tb427_000107000	504	90	63	81		178.571	125	160.714		6.05692	4.05019	5.13653
Tb427_000107100:pseudogene	984	229	187	198		232.724	190.041	201.22		7.89369	6.1576	6.4311
Tb427_000107200	618	207	184	84		334.951	297.735	135.922		11.3611	9.64705	4.34417
Tb427_000107300:pseudogene	945	1083	1145	921		1146.03	1211.64	974.603		38.872	39.259	31.1489
Tb427_000107400	531	389	363	332		732.58	683.616	625.235		24.8482	22.1502	19.9829
Tb427_000107500:pseudogene	987	896	623	500		907.801	631.206	506.586		30.7915	20.452	16.1908
Tb427_000107600:pseudogene	462	322	369	349		696.97	798.701	755.411		23.6403	25.8791	24.1434
Tb427_000107700:pseudogene	660	798	727	692		1209.09	1101.52	1048.48		41.0108	35.6907	33.5102
Tb427_000107800	894	880	959	935		984.34	1072.71	1045.86		33.3876	34.7573	33.4264
Tb427_000107900	300	234	261	200		780	870	666.667		26.4566	28.1893	21.3071
Tb427_000108000:pseudogene	534	135	130	120		252.809	243.446	224.719		8.57496	7.88801	7.18217
Tb427_000108100	462	76	107	123		164.502	231.602	266.234		5.57971	7.50424	8.509
Tb427_000108200:pseudogene	651	7	17	13		10.7527	26.1137	19.9693		0.364718	0.846122	0.638231
Tb427_000108300	1305	290	367	105		222.222	281.226	80.4598		7.5375	9.11215	2.57155
Tb427_000108400:pseudogene	918	338	303	203		368.192	330.065	221.133		12.4886	10.6946	7.06755
Tb427_000108500	771	374	476	360		485.084	617.38	466.926		16.4535	20.004	14.9233
Tb427_000108600	975	182	126	109		186.667	129.231	111.795		6.3315	4.18727	3.57304
Tb427_000108700	663	92	89	97		138.763	134.238	146.305		4.70667	4.34952	4.67599
Tb427_000108800:pseudogene	483	122	124	84		252.588	256.729	173.913		8.56747	8.3184	5.55837
Tb427_000108900:pseudogene	1329	228	207	189		171.558	155.756	142.212		5.81902	5.04674	4.54519
Tb427_000109000	885	1729	1606	1573		1953.67	1814.69	1777.4		66.2661	58.7987	56.8069
Tb427_000109100	975	1478	1531	1235		1515.9	1570.26	1266.67		51.4173	50.8787	40.4835
Tb427_000109200:pseudogene	489	388	373	391		793.456	762.781	799.591		26.913	24.7153	25.5554
Tb427_000109300:pseudogene	672	741	690	666		1102.68	1026.79	991.071		37.4015	33.2694	31.6753
Tb427_000109400	852	321	340	334		376.761	399.061	392.019		12.7792	12.9302	12.5292
Tb427_000109500	450	174	184	135		386.667	408.889	300		13.1152	13.2486	9.58819
Tb427_000109600	4974	741	569	626		148.975	114.395	125.854		5.05303	3.70657	4.02239
Tb427_000109700	327	27	16	20		82.5688	48.9297	61.1621		2.80063	1.58539	1.95478
Tb427_000109800	321	94	134	149		292.835	417.445	464.174		9.93259	13.5259	14.8353
Tb427_000109900:pseudogene	456	103	153	144		225.877	335.526	315.789		7.66147	10.8716	10.0928
Tb427_000110000:pseudogene	651	40	72	62		61.4439	110.599	95.2381		2.0841	3.58358	3.04387
Tb427_000110100	5130	492	448	533		95.9064	87.3294	103.899		3.25303	2.82961	3.32067
Tb427_000110200	4974	265	242	265		53.277	48.653	53.277		1.80709	1.57643	1.70277
Tb427_000110300	1694	681	714	667		402.007	421.488	393.743		13.6356	13.6568	12.5843
Tb427_000110400	450	0	0	0		0	0	0		0	0	0
Tb427_000110500:pseudogene	2427	2	0	4		0.824063	0	1.64813		0.0279512	0	0.0526751
Tb427_000110600	264	0	0	0		0	0	0		0	0	0
Tb427_000110700:pseudogene	963	0	0	0		0	0	0		0	0	0
Tb427_000110800	864	0	0	1		0	0	1.15741		0	0	0.0369915
Tb427_000110900	1512	0	0	0		0	0	0		0	0	0
Tb427_000111000:pseudogene	1497	2	0	0		1.33601	0	0		0.0453156	0	0
Tb427_000111100:pseudogene	1377	2	0	0		1.45243	0	0		0.0492647	0	0
Tb427_000111200:pseudogene	2427	3	0	2		1.23609	0	0.824063		0.0419268	0	0.0263376
Tb427_000111300:pseudogene	627	2	3	5		3.18979	4.78469	7.97448		0.108194	0.155031	0.25487
Tb427_000111400:pseudogene	675	114	150	121		168.889	222.222	179.259		5.7285	7.20033	5.72924
Tb427_000111500:pseudogene	456	0	0	2		0	0	4.38596		0	0	0.140178
Tb427_000111600	441	0	0	0		0	0	0		0	0	0
Tb427_000111700	678	0	2	0		0	2.94985	0		0	0.0955797	0
Tb427_000111800	1272	0	0	2		0	0	1.57233		0	0	0.0502526
Tb427_000111900:pseudogene	1581	0	0	0		0	0	0		0	0	0
Tb427_000112000	3864	14	3	4		3.62319	0.776398	1.0352		0.122894	0.0251564	0.0330856
Tb427_000112100	438	14	6	15		31.9635	13.6986	34.2466		1.08416	0.443856	1.09454
Tb427_000112200:pseudogene	1398	0	0	0		0	0	0		0	0	0
Tb427_000112300:pseudogene	1509	0	0	0		0	0	0		0	0	0
Tb427_000112400:pseudogene	1527	0	0	0		0	0	0		0	0	0
Tb427_000112500:pseudogene	1440	0	0	0		0	0	0		0	0	0
Tb427_000112600:pseudogene	657	0	0	0		0	0	0		0	0	0
Tb427_000112700:pseudogene	1236	0	0	0		0	0	0		0	0	0
Tb427_000112800	753	0	0	0		0	0	0		0	0	0
Tb427_000112900	696	0	0	0		0	0	0		0	0	0
Tb427_000113000:pseudogene	1560	0	0	0		0	0	0		0	0	0
Tb427_000113100:pseudogene	1491	12	15	9		8.04829	10.0604	6.03622		0.272988	0.325971	0.192921
Tb427_000113200:pseudogene	1317	1	0	0		0.759301	0	0		0.0257546	0	0
Tb427_000113300:pseudogene	789	0	0	0		0	0	0		0	0	0
Tb427_000113400:pseudogene	1446	0	0	0		0	0	0		0	0	0
Tb427_000113500	645	0	0	0		0	0	0		0	0	0
Tb427_000113600	531	1	0	0		1.88324	0	0		0.0638771	0	0
Tb427_000113700:pseudogene	1491	0	0	0		0	0	0		0	0	0
Tb427_000113800:pseudogene	1371	0	0	0		0	0	0		0	0	0
Tb427_000113900	546	0	0	0		0	0	0		0	0	0
Tb427_000114000	1539	0	0	0		0	0	0		0	0	0
Tb427_000114100:pseudogene	798	0	0	0		0	0	0		0	0	0
Tb427_000114200:pseudogene	996	0	0	0		0	0	0		0	0	0
Tb427_000114300:pseudogene	1554	2	4	0		1.287	2.574	0		0.0436535	0.0834016	0
Tb427_000114400:pseudogene	360	0	0	0		0	0	0		0	0	0
Tb427_000114500	1566	0	0	0		0	0	0		0	0	0
Tb427_000114600:pseudogene	1485	0	0	0		0	0	0		0	0	0
Tb427_000114700:pseudogene	1494	4	12	17		2.67738	8.03213	11.3788		0.0908132	0.260253	0.363675
Tb427_000114800:pseudogene	1380	0	0	0		0	0	0		0	0	0
Tb427_000114900	1377	0	0	0		0	0	0		0	0	0
Tb427_000115000:pseudogene	1485	0	0	0		0	0	0		0	0	0
Tb427_000115100:pseudogene	921	0	0	0		0	0	0		0	0	0
Tb427_000115200:pseudogene	1293	0	0	2		0	0	1.54679		0	0	0.0494364
Tb427_000115300	1458	0	2	0		0	1.37174	0		0	0.0444465	0
Tb427_000115400	768	2	10	10		2.60417	13.0208	13.0208		0.0883301	0.421895	0.416154
Tb427_000115500	1290	7	4	6		5.42636	3.10078	4.65116		0.184055	0.10047	0.148654
Tb427_000115600	2124	11	20	10		5.17891	9.4162	4.7081		0.175662	0.305099	0.150474
Tb427_000115700:pseudogene	900	0	0	0		0	0	0		0	0	0
Tb427_000115800:pseudogene	1494	0	0	0		0	0	0		0	0	0
Tb427_000115900:pseudogene	1386	0	0	0		0	0	0		0	0	0
Tb427_000116000:pseudogene	987	0	1	2		0	1.01317	2.02634		0	0.0328283	0.0647632
Tb427_000116100:pseudogene	1380	0	0	0		0	0	0		0	0	0
Tb427_000116200:pseudogene	1635	0	0	0		0	0	0		0	0	0
Tb427_000116300:pseudogene	1827	0	0	0		0	0	0		0	0	0
Tb427_000116400:pseudogene	657	1	0	0		1.52207	0	0		0.0516267	0	0
Tb427_000116500:pseudogene	1494	0	0	0		0	0	0		0	0	0
Tb427_000116600:pseudogene	1536	0	0	0		0	0	0		0	0	0
Tb427_000116700:pseudogene	1224	0	0	0		0	0	0		0	0	0
Tb427_000116800:pseudogene	867	0	0	0		0	0	0		0	0	0
Tb427_000116900:pseudogene	1425	0	0	0		0	0	0		0	0	0
Tb427_000117000:pseudogene	1482	0	0	0		0	0	0		0	0	0
Tb427_000117100:pseudogene	1449	0	0	0		0	0	0		0	0	0
Tb427_000117200:pseudogene	1389	2	0	0		1.43988	0	0		0.0488391	0	0
Tb427_000117300	990	0	0	0		0	0	0		0	0	0
Tb427_000117400	1416	0	0	0		0	0	0		0	0	0
Tb427_000117500	768	0	0	0		0	0	0		0	0	0
Tb427_000117600:pseudogene	471	0	0	0		0	0	0		0	0	0
Tb427_000117700:pseudogene	1458	0	0	0		0	0	0		0	0	0
Tb427_000117800	72	0	0	0		0	0	0		0	0	0
Tb427_000117900:pseudogene	1179	0	0	0		0	0	0		0	0	0
Tb427_000118000:pseudogene	495	0	0	0		0	0	0		0	0	0
Tb427_000118100:pseudogene	1494	9	2	9		6.0241	1.33869	6.0241		0.20433	0.0433755	0.192534
Tb427_000118200:pseudogene	1464	0	0	2		0	0	1.36612		0	0	0.0436621
Tb427_000118300:pseudogene	900	0	0	1		0	0	1.11111		0	0	0.0355118
Tb427_000118400:pseudogene	1278	0	0	0		0	0	0		0	0	0
Tb427_000118500:pseudogene	843	0	0	0		0	0	0		0	0	0
Tb427_000118600:pseudogene	924	0	0	0		0	0	0		0	0	0
Tb427_000118700	810	0	0	0		0	0	0		0	0	0
Tb427_000118800:pseudogene	378	0	0	0		0	0	0		0	0	0
Tb427_000118900	813	0	0	0		0	0	0		0	0	0
Tb427_000119000	681	0	0	0		0	0	0		0	0	0
Tb427_000119100	426	0	0	0		0	0	0		0	0	0
Tb427_000119200	1455	2	2	0		1.37457	1.37457	0		0.0466237	0.0445382	0
Tb427_000119300:pseudogene	426	0	0	0		0	0	0		0	0	0
Tb427_000119400:pseudogene	1503	0	0	0		0	0	0		0	0	0
Tb427_000119500:pseudogene	870	0	0	0		0	0	0		0	0	0
Tb427_000119600:pseudogene	1419	0	0	2		0	0	1.40944		0	0	0.0450467
Tb427_000119700:pseudogene	342	0	0	0		0	0	0		0	0	0
Tb427_000119800	1080	0	0	0		0	0	0		0	0	0
Tb427_000119900:pseudogene	1458	0	0	2		0	0	1.37174		0	0	0.0438418
Tb427_000120000:pseudogene	867	0	0	0		0	0	0		0	0	0
Tb427_000120100	414	0	0	0		0	0	0		0	0	0
Tb427_000120200:pseudogene	1548	0	0	0		0	0	0		0	0	0
Tb427_000120300	1521	4	2	2		2.62985	1.31492	1.31492		0.0892012	0.0426055	0.0420258
Tb427_000120400	2334	2	5	3		0.856898	2.14225	1.28535		0.0290649	0.069412	0.0410805
Tb427_000120500:pseudogene	567	0	0	0		0	0	0		0	0	0
Tb427_000120600:pseudogene	942	0	0	0		0	0	0		0	0	0
Tb427_000120700	921	0	0	0		0	0	0		0	0	0
Tb427_000120800:pseudogene	369	0	0	0		0	0	0		0	0	0
Tb427_000120900	1479	0	0	0		0	0	0		0	0	0
Tb427_000121000	357	0	0	0		0	0	0		0	0	0
Tb427_000121100	1395	0	0	0		0	0	0		0	0	0
Tb427_000121200:pseudogene	885	0	0	0		0	0	0		0	0	0
Tb427_000121300	1476	0	0	0		0	0	0		0	0	0
Tb427_000121400:pseudogene	1290	0	0	0		0	0	0		0	0	0
Tb427_000121500:pseudogene	1152	0	0	0		0	0	0		0	0	0
Tb427_000121600	705	0	0	0		0	0	0		0	0	0
Tb427_000121700	720	0	0	0		0	0	0		0	0	0
Tb427_000121800:pseudogene	1347	0	0	0		0	0	0		0	0	0
Tb427_000121900	1587	0	6	4		0	3.78072	2.52048		0	0.122501	0.0805561
Tb427_000122000:pseudogene	1461	2	4	0		1.36893	2.73785	0		0.0464322	0.0887105	0
Tb427_000122100:pseudogene	1485	0	6	4		0	4.0404	2.6936		0	0.130915	0.0860893
Tb427_000122200	555	0	0	0		0	0	0		0	0	0
Tb427_000122300:pseudogene	1473	3	2	2		2.03666	1.35777	1.35777		0.0690809	0.0439939	0.0433953
Tb427_000122400:pseudogene	1335	0	0	0		0	0	0		0	0	0
Tb427_000122500:pseudogene	867	0	0	2		0	0	2.30681		0	0	0.073727
Tb427_000122600:pseudogene	1380	0	0	0		0	0	0		0	0	0
Tb427_000122700:pseudogene	1494	12	6	6		8.03213	4.01606	4.01606		0.27244	0.130127	0.128356
Tb427_000122800:pseudogene	894	0	0	0		0	0	0		0	0	0
Tb427_000122900:pseudogene	654	0	0	0		0	0	0		0	0	0
Tb427_000123000:pseudogene	834	0	0	0		0	0	0		0	0	0
Tb427_000123100	1512	0	0	2		0	0	1.32275		0	0	0.042276
Tb427_000123200	1023	0	0	0		0	0	0		0	0	0
Tb427_000123300	336	0	0	0		0	0	0		0	0	0
Tb427_000123400:pseudogene	879	0	0	0		0	0	0		0	0	0
Tb427_000123500:pseudogene	870	0	0	0		0	0	0		0	0	0
Tb427_000123600:pseudogene	663	0	0	0		0	0	0		0	0	0
Tb427_000123700:pseudogene	2559	0	0	0		0	0	0		0	0	0
Tb427_000123800:pseudogene	1884	5	2	3		2.65393	1.06157	1.59236		0.0900179	0.0343965	0.0508927
Tb427_000123900:pseudogene	1494	3	4	4		2.00803	2.67738	2.67738		0.0681099	0.086751	0.0855707
Tb427_000124000:pseudogene	663	0	0	0		0	0	0		0	0	0
Tb427_000124100:pseudogene	1374	0	0	0		0	0	0		0	0	0
Tb427_000124200:pseudogene	1401	0	0	0		0	0	0		0	0	0
Tb427_000124300:pseudogene	996	0	2	0		0	2.00803	0		0	0.0650633	0
Tb427_000124400:pseudogene	1380	0	0	0		0	0	0		0	0	0
Tb427_000124500	459	0	0	0		0	0	0		0	0	0
Tb427_000124600:pseudogene	1464	0	0	4		0	0	2.73224		0	0	0.0873242
Tb427_000124700	387	0	0	0		0	0	0		0	0	0
Tb427_000124800	231	0	0	0		0	0	0		0	0	0
Tb427_000124900	1419	0	0	0		0	0	0		0	0	0
Tb427_000125000	189	0	0	0		0	0	0		0	0	0
Tb427_000125100	738	0	0	0		0	0	0		0	0	0
Tb427_000125200:pseudogene	2496	9	4	5		3.60577	1.60256	2.00321		0.122303	0.0519255	0.0640237
Tb427_000125300:pseudogene	1404	0	0	0		0	0	0		0	0	0
Tb427_000125400:pseudogene	1482	2	0	0		1.34953	0	0		0.0457743	0	0
Tb427_000125500	1287	0	2	0		0	1.554	0		0	0.050352	0
Tb427_000125600:pseudogene	924	0	0	0		0	0	0		0	0	0
Tb427_000125700:pseudogene	1377	0	0	0		0	0	0		0	0	0
Tb427_000125800:pseudogene	387	0	0	0		0	0	0		0	0	0
Tb427_000125900	693	0	0	0		0	0	0		0	0	0
Tb427_000126000:pseudogene	882	0	0	0		0	0	0		0	0	0
Tb427_000126100:pseudogene	1161	0	0	2		0	0	1.72265		0	0	0.0550571
Tb427_000126200	1398	6	2	4		4.29185	1.43062	2.86123		0.145574	0.0463541	0.0914468
Tb427_000126300:pseudogene	996	0	2	0		0	2.00803	0		0	0.0650633	0
Tb427_000126400:pseudogene	1485	0	0	0		0	0	0		0	0	0
Tb427_000126500	414	2	1	0		4.83092	2.41546	0		0.163859	0.0782645	0
Tb427_000126600	531	0	0	0		0	0	0		0	0	0
Tb427_000126700	1407	0	0	0		0	0	0		0	0	0
Tb427_000126800:pseudogene	861	0	0	0		0	0	0		0	0	0
Tb427_000126900:pseudogene	453	0	0	0		0	0	0		0	0	0
Tb427_000127000:pseudogene	336	0	0	0		0	0	0		0	0	0
Tb427_000127100:pseudogene	309	0	0	0		0	0	0		0	0	0
Tb427_000127200:pseudogene	600	0	0	0		0	0	0		0	0	0
Tb427_000127300	363	2	1	0		5.50964	2.75482	0		0.18688	0.0892603	0
Tb427_000127400	621	0	0	0		0	0	0		0	0	0
Tb427_000127500	372	25	35	24		67.2043	94.086	64.5161		2.27949	3.04853	2.06198
Tb427_000127600:pseudogene	351	0	0	0		0	0	0		0	0	0
Tb427_000127700:pseudogene	1236	0	0	0		0	0	0		0	0	0
Tb427_000127800	450	2	2	0		4.44444	4.44444	0		0.15075	0.144007	0
Tb427_000127900	573	0	0	0		0	0	0		0	0	0
Tb427_000128000:pseudogene	1344	0	2	0		0	1.4881	0		0	0.0482165	0
Tb427_000128100:pseudogene	1494	0	0	0		0	0	0		0	0	0
Tb427_000128200:pseudogene	858	8	2	0		9.32401	2.331	0		0.316259	0.075528	0
Tb427_000128300:pseudogene	1503	0	0	0		0	0	0		0	0	0
Tb427_000128400	1464	0	0	0		0	0	0		0	0	0
Tb427_000128500:pseudogene	564	2	2	3		3.5461	3.5461	5.31915		0.120279	0.114899	0.170003
Tb427_000128600:pseudogene	1284	0	1	2		0	0.778816	1.55763		0	0.0252348	0.0497829
Tb427_000128700	939	5	2	4		5.32481	2.12993	4.25985		0.180611	0.0690128	0.136148
Tb427_000128800	978	2	0	6		2.04499	0	6.13497		0.0693635	0	0.196078
Tb427_000128900	810	0	0	0		0	0	0		0	0	0
Tb427_000129000	1455	0	2	0		0	1.37457	0		0	0.0445382	0
Tb427_000129100:pseudogene	1410	10	2	0		7.0922	1.41844	0		0.240558	0.0459596	0
Tb427_000129200	537	8	0	0		14.8976	0	0		0.505307	0	0
Tb427_000129300:pseudogene	1419	4	0	0		2.81889	0	0		0.0956131	0	0
Tb427_000129400:pseudogene	879	4	0	0		4.55063	0	0		0.154352	0	0
Tb427_000129500	801	4	0	0		4.99376	0	0		0.169382	0	0
Tb427_000129600:pseudogene	1410	6	0	0		4.25532	0	0		0.144335	0	0
Tb427_000129700:pseudogene	1509	22	0	2		14.5792	0	1.32538		0.494508	0	0.04236
Tb427_000129800:pseudogene	1149	27	0	2		23.4987	0	1.74064		0.797046	0	0.0556321
Tb427_000129900:pseudogene	1389	4	0	0		2.87977	0	0		0.0976782	0	0
Tb427_000130000:pseudogene	885	3	0	0		3.38983	0	0		0.114979	0	0
Tb427_000130100:pseudogene	1536	34	0	0		22.1354	0	0		0.750806	0	0
Tb427_000130200:pseudogene	1488	45	0	0		30.2419	0	0		1.02577	0	0
Tb427_000130300	915	0	0	0		0	0	0		0	0	0
Tb427_000130400:pseudogene	837	0	0	0		0	0	0		0	0	0
Tb427_000130500	288	0	0	0		0	0	0		0	0	0
Tb427_000130600	729	0	0	0		0	0	0		0	0	0
Tb427_000130700:pseudogene	876	0	0	0		0	0	0		0	0	0
Tb427_000130800	1155	3	0	2		2.5974	0	1.7316		0.0881006	0	0.0553431
Tb427_000130900	1527	2	0	0		1.30976	0	0		0.0444253	0	0
Tb427_000131000	777	0	0	0		0	0	0		0	0	0
Tb427_000131100	945	0	0	0		0	0	0		0	0	0
Tb427_000131200	1473	0	0	0		0	0	0		0	0	0
Tb427_000131300	981	0	0	0		0	0	0		0	0	0
Tb427_000131400	4764	26	12	22		5.4576	2.51889	4.61797		0.185115	0.0816159	0.147593
Tb427_000131500:pseudogene	1368	2	0	0		1.46199	0	0		0.0495888	0	0
Tb427_000131600:pseudogene	1413	0	0	0		0	0	0		0	0	0
Tb427_000131700:pseudogene	1278	0	0	0		0	0	0		0	0	0
Tb427_000131800	654	0	0	0		0	0	0		0	0	0
Tb427_000131900	4611	36	22	19		7.80742	4.7712	4.12058		0.264818	0.154594	0.131696
Tb427_000132000:pseudogene	1320	0	0	0		0	0	0		0	0	0
Tb427_000132100:pseudogene	747	0	0	2		0	0	2.67738		0	0	0.0855707
Tb427_000132200	669	0	0	2		0	0	2.98954		0	0	0.0955475
Tb427_000132300	2697	14	29	16		5.19095	10.7527	5.93252		0.176071	0.348403	0.189607
Tb427_000132400	1050	0	8	0		0	7.61905	0		0	0.246869	0
Tb427_000132500	600	6	2	4		10	3.33333	6.66667		0.339187	0.108005	0.213071
Tb427_000132600:pseudogene	396	0	0	0		0	0	0		0	0	0
Tb427_000132700	852	2	0	0		2.34742	0	0		0.0796215	0	0
Tb427_000132800	483	0	0	0		0	0	0		0	0	0
Tb427_000132900	1455	4	0	0		2.74914	0	0		0.0932474	0	0
Tb427_000133000:pseudogene	1719	0	0	0		0	0	0		0	0	0
Tb427_000133100:pseudogene	834	0	0	0		0	0	0		0	0	0
Tb427_000133200	462	0	0	0		0	0	0		0	0	0
Tb427_000133300	1113	0	0	0		0	0	0		0	0	0
Tb427_000133400:pseudogene	1401	0	0	0		0	0	0		0	0	0
Tb427_000133500:pseudogene	1557	0	0	0		0	0	0		0	0	0
Tb427_000133600:pseudogene	840	0	0	0		0	0	0		0	0	0
Tb427_000133700	981	0	0	0		0	0	0		0	0	0
Tb427_000133800:pseudogene	1305	0	0	0		0	0	0		0	0	0
Tb427_000133900:pseudogene	552	0	1	0		0	1.81159	0		0	0.0586984	0
Tb427_000134000	1584	0	0	0		0	0	0		0	0	0
Tb427_000134100:pseudogene	1371	0	0	0		0	0	0		0	0	0
Tb427_000134200	897	8	6	4		8.91862	6.68896	4.45931		0.302508	0.216732	0.142522
Tb427_000134300:pseudogene	1227	0	0	0		0	0	0		0	0	0
Tb427_000134400:pseudogene	807	0	0	0		0	0	0		0	0	0
Tb427_000134500:pseudogene	1509	0	0	0		0	0	0		0	0	0
Tb427_000134600:pseudogene	843	0	0	0		0	0	0		0	0	0
Tb427_000134700:pseudogene	1374	0	0	0		0	0	0		0	0	0
Tb427_000134800	3486	27	19	35		7.74527	5.45037	10.0402		0.26271	0.1766	0.32089
Tb427_000134900	1845	0	2	0		0	1.08401	0		0	0.0351236	0
Tb427_000135000	813	2	2	2		2.46002	2.46002	2.46002		0.0834409	0.0797085	0.078624
Tb427_000135100	255	0	0	0		0	0	0		0	0	0
Tb427_000135200:pseudogene	1254	0	0	0		0	0	0		0	0	0
Tb427_000135300:pseudogene	1518	1	0	0		0.658762	0	0		0.0223444	0	0
Tb427_000135400:pseudogene	1443	0	0	0		0	0	0		0	0	0
Tb427_000135500	255	4	2	0		15.6863	7.84314	0		0.532059	0.254129	0
Tb427_000135600	813	2	0	4		2.46002	0	4.92005		0.0834409	0	0.157248
Tb427_000135700	1032	3	0	0		2.90698	0	0		0.098601	0	0
Tb427_000135800	1176	0	4	6		0	3.40136	5.10204		0	0.110209	0.163065
Tb427_000135900:pseudogene	915	0	0	0		0	0	0		0	0	0
Tb427_000136000	1206	4	2	2		3.31675	1.65837	1.65837		0.1125	0.0537338	0.0530027
Tb427_000136100	411	0	0	0		0	0	0		0	0	0
Tb427_000136200	438	0	0	0		0	0	0		0	0	0
Tb427_000136300:pseudogene	1083	0	2	0		0	1.84672	0		0	0.0598366	0
Tb427_000136400:pseudogene	1344	0	0	0		0	0	0		0	0	0
Tb427_000136500:pseudogene	1452	0	0	0		0	0	0		0	0	0
Tb427_000136600	1590	0	0	0		0	0	0		0	0	0
Tb427_000136700	1311	0	0	0		0	0	0		0	0	0
Tb427_000136800:pseudogene	1212	0	0	0		0	0	0		0	0	0
Tb427_000136900:pseudogene	405	0	0	0		0	0	0		0	0	0
Tb427_000137000	657	0	0	0		0	0	0		0	0	0
Tb427_000137100:pseudogene	879	0	0	0		0	0	0		0	0	0
Tb427_000137200:pseudogene	1455	0	0	0		0	0	0		0	0	0
Tb427_000137300	804	0	0	0		0	0	0		0	0	0
Tb427_000137400:pseudogene	843	0	0	0		0	0	0		0	0	0
Tb427_000137500	1521	0	0	0		0	0	0		0	0	0
Tb427_000137600:pseudogene	840	0	0	0		0	0	0		0	0	0
Tb427_000137700:pseudogene	1494	4	0	0		2.67738	0	0		0.0908132	0	0
Tb427_000137800	576	0	0	0		0	0	0		0	0	0
Tb427_000137900:pseudogene	513	0	0	0		0	0	0		0	0	0
Tb427_000138000:pseudogene	1287	0	0	0		0	0	0		0	0	0
Tb427_000138100:pseudogene	1374	1	0	0		0.727802	0	0		0.0246861	0	0
Tb427_000138200:pseudogene	792	0	0	0		0	0	0		0	0	0
Tb427_000138300:pseudogene	1464	0	0	0		0	0	0		0	0	0
Tb427_000138400	1575	0	0	0		0	0	0		0	0	0
Tb427_000138500:pseudogene	567	0	0	0		0	0	0		0	0	0
Tb427_000138600	1467	1	0	6		0.681663	0	4.08998		0.0231212	0	0.130718
Tb427_000138700:pseudogene	1500	2	2	0		1.33333	1.33333	0		0.045225	0.043202	0
Tb427_000138800:pseudogene	1488	0	0	0		0	0	0		0	0	0
Tb427_000138900:pseudogene	1602	0	0	0		0	0	0		0	0	0
Tb427_000139000	1461	0	0	0		0	0	0		0	0	0
Tb427_000139100:pseudogene	1359	0	0	0		0	0	0		0	0	0
Tb427_000139200	1590	6	5	6		3.77358	3.14465	3.77358		0.127995	0.101892	0.120606
Tb427_000139300	576	6	0	5		10.4167	0	8.68056		0.35332	0	0.277436
Tb427_000139400	1677	0	2	2		0	1.19261	1.19261		0	0.0386422	0.0381164
Tb427_000139500	1413	0	0	0		0	0	0		0	0	0
Tb427_000139600:pseudogene	1284	0	0	0		0	0	0		0	0	0
Tb427_000139700:pseudogene	1404	0	0	0		0	0	0		0	0	0
Tb427_000139800	522	0	0	0		0	0	0		0	0	0
Tb427_000139900	270	0	0	0		0	0	0		0	0	0
Tb427_000140000:pseudogene	909	1	0	3		1.10011	0	3.30033		0.0373143	0	0.105481
Tb427_000140100	786	0	0	0		0	0	0		0	0	0
Tb427_000140200	411	0	0	0		0	0	0		0	0	0
Tb427_000140300	738	0	0	0		0	0	0		0	0	0
Tb427_000140400:pseudogene	726	2	0	0		2.75482	0	0		0.0934401	0	0
Tb427_000140500	384	5	2	6		13.0208	5.20833	15.625		0.44165	0.168758	0.499385
Tb427_000140600	534	0	0	0		0	0	0		0	0	0
Tb427_000140700:pseudogene	1347	0	0	0		0	0	0		0	0	0
Tb427_000140800	459	0	0	0		0	0	0		0	0	0
Tb427_000140900:pseudogene	1527	0	0	0		0	0	0		0	0	0
Tb427_000141000:pseudogene	1431	0	0	0		0	0	0		0	0	0
Tb427_000141100:pseudogene	1395	0	0	0		0	0	0		0	0	0
Tb427_000141200	591	0	0	0		0	0	0		0	0	0
Tb427_000141300	1725	0	0	0		0	0	0		0	0	0
Tb427_000141400	1539	0	0	0		0	0	0		0	0	0
Tb427_000141500	1389	0	0	0		0	0	0		0	0	0
Tb427_000141600:pseudogene	846	0	0	0		0	0	0		0	0	0
Tb427_000141700	423	0	0	0		0	0	0		0	0	0
Tb427_000141800:pseudogene	1206	0	0	0		0	0	0		0	0	0
Tb427_000141900:pseudogene	960	3	3	2		3.125	3.125	2.08333		0.105996	0.101255	0.0665847
Tb427_000142000	441	0	0	0		0	0	0		0	0	0
Tb427_000142100:pseudogene	2493	2	7	11		0.802246	2.80786	4.41235		0.0272112	0.090979	0.141022
Tb427_000142200:pseudogene	1623	0	0	0		0	0	0		0	0	0
Tb427_000142300:pseudogene	1425	0	0	0		0	0	0		0	0	0
Tb427_000142400:pseudogene	1275	0	0	0		0	0	0		0	0	0
Tb427_000142500	981	0	0	0		0	0	0		0	0	0
Tb427_000142600	1068	0	0	0		0	0	0		0	0	0
Tb427_000142700:pseudogene	1356	0	0	0		0	0	0		0	0	0
Tb427_000142800:pseudogene	921	0	0	0		0	0	0		0	0	0
Tb427_000142900:pseudogene	669	0	0	0		0	0	0		0	0	0
Tb427_000143000:pseudogene	453	0	0	0		0	0	0		0	0	0
Tb427_000143100	660	0	0	0		0	0	0		0	0	0
Tb427_000143200	1473	0	0	0		0	0	0		0	0	0
Tb427_000143300	1473	0	0	0		0	0	0		0	0	0
Tb427_000143400	282	0	0	0		0	0	0		0	0	0
Tb427_000143500:pseudogene	1566	0	0	2		0	0	1.27714		0	0	0.0408182
Tb427_000143600	414	0	0	0		0	0	0		0	0	0
Tb427_000143700	303	0	0	0		0	0	0		0	0	0
Tb427_000143800:pseudogene	1428	0	0	0		0	0	0		0	0	0
Tb427_000143900	375	0	0	0		0	0	0		0	0	0
Tb427_000144000:pseudogene	2490	7	2	2		2.81124	0.803213	0.803213		0.0953539	0.0260253	0.0256712
Tb427_000144100	747	0	0	0		0	0	0		0	0	0
Tb427_000144200	975	2	0	0		2.05128	0	0		0.0695769	0	0
Tb427_000144300:pseudogene	846	0	0	0		0	0	0		0	0	0
Tb427_000144400	1356	0	0	0		0	0	0		0	0	0
Tb427_000144500	3762	2165	1938	2028		575.492	515.152	539.075		19.52	16.6917	17.2292
Tb427_000144700	169	48	41	64		284.024	242.604	378.698		9.63373	7.86072	12.1034
Tb427_000144800	4346	6064	6560	6836		1395.31	1509.43	1572.94		47.327	48.9079	50.2722
Tb427_000144900	450	0	0	0		0	0	0		0	0	0
Tb427_000145100:pseudogene	1563	1	1	1		0.639795	0.639795	0.639795		0.0217011	0.0207303	0.0204483
Tb427_000145200:pseudogene	678	1	0	1		1.47493	0	1.47493		0.0500276	0	0.0471396
Tb427_000145300:pseudogene	513	0	0	1		0	0	1.94932		0	0	0.0623014
Tb427_000145400	798	0	0	0		0	0	0		0	0	0
Tb427_000145500:pseudogene	1056	0	0	0		0	0	0		0	0	0
Tb427_000145600:pseudogene	1404	2	0	2		1.4245	0	1.4245		0.0483173	0	0.045528
Tb427_000145700	1209	0	2	2		0	1.65426	1.65426		0	0.0536005	0.0528712
Tb427_000145800:pseudogene	1326	0	1	0		0	0.754148	0		0	0.0244355	0
Tb427_000145900:pseudogene	1413	4	0	0		2.83086	0	0		0.0960191	0	0
Tb427_000146000:pseudogene	1458	2	0	0		1.37174	0	0		0.0465278	0	0
Tb427_000146100:pseudogene	888	0	0	0		0	0	0		0	0	0
Tb427_000146200:pseudogene	1407	0	0	0		0	0	0		0	0	0
Tb427_000146300:pseudogene	1383	4	2	1		2.89226	1.44613	0.723066		0.0981019	0.0468568	0.0231096
Tb427_000146400	963	2	2	2		2.07684	2.07684	2.07684		0.0704439	0.0672928	0.0663772
Tb427_000146500	570	1	4	0		1.75439	7.01754	0		0.0595066	0.227379	0
Tb427_000146600	246	4	0	0		16.2602	0	0		0.551524	0	0
Tb427_000146700	474	12	0	0		25.3165	0	0		0.858702	0	0
Tb427_000146800:pseudogene	1386	132	6	4		95.2381	4.329	2.886		3.23036	0.140266	0.0922385
Tb427_000146900:pseudogene	909	13	2	0		14.3014	2.20022	0		0.485087	0.0712904	0
Tb427_000147000	1446	39	5	0		26.971	3.45781	0		0.914821	0.112038	0
Tb427_000147100	480	13	2	0		27.0833	4.16667	0		0.918633	0.135006	0
Tb427_000147200:pseudogene	861	16	0	0		18.583	0	0		0.630313	0	0
Tb427_000147300:pseudogene	1464	200	4	2		136.612	2.73224	1.36612		4.63371	0.0885287	0.0436621
Tb427_000147400:pseudogene	513	5	0	1		9.74659	0	1.94932		0.330592	0	0.0623014
Tb427_000147500:pseudogene	678	0	0	2		0	0	2.94985		0	0	0.0942792
Tb427_000147600:pseudogene	1296	0	0	0		0	0	0		0	0	0
Tb427_000147700	1383	0	2	0		0	1.44613	0		0	0.0468568	0
Tb427_000147800:pseudogene	1497	2	0	4		1.33601	0	2.67201		0.0453156	0	0.0853992
Tb427_000147900	1056	0	0	0		0	0	0		0	0	0
Tb427_000148000	1116	8	4	4		7.16846	3.58423	3.58423		0.243145	0.116134	0.114554
Tb427_000148100	1365	0	0	2		0	0	1.4652		0	0	0.0468288
Tb427_000148200:pseudogene	918	2	0	0		2.17865	0	0		0.073897	0	0
Tb427_000148300	600	0	0	0		0	0	0		0	0	0
Tb427_000148400	1566	0	0	0		0	0	0		0	0	0
Tb427_000148500:pseudogene	1530	0	0	0		0	0	0		0	0	0
Tb427_000148600	1209	2	0	0		1.65426	0	0		0.0561104	0	0
Tb427_000148700:pseudogene	1392	0	0	0		0	0	0		0	0	0
Tb427_000148800	1629	0	0	4		0	0	2.45549		0	0	0.0784792
Tb427_000148900:pseudogene	1422	0	0	0		0	0	0		0	0	0
Tb427_000149000:pseudogene	1413	0	0	0		0	0	0		0	0	0
Tb427_000149100:pseudogene	1479	0	0	0		0	0	0		0	0	0
Tb427_000149200:pseudogene	1395	0	0	0		0	0	0		0	0	0
Tb427_000149300:pseudogene	837	0	0	0		0	0	0		0	0	0
Tb427_000149400	1158	2	0	0		1.72712	0	0		0.0585816	0	0
Tb427_000149500:pseudogene	375	0	0	0		0	0	0		0	0	0
Tb427_000149600:pseudogene	1029	4	0	0		3.88727	0	0		0.131851	0	0
Tb427_000149700	1440	4	4	2		2.77778	2.77778	1.38889		0.0942187	0.0900042	0.0443898
Tb427_000149800	492	3	0	9		6.09756	0	18.2927		0.206822	0	0.584646
Tb427_000149900	600	0	0	0		0	0	0		0	0	0
Tb427_000150000:pseudogene	1290	0	0	2		0	0	1.55039		0	0	0.0495514
Tb427_000150100:pseudogene	1290	0	0	0		0	0	0		0	0	0
Tb427_000150200:pseudogene	912	0	0	0		0	0	0		0	0	0
Tb427_000150300:pseudogene	1452	4	3	2		2.75482	2.06612	1.37741		0.0934401	0.0669453	0.0440229
Tb427_000150400	846	0	2	0		0	2.36407	0		0	0.0765993	0
Tb427_000150500	1032	2	4	0		1.93798	3.87597	0		0.065734	0.125587	0
Tb427_000150600	2523	8	11	6		3.17083	4.35989	2.37812		0.107551	0.141267	0.0760063
Tb427_000150700:pseudogene	1449	4	0	0		2.76052	0	0		0.0936335	0	0
Tb427_000150800	504	0	0	0		0	0	0		0	0	0
Tb427_000150900:pseudogene	963	0	0	0		0	0	0		0	0	0
Tb427_000151000	690	0	0	0		0	0	0		0	0	0
Tb427_000151100:pseudogene	861	0	0	0		0	0	0		0	0	0
Tb427_000151200:pseudogene	1494	0	0	0		0	0	0		0	0	0
Tb427_000151300:pseudogene	1488	0	0	0		0	0	0		0	0	0
Tb427_000151400:pseudogene	1491	0	0	0		0	0	0		0	0	0
Tb427_000151500	1473	2	0	0		1.35777	0	0		0.046054	0	0
Tb427_000151600:pseudogene	1371	0	0	0		0	0	0		0	0	0
Tb427_000151700:pseudogene	1377	0	0	0		0	0	0		0	0	0
Tb427_000151800	1266	2	0	0		1.57978	0	0		0.0535841	0	0
Tb427_000151900	1230	0	0	6		0	0	4.87805		0	0	0.155906
Tb427_000152000	2358	0	0	0		0	0	0		0	0	0
Tb427_000152100:pseudogene	855	0	0	0		0	0	0		0	0	0
Tb427_000152200:pseudogene	1518	0	0	0		0	0	0		0	0	0
Tb427_000152300	1521	4	4	0		2.62985	2.62985	0		0.0892012	0.0852111	0
Tb427_000152400:pseudogene	1560	0	0	0		0	0	0		0	0	0
Tb427_000152500:pseudogene	1494	5	0	6		3.34672	0	4.01606		0.113517	0	0.128356
Tb427_000152600:pseudogene	453	0	0	0		0	0	0		0	0	0
Tb427_000152700:pseudogene	651	6	3	4		9.21659	4.60829	6.14439		0.312615	0.149316	0.196379
Tb427_000152800:pseudogene	618	10	13	10		16.1812	21.0356	16.1812		0.548847	0.681585	0.517163
Tb427_000152900	501	0	0	0		0	0	0		0	0	0
Tb427_000153000:pseudogene	1833	0	0	0		0	0	0		0	0	0
Tb427_000153100:pseudogene	1494	0	2	1		0	1.33869	0.669344		0	0.0433755	0.0213927
Tb427_000153200	1110	2	3	2		1.8018	2.7027	1.8018		0.0611149	0.0875716	0.0575867
Tb427_000153300:pseudogene	1425	2	0	0		1.40351	0	0		0.0476053	0	0
Tb427_000153400:pseudogene	1014	0	0	0		0	0	0		0	0	0
Tb427_000153500:pseudogene	966	0	0	0		0	0	0		0	0	0
Tb427_000153600:pseudogene	1470	0	4	0		0	2.72109	0		0	0.0881674	0
Tb427_000153700:pseudogene	1668	2	0	0		1.19904	0	0		0.04067	0	0
Tb427_000153800	270	0	0	0		0	0	0		0	0	0
Tb427_000153900:pseudogene	1533	0	0	0		0	0	0		0	0	0
Tb427_000154000:pseudogene	1377	2	0	0		1.45243	0	0		0.0492647	0	0
Tb427_000154100	2604	7	4	6		2.68817	1.5361	2.30415		0.0911794	0.0497719	0.073642
Tb427_000154200	960	2	2	0		2.08333	2.08333	0		0.070664	0.0675031	0
Tb427_000154300:pseudogene	585	0	0	0		0	0	0		0	0	0
Tb427_000154400:pseudogene	855	0	0	0		0	0	0		0	0	0
Tb427_000154500:pseudogene	1251	0	0	0		0	0	0		0	0	0
Tb427_000154600	1455	0	0	0		0	0	0		0	0	0
Tb427_000154700:pseudogene	888	0	0	0		0	0	0		0	0	0
Tb427_000154800:pseudogene	1503	0	0	0		0	0	0		0	0	0
Tb427_000154900	648	0	0	0		0	0	0		0	0	0
Tb427_000155000:pseudogene	282	0	0	0		0	0	0		0	0	0
Tb427_000155100:pseudogene	1113	0	0	0		0	0	0		0	0	0
Tb427_000155200:pseudogene	1380	0	0	2		0	0	1.44928		0	0	0.0463198
Tb427_000155300	483	0	0	0		0	0	0		0	0	0
Tb427_000155400:pseudogene	1491	0	0	0		0	0	0		0	0	0
Tb427_000155500:pseudogene	801	1	2	0		1.24844	2.49688	0		0.0423455	0.0809026	0
Tb427_000155600:pseudogene	1317	0	0	0		0	0	0		0	0	0
Tb427_000155700:pseudogene	1536	0	0	0		0	0	0		0	0	0
Tb427_000155800:pseudogene	864	0	0	0		0	0	0		0	0	0
Tb427_000155900	741	0	0	2		0	0	2.69906		0	0	0.0862635
Tb427_000156000:pseudogene	1383	2	0	0		1.44613	0	0		0.049051	0	0
Tb427_000156100:pseudogene	1455	0	0	0		0	0	0		0	0	0
Tb427_000156200:pseudogene	2493	0	0	4		0	0	1.60449		0	0	0.0512806
Tb427_000156300:pseudogene	1725	0	0	0		0	0	0		0	0	0
Tb427_000156400	1416	0	0	2		0	0	1.41243		0	0	0.0451422
Tb427_000156500:pseudogene	1485	0	0	0		0	0	0		0	0	0
Tb427_000156600	918	0	0	0		0	0	0		0	0	0
Tb427_000156700	1467	0	0	0		0	0	0		0	0	0
Tb427_000156800:pseudogene	1497	0	0	6		0	0	4.00802		0	0	0.128099
Tb427_000156900:pseudogene	927	0	0	0		0	0	0		0	0	0
Tb427_000157000:pseudogene	1524	0	0	0		0	0	0		0	0	0
Tb427_000157100:pseudogene	711	0	0	0		0	0	0		0	0	0
Tb427_000157200	357	0	0	2		0	0	5.60224		0	0	0.179051
Tb427_000157300:pseudogene	1377	0	0	0		0	0	0		0	0	0
Tb427_000157400	507	0	0	0		0	0	0		0	0	0
Tb427_000157500:pseudogene	1329	0	0	0		0	0	0		0	0	0
Tb427_000157600	564	0	0	0		0	0	0		0	0	0
Tb427_000157700	318	0	0	0		0	0	0		0	0	0
Tb427_000157800:pseudogene	936	0	0	2		0	0	2.13675		0	0	0.068292
Tb427_000157900:pseudogene	1485	0	0	0		0	0	0		0	0	0
Tb427_000158000	396	0	0	0		0	0	0		0	0	0
Tb427_000158100:pseudogene	2814	2	0	0		0.710732	0	0		0.0241071	0	0
Tb427_000158200:pseudogene	1344	0	0	0		0	0	0		0	0	0
Tb427_000158300:pseudogene	1191	0	0	0		0	0	0		0	0	0
Tb427_000158400:pseudogene	918	0	0	0		0	0	0		0	0	0
Tb427_000158500:pseudogene	1509	0	0	0		0	0	0		0	0	0
Tb427_000158600	1374	0	0	0		0	0	0		0	0	0
Tb427_000158700	294	0	0	0		0	0	0		0	0	0
Tb427_000158800	1107	0	0	0		0	0	0		0	0	0
Tb427_000158900	585	1	0	0		1.7094	0	0		0.0579808	0	0
Tb427_000159000:pseudogene	813	1	0	0		1.23001	0	0		0.0417205	0	0
Tb427_000159100:pseudogene	1008	249	0	0		247.024	0	0		8.37874	0	0
Tb427_000159200	900	6	0	2		6.66667	0	2.22222		0.226125	0	0.0710237
Tb427_000159300	363	3	0	0		8.26446	0	0		0.28032	0	0
Tb427_000159400	1533	27	0	0		17.6125	0	0		0.597395	0	0
Tb427_000159500:pseudogene	1536	0	0	0		0	0	0		0	0	0
Tb427_000159600	552	0	0	0		0	0	0		0	0	0
Tb427_000159700	963	0	0	0		0	0	0		0	0	0
Tb427_000159800:pseudogene	1371	0	0	0		0	0	0		0	0	0
Tb427_000159900:pseudogene	1137	0	0	0		0	0	0		0	0	0
Tb427_000160000	375	0	0	0		0	0	0		0	0	0
Tb427_000160100	303	0	0	0		0	0	0		0	0	0
Tb427_000160200	705	1	0	0		1.41844	0	0		0.0481117	0	0
Tb427_000160300	870	0	0	0		0	0	0		0	0	0
Tb427_000160400	1152	2	0	0		1.73611	0	0		0.0588867	0	0
Tb427_000160500:pseudogene	1554	0	0	0		0	0	0		0	0	0
Tb427_000160600:pseudogene	903	0	0	0		0	0	0		0	0	0
Tb427_000160700	1043	979	1156	1080		938.639	1108.34	1035.47		31.8374	35.9119	33.0944
Tb427_000160900:pseudogene	1551	0	0	0		0	0	0		0	0	0
Tb427_000161000:pseudogene	1317	0	0	0		0	0	0		0	0	0
Tb427_000161100:pseudogene	1491	2	8	4		1.34138	5.36553	2.68276		0.045498	0.173851	0.0857428
Tb427_000161200:pseudogene	1431	0	0	0		0	0	0		0	0	0
Tb427_000161300:pseudogene	1293	0	0	0		0	0	0		0	0	0
Tb427_000161400	1287	0	0	1		0	0	0.777001		0	0	0.0248334
Tb427_000161500:pseudogene	867	0	0	0		0	0	0		0	0	0
Tb427_000161600	321	0	0	0		0	0	0		0	0	0
Tb427_000161700:pseudogene	1485	0	0	0		0	0	0		0	0	0
Tb427_000161800:pseudogene	1161	0	0	0		0	0	0		0	0	0
Tb427_000161900:pseudogene	1230	0	2	3		0	1.62602	2.43902		0	0.0526854	0.0779528
Tb427_000162000:pseudogene	1449	7	0	0		4.83092	0	0		0.163859	0	0
Tb427_000162100	516	0	0	0		0	0	0		0	0	0
Tb427_000162200:pseudogene	831	0	0	0		0	0	0		0	0	0
Tb427_000162300	84	0	0	0		0	0	0		0	0	0
Tb427_000162400:pseudogene	1341	0	0	0		0	0	0		0	0	0
Tb427_000162500:pseudogene	1458	0	0	0		0	0	0		0	0	0
Tb427_000162600	624	2	3	2		3.20513	4.80769	3.20513		0.108714	0.155776	0.102438
Tb427_000162700:pseudogene	1269	0	0	0		0	0	0		0	0	0
Tb427_000162800:pseudogene	813	0	0	0		0	0	0		0	0	0
Tb427_000162900:pseudogene	1512	0	0	0		0	0	0		0	0	0
Tb427_000163000	1464	0	0	0		0	0	0		0	0	0
Tb427_000163100	744	0	0	0		0	0	0		0	0	0
Tb427_000163200:pseudogene	669	0	0	0		0	0	0		0	0	0
Tb427_000163300:pseudogene	837	0	0	0		0	0	0		0	0	0
Tb427_000163400:pseudogene	1503	0	0	0		0	0	0		0	0	0
Tb427_000163500:pseudogene	1191	0	0	0		0	0	0		0	0	0
Tb427_000163600:pseudogene	1344	0	0	0		0	0	0		0	0	0
Tb427_000163700	708	0	0	0		0	0	0		0	0	0
Tb427_000163800:pseudogene	1383	0	0	0		0	0	0		0	0	0
Tb427_000163900	1473	0	0	0		0	0	0		0	0	0
Tb427_000164000	528	10	4	10		18.9394	7.57576	18.9394		0.6424	0.245466	0.605315
Tb427_000164100	3495	23	18	13		6.58083	5.15021	3.7196		0.223213	0.166875	0.118881
Tb427_000164200:pseudogene	885	0	0	2		0	0	2.25989		0	0	0.0722274
Tb427_000164300	1581	0	0	0		0	0	0		0	0	0
Tb427_000164400	1476	0	0	2		0	0	1.35501		0	0	0.0433071
Tb427_000164500	528	0	0	0		0	0	0		0	0	0
Tb427_000164600:pseudogene	879	0	0	0		0	0	0		0	0	0
Tb427_000164700:pseudogene	1497	0	0	0		0	0	0		0	0	0
Tb427_000164800	1533	0	0	0		0	0	0		0	0	0
Tb427_000164900:pseudogene	1446	0	0	0		0	0	0		0	0	0
Tb427_000165000:pseudogene	888	0	0	0		0	0	0		0	0	0
Tb427_000165100	384	0	0	0		0	0	0		0	0	0
Tb427_000165200	435	0	0	0		0	0	0		0	0	0
Tb427_000165300	270	0	0	0		0	0	0		0	0	0
Tb427_000165400	903	0	0	2		0	0	2.21484		0	0	0.0707877
Tb427_000165500:pseudogene	1392	0	0	0		0	0	0		0	0	0
Tb427_000165600:pseudogene	1491	6	6	11		4.02414	4.02414	7.3776		0.136494	0.130388	0.235793
Tb427_000165700:pseudogene	1494	0	0	1		0	0	0.669344		0	0	0.0213927
Tb427_000165800:pseudogene	1227	0	0	0		0	0	0		0	0	0
Tb427_000165900	2595	5	2	6		1.92678	0.770713	2.31214		0.065354	0.0249723	0.0738974
Tb427_000166000:pseudogene	1161	0	0	0		0	0	0		0	0	0
Tb427_000166100:pseudogene	1494	2	3	2		1.33869	2.00803	1.33869		0.0454066	0.0650633	0.0427853
Tb427_000166200	609	0	0	0		0	0	0		0	0	0
Tb427_000166300	1458	0	0	0		0	0	0		0	0	0
Tb427_000166400	597	0	0	0		0	0	0		0	0	0
Tb427_000166500	972	2	4	0		2.05761	4.11523	0		0.0697917	0.13334	0
Tb427_000166600	306	2	2	0		6.53595	6.53595	0		0.221691	0.211775	0
Tb427_000166700	1956	4	4	8		2.04499	2.04499	4.08998		0.0693635	0.0662607	0.130718
Tb427_000166800	1515	2	0	2		1.32013	0	1.32013		0.0447772	0	0.0421923
Tb427_000166900	1146	0	0	0		0	0	0		0	0	0
Tb427_000167000	1146	0	0	0		0	0	0		0	0	0
Tb427_000167100:pseudogene	864	0	0	0		0	0	0		0	0	0
Tb427_000167200:pseudogene	885	2	0	0		2.25989	0	0		0.0766525	0	0
Tb427_000167300:pseudogene	1494	9	2	12		6.0241	1.33869	8.03213		0.20433	0.0433755	0.256712
Tb427_000167400:pseudogene	1215	7	0	0		5.76132	0	0		0.195417	0	0
Tb427_000167500	1383	12	0	0		8.67679	0	0		0.294306	0	0
Tb427_000167600	573	0	0	0		0	0	0		0	0	0
Tb427_000167700	567	0	0	0		0	0	0		0	0	0
Tb427_000167800	807	2	4	0		2.47831	4.95663	0		0.0840613	0.160602	0
Tb427_000167900	1917	2	2	0		1.0433	1.0433	0		0.0353873	0.0338044	0
Tb427_000168000:pseudogene	1335	2	0	0		1.49813	0	0		0.0508146	0	0
Tb427_000168100	831	0	0	0		0	0	0		0	0	0
Tb427_000168200:pseudogene	1098	0	0	0		0	0	0		0	0	0
Tb427_000168300:pseudogene	792	0	0	0		0	0	0		0	0	0
Tb427_000168400:pseudogene	1398	0	0	0		0	0	0		0	0	0
Tb427_000168500:pseudogene	1488	0	0	0		0	0	0		0	0	0
Tb427_000168600:pseudogene	2700	2	2	5		0.740741	0.740741	1.85185		0.025125	0.0240011	0.0591864
Tb427_000168700	1212	0	0	0		0	0	0		0	0	0
Tb427_000168800	666	0	0	0		0	0	0		0	0	0
Tb427_000168900	552	0	1	0		0	1.81159	0		0	0.0586984	0
Tb427_000169000:pseudogene	1557	0	0	0		0	0	0		0	0	0
Tb427_000169100:pseudogene	837	0	0	0		0	0	0		0	0	0
Tb427_000169200	1578	0	0	0		0	0	0		0	0	0
Tb427_000169300:pseudogene	873	0	0	0		0	0	0		0	0	0
Tb427_000169400	927	0	0	0		0	0	0		0	0	0
Tb427_000169500	747	0	0	0		0	0	0		0	0	0
Tb427_000169600:pseudogene	1329	2	0	0		1.50489	0	0		0.051044	0	0
Tb427_000169700:pseudogene	519	0	0	0		0	0	0		0	0	0
Tb427_000169800	1452	0	0	0		0	0	0		0	0	0
Tb427_000169900	972	0	0	0		0	0	0		0	0	0
Tb427_000170000:pseudogene	1413	0	0	0		0	0	0		0	0	0
Tb427_000170100	1494	0	0	0		0	0	0		0	0	0
Tb427_000170200:pseudogene	1305	0	0	2		0	0	1.53257		0	0	0.0489818
Tb427_000170300:pseudogene	1263	2	0	0		1.58353	0	0		0.0537114	0	0
Tb427_000170400:pseudogene	1545	0	0	0		0	0	0		0	0	0
Tb427_000170500:pseudogene	828	0	0	0		0	0	0		0	0	0
Tb427_000170600:pseudogene	1536	0	0	0		0	0	0		0	0	0
Tb427_000170700:pseudogene	1488	0	0	0		0	0	0		0	0	0
Tb427_000170800:pseudogene	876	0	0	0		0	0	0		0	0	0
Tb427_000170900:pseudogene	549	0	0	0		0	0	0		0	0	0
Tb427_000171000:pseudogene	2493	12	6	10		4.81348	2.40674	4.01123		0.163267	0.077982	0.128202
Tb427_000171100	1482	0	0	0		0	0	0		0	0	0
Tb427_000171200:pseudogene	861	0	0	0		0	0	0		0	0	0
Tb427_000171300	1527	0	0	0		0	0	0		0	0	0
Tb427_000171400:pseudogene	1281	0	0	0		0	0	0		0	0	0
Tb427_000171500	1629	0	0	0		0	0	0		0	0	0
Tb427_000171600:pseudogene	858	0	0	0		0	0	0		0	0	0
Tb427_000171700:pseudogene	1422	0	0	0		0	0	0		0	0	0
Tb427_000171800:pseudogene	2493	2	3	2		0.802246	1.20337	0.802246		0.0272112	0.038991	0.0256403
Tb427_000171900	1500	2	0	0		1.33333	0	0		0.045225	0	0
Tb427_000172000:pseudogene	873	0	0	0		0	0	0		0	0	0
Tb427_000172100:pseudogene	1371	0	0	0		0	0	0		0	0	0
Tb427_000172200:pseudogene	966	0	0	0		0	0	0		0	0	0
Tb427_000172300	813	0	0	0		0	0	0		0	0	0
Tb427_000172400	159	0	0	0		0	0	0		0	0	0
Tb427_000172500	588	0	0	0		0	0	0		0	0	0
Tb427_000172600:pseudogene	576	0	0	0		0	0	0		0	0	0
Tb427_000172700:pseudogene	957	0	0	0		0	0	0		0	0	0
Tb427_000172800:pseudogene	1509	0	0	0		0	0	0		0	0	0
Tb427_000172900	3495	26	43	17		7.4392	12.3033	4.86409		0.252328	0.398645	0.155459
Tb427_000173000	1272	10	3	4		7.86164	2.35849	3.14465		0.266657	0.0764186	0.100505
Tb427_000173100	3495	141	134	126		40.3433	38.3405	36.0515		1.3684	1.24229	1.15223
Tb427_000173200	903	0	0	2		0	0	2.21484		0	0	0.0707877
Tb427_000173300	618	104	97	147		168.285	156.958	237.864		5.70801	5.08567	7.60229
Tb427_000173400	1859	118	212	176		63.475	114.04	94.6746		2.15299	3.69506	3.02586
Tb427_000173500	576	0	0	0		0	0	0		0	0	0
Tb427_000173600	1395	576	856	380		412.903	613.62	272.401		14.0052	19.8822	8.70612
Tb427_000173700	978	67	57	26		68.5072	58.2822	26.5849		2.32368	1.88843	0.849669
Tb427_000173800	804	255	174	176		317.164	216.418	218.905		10.7578	7.01227	6.99636
Tb427_000173900	780	1207	1332	1111		1547.44	1707.69	1424.36		52.4871	55.3318	45.5234
Tb427_000174000	987	431	361	281		436.677	365.755	284.701		14.8115	11.851	9.09923
Tb427_000174100:pseudogene	885	101	60	86		114.124	67.7966	97.1751		3.87095	2.19671	3.10578
Tb427_000174200:pseudogene	873	353	320	235		404.353	366.552	269.187		13.7151	11.8768	8.60338
Tb427_000174300:pseudogene	996	263	219	278		264.056	219.88	279.116		8.95646	7.12443	8.92074
Tb427_000174400:pseudogene	1005	727	538	451		723.383	535.323	448.756		24.5362	17.3453	14.3425
Tb427_000174500:pseudogene	780	239	213	214		306.41	273.077	274.359		10.3931	8.8481	8.76869
Tb427_000174600:pseudogene	957	509	493	448		531.87	515.152	468.13		18.0404	16.6917	14.9617
Tb427_000174700	1356	936	1070	850		690.265	789.086	626.844		23.4129	25.5676	20.0343
Tb427_000174800	1113	1827	1972	1348		1641.51	1771.79	1211.14		55.6779	57.4086	38.7088
Tb427_000174900	984	777	808	668		789.634	821.138	678.862		26.7834	26.6061	21.6969
Tb427_000175000	96	172	190	153		1791.67	1979.17	1593.75		60.7711	64.128	50.9373
Tb427_000175100	285	568	548	468		1992.98	1922.81	1642.11		67.5995	62.3018	52.4827
Tb427_000175200:pseudogene	1362	1699	1694	1415		1247.43	1243.76	1038.91		42.3113	40.2997	33.2043
Tb427_000175300	144	233	241	222		1618.06	1673.61	1541.67		54.8824	54.2275	49.2727
Tb427_000175400	978	1217	1227	978		1244.38	1254.6	1000		42.2077	40.651	31.9606
Tb427_000175500:pseudogene	327	7	8	8		21.4067	24.4648	24.4648		0.726089	0.792697	0.781912
Tb427_000175600	540	9	4	9		16.6667	7.40741	16.6667		0.565312	0.240011	0.532677
Tb427_000175700	2487	52	40	36		20.9087	16.0836	14.4753		0.709198	0.521134	0.462639
Tb427_000175800	1515	39	49	46		25.7426	32.3432	30.363		0.873156	1.04797	0.970422
Tb427_000175900:pseudogene	1359	8	11	5		5.88668	8.09419	3.67918		0.199669	0.262264	0.117589
Tb427_000176000:pseudogene	984	0	2	0		0	2.03252	0		0	0.0658567	0
Tb427_000176100	690	0	0	2		0	0	2.89855		0	0	0.0926395
Tb427_000176200:pseudogene	1464	1	5	2		0.68306	3.4153	1.36612		0.0231685	0.110661	0.0436621
Tb427_000176300	1392	0	0	2		0	0	1.43678		0	0	0.0459205
Tb427_000176400	852	0	0	2		0	0	2.34742		0	0	0.075025
Tb427_000176500	270	0	0	0		0	0	0		0	0	0
Tb427_000176600	1320	0	0	0		0	0	0		0	0	0
Tb427_000176700:pseudogene	417	0	0	0		0	0	0		0	0	0
Tb427_000176800:pseudogene	1464	4	0	0		2.73224	0	0		0.0926742	0	0
Tb427_000176900:pseudogene	1254	2	0	2		1.5949	0	1.5949		0.0540969	0	0.0509739
Tb427_000177000:pseudogene	1419	86	0	0		60.6061	0	0		2.05568	0	0
Tb427_000177100:pseudogene	846	11	0	0		13.0024	0	0		0.441024	0	0
Tb427_000177200:pseudogene	864	12	0	0		13.8889	0	0		0.471094	0	0
Tb427_000177300:pseudogene	1347	0	0	2		0	0	1.48478		0	0	0.0474546
Tb427_000177400	375	0	0	0		0	0	0		0	0	0
Tb427_000177500:pseudogene	951	4	0	0		4.2061	0	0		0.142666	0	0
Tb427_000177600	1575	10	0	2		6.34921	0	1.26984		0.215357	0	0.0405849
Tb427_000177700:pseudogene	1257	25	0	2		19.8886	0	1.59109		0.674597	0	0.0508523
Tb427_000177800:pseudogene	837	7	0	0		8.3632	0	0		0.283669	0	0
Tb427_000177900:pseudogene	864	9	0	0		10.4167	0	0		0.35332	0	0
Tb427_000178000	1470	68	2	0		46.2585	1.36054	0		1.56903	0.0440837	0
Tb427_000178100:pseudogene	978	5	0	0		5.11247	0	0		0.173409	0	0
Tb427_000178200:pseudogene	1320	8	0	0		6.06061	0	0		0.205568	0	0
Tb427_000178300:pseudogene	1467	0	0	0		0	0	0		0	0	0
Tb427_000178400:pseudogene	885	0	0	0		0	0	0		0	0	0
Tb427_000178500:pseudogene	1344	0	0	1		0	0	0.744048		0	0	0.0237802
Tb427_000178600:pseudogene	1305	0	0	0		0	0	0		0	0	0
Tb427_000178700:pseudogene	1455	0	0	0		0	0	0		0	0	0
Tb427_000178800:pseudogene	1140	0	0	0		0	0	0		0	0	0
Tb427_000178900	354	0	0	2		0	0	5.64972		0	0	0.180569
Tb427_000179000:pseudogene	1341	0	0	0		0	0	0		0	0	0
Tb427_000179100	1524	124	45	74		81.3648	29.5276	48.5564		2.75979	0.956737	1.55189
Tb427_000179200	2490	85	127	96		34.1365	51.004	38.5542		1.15787	1.65261	1.23222
Tb427_000179300	648	0	0	0		0	0	0		0	0	0
Tb427_000179400	1422	0	2	0		0	1.40647	0		0	0.0455717	0
Tb427_000179500	948	0	0	0		0	0	0		0	0	0
Tb427_000179600:pseudogene	1389	0	0	0		0	0	0		0	0	0
Tb427_000179700:pseudogene	1503	4	0	2		2.66134	0	1.33067		0.0902694	0	0.0425291
Tb427_000179800:pseudogene	582	0	0	0		0	0	0		0	0	0
Tb427_000179900	1614	0	0	1		0	0	0.619579		0	0	0.0198021
Tb427_000180000:pseudogene	837	0	4	7		0	4.77897	8.3632		0	0.154846	0.267293
Tb427_000180100:pseudogene	1392	0	0	0		0	0	0		0	0	0
Tb427_000180200:pseudogene	1281	0	0	0		0	0	0		0	0	0
Tb427_000180300	1299	0	0	0		0	0	0		0	0	0
Tb427_000180400:pseudogene	1305	0	0	0		0	0	0		0	0	0
Tb427_000180500:pseudogene	1338	0	0	0		0	0	0		0	0	0
Tb427_000180600:pseudogene	849	0	0	0		0	0	0		0	0	0
Tb427_000180700:pseudogene	1503	0	2	0		0	1.33067	0		0	0.0431158	0
Tb427_000180800	636	0	0	0		0	0	0		0	0	0
Tb427_000180900:pseudogene	1293	0	0	0		0	0	0		0	0	0
Tb427_000181000:pseudogene	1392	0	0	0		0	0	0		0	0	0
Tb427_000181100	546	0	0	0		0	0	0		0	0	0
Tb427_000181200:pseudogene	1506	0	148	44		0	98.2736	29.2165		0	3.18421	0.933777
Tb427_000181300	432	0	0	0		0	0	0		0	0	0
Tb427_000181400	1359	0	0	0		0	0	0		0	0	0
Tb427_000181500	582	0	0	0		0	0	0		0	0	0
Tb427_000181600:pseudogene	1251	0	0	0		0	0	0		0	0	0
Tb427_000181700:pseudogene	1602	0	2	0		0	1.24844	0		0	0.0404513	0
Tb427_000181800	1509	0	0	0		0	0	0		0	0	0
Tb427_000181900	672	0	0	0		0	0	0		0	0	0
Tb427_000182000:pseudogene	1494	4	12	15		2.67738	8.03213	10.0402		0.0908132	0.260253	0.32089
Tb427_000182100:pseudogene	1392	0	0	0		0	0	0		0	0	0
Tb427_000182200	1620	0	0	0		0	0	0		0	0	0
Tb427_000182300:pseudogene	1599	0	0	0		0	0	0		0	0	0
Tb427_000182400:pseudogene	921	0	0	0		0	0	0		0	0	0
Tb427_000182500	1551	0	0	0		0	0	0		0	0	0
Tb427_000182600:pseudogene	1527	0	0	0		0	0	0		0	0	0
Tb427_000182700:pseudogene	870	0	0	0		0	0	0		0	0	0
Tb427_000182800	957	0	0	0		0	0	0		0	0	0
Tb427_000182900	576	0	0	0		0	0	0		0	0	0
Tb427_000183000	1446	0	2	2		0	1.38313	1.38313		0	0.0448154	0.0442056
Tb427_000183100:pseudogene	1515	0	0	0		0	0	0		0	0	0
Tb427_000183200	1509	0	1	0		0	0.662691	0		0	0.0214722	0
Tb427_000183300:pseudogene	1368	0	0	0		0	0	0		0	0	0
Tb427_000183400:pseudogene	1443	14	0	0		9.70201	0	0		0.32908	0	0
Tb427_000183500:pseudogene	1341	21	0	0		15.66	0	0		0.531166	0	0
Tb427_000183600:pseudogene	1326	0	0	0		0	0	0		0	0	0
Tb427_000183700:pseudogene	606	0	0	0		0	0	0		0	0	0
Tb427_000183800:pseudogene	1599	6	0	2		3.75235	0	1.25078		0.127275	0	0.0399758
Tb427_000183900:pseudogene	1266	0	0	0		0	0	0		0	0	0
Tb427_000184000:pseudogene	1464	0	0	0		0	0	0		0	0	0
Tb427_000184100	1059	0	0	0		0	0	0		0	0	0
Tb427_000184200:pseudogene	1389	0	0	0		0	0	0		0	0	0
Tb427_000184300:pseudogene	846	0	0	0		0	0	0		0	0	0
Tb427_000184400:pseudogene	1551	0	0	0		0	0	0		0	0	0
Tb427_000184500:pseudogene	1269	0	0	0		0	0	0		0	0	0
Tb427_000184600	1509	0	0	0		0	0	0		0	0	0
Tb427_000184700:pseudogene	1350	0	0	3		0	0	2.22222		0	0	0.0710237
Tb427_000184800:pseudogene	1485	0	0	0		0	0	0		0	0	0
Tb427_000184900:pseudogene	1368	0	0	0		0	0	0		0	0	0
Tb427_000185000	357	0	0	0		0	0	0		0	0	0
Tb427_000185100	1473	0	0	0		0	0	0		0	0	0
Tb427_000185200:pseudogene	864	0	0	0		0	0	0		0	0	0
Tb427_000185300:pseudogene	477	0	0	0		0	0	0		0	0	0
Tb427_000185400	1398	0	0	0		0	0	0		0	0	0
Tb427_000185500:pseudogene	1299	0	0	0		0	0	0		0	0	0
Tb427_000185600:pseudogene	1041	0	0	0		0	0	0		0	0	0
Tb427_000185700:pseudogene	432	0	0	0		0	0	0		0	0	0
Tb427_000185800:pseudogene	1536	0	7	0		0	4.55729	0		0	0.147663	0
Tb427_000185900	1569	0	4	2		0	2.54939	1.2747		0	0.0826042	0.0407401
Tb427_000186000:pseudogene	1215	0	0	0		0	0	0		0	0	0
Tb427_000186100:pseudogene	546	0	0	0		0	0	0		0	0	0
Tb427_000186200:pseudogene	1575	0	2	0		0	1.26984	0		0	0.0411448	0
Tb427_000186300:pseudogene	1464	0	0	0		0	0	0		0	0	0
Tb427_000186400:pseudogene	1368	7	0	2		5.11696	0	1.46199		0.173561	0	0.0467261
Tb427_000186500:pseudogene	1524	0	0	0		0	0	0		0	0	0
Tb427_000186600:pseudogene	849	0	0	0		0	0	0		0	0	0
Tb427_000186700:pseudogene	1524	0	0	0		0	0	0		0	0	0
Tb427_000186800:pseudogene	1440	0	0	0		0	0	0		0	0	0
Tb427_000186900	858	13	0	0		15.1515	0	0		0.51392	0	0
Tb427_000187000:pseudogene	1494	2	0	0		1.33869	0	0		0.0454066	0	0
Tb427_000187100	1461	0	0	0		0	0	0		0	0	0
Tb427_000187200:pseudogene	1422	0	0	0		0	0	0		0	0	0
Tb427_000187300	1407	0	0	0		0	0	0		0	0	0
Tb427_000187400:pseudogene	852	0	1	0		0	1.17371	0		0	0.0380299	0
Tb427_000187500:pseudogene	825	0	0	0		0	0	0		0	0	0
Tb427_000187600:pseudogene	1458	0	0	0		0	0	0		0	0	0
Tb427_000187700	1698	0	0	0		0	0	0		0	0	0
Tb427_000187800:pseudogene	1494	10	2	0		6.69344	1.33869	0		0.227033	0.0433755	0
Tb427_000187900	1419	0	0	0		0	0	0		0	0	0
Tb427_000188000:pseudogene	1275	0	0	1		0	0	0.784314		0	0	0.0250672
Tb427_000188100	1077	0	0	0		0	0	0		0	0	0
Tb427_000188200:pseudogene	1518	0	0	0		0	0	0		0	0	0
Tb427_000188300	1353	0	0	0		0	0	0		0	0	0
Tb427_000188400	1326	0	0	0		0	0	0		0	0	0
Tb427_000188500:pseudogene	1503	0	0	0		0	0	0		0	0	0
Tb427_000188600:pseudogene	1572	0	0	0		0	0	0		0	0	0
Tb427_000188700:pseudogene	2427	7	5	6		2.88422	2.06016	2.47219		0.0978291	0.0667522	0.0790127
Tb427_000188800:pseudogene	1395	0	0	0		0	0	0		0	0	0
Tb427_000188900	1395	0	0	1		0	0	0.716846		0	0	0.0229109
Tb427_000189000	1419	0	0	0		0	0	0		0	0	0
Tb427_000189100:pseudogene	1314	0	0	0		0	0	0		0	0	0
Tb427_000189200:pseudogene	1533	0	0	0		0	0	0		0	0	0
Tb427_000189300	1158	0	0	0		0	0	0		0	0	0
Tb427_000189400:pseudogene	915	2	0	0		2.18579	0	0		0.0741393	0	0
Tb427_000189500	270	0	0	0		0	0	0		0	0	0
Tb427_000189600:pseudogene	480	0	0	0		0	0	0		0	0	0
Tb427_000189700:pseudogene	1383	0	0	0		0	0	0		0	0	0
Tb427_000189800	636	0	0	0		0	0	0		0	0	0
Tb427_000189900:pseudogene	2424	2	0	0		0.825083	0	0		0.0279858	0	0
Tb427_000190000:pseudogene	1494	0	0	0		0	0	0		0	0	0
Tb427_000190100:pseudogene	1335	0	0	0		0	0	0		0	0	0
Tb427_000190200:pseudogene	1440	0	0	0		0	0	0		0	0	0
Tb427_000190300:pseudogene	468	0	0	0		0	0	0		0	0	0
Tb427_000190400	1107	0	0	0		0	0	0		0	0	0
Tb427_000190500:pseudogene	1344	0	0	0		0	0	0		0	0	0
Tb427_000190600	1422	0	0	0		0	0	0		0	0	0
Tb427_000190700:pseudogene	876	0	0	0		0	0	0		0	0	0
Tb427_000190800:pseudogene	1134	0	0	0		0	0	0		0	0	0
Tb427_000190900	906	2	0	0		2.20751	0	0		0.0748758	0	0
Tb427_000191000	1821	4	4	10		2.1966	2.1966	5.49149		0.0745058	0.071173	0.175511
Tb427_000191100	987	0	0	0		0	0	0		0	0	0
Tb427_000191200:pseudogene	885	0	0	0		0	0	0		0	0	0
Tb427_000191300	1542	0	0	0		0	0	0		0	0	0
Tb427_000191400:pseudogene	1587	0	0	2		0	0	1.26024		0	0	0.0402781
Tb427_000191500:pseudogene	1023	0	0	0		0	0	0		0	0	0
Tb427_000191600:pseudogene	846	0	0	0		0	0	0		0	0	0
Tb427_000191700	1473	0	0	0		0	0	0		0	0	0
Tb427_000191800:pseudogene	1557	6	0	0		3.85356	0	0		0.130708	0	0
Tb427_000191900:pseudogene	822	0	0	0		0	0	0		0	0	0
Tb427_000192000:pseudogene	1503	0	0	0		0	0	0		0	0	0
Tb427_000192100	1458	2	0	2		1.37174	0	1.37174		0.0465278	0	0.0438418
Tb427_000192200:pseudogene	1323	2	0	2		1.51172	0	1.51172		0.0512755	0	0.0483154
Tb427_000192300:pseudogene	555	0	0	0		0	0	0		0	0	0
Tb427_000192400:pseudogene	1503	48	0	2		31.9361	0	1.33067		1.08323	0	0.0425291
Tb427_000192500	1536	2	0	0		1.30208	0	0		0.044165	0	0
Tb427_000192600	321	0	1	0		0	3.11526	0		0	0.100939	0
Tb427_000192700	1506	0	0	0		0	0	0		0	0	0
Tb427_000192800:pseudogene	1449	0	0	0		0	0	0		0	0	0
Tb427_000192900	2688	9	6	6		3.34821	2.23214	2.23214		0.113567	0.0723248	0.0713407
Tb427_000193000	1962	7	0	2		3.56779	0	1.01937		0.121015	0	0.0325797
Tb427_000193100	1464	0	0	0		0	0	0		0	0	0
Tb427_000193200:pseudogene	1353	0	0	0		0	0	0		0	0	0
Tb427_000193300:pseudogene	1152	0	0	0		0	0	0		0	0	0
Tb427_000193400:pseudogene	1503	0	0	0		0	0	0		0	0	0
Tb427_000193500	1455	0	0	0		0	0	0		0	0	0
Tb427_000193600	840	0	0	0		0	0	0		0	0	0
Tb427_000193700:pseudogene	1956	4	8	13		2.04499	4.08998	6.64622		0.0693635	0.132521	0.212417
Tb427_000193800:pseudogene	1596	0	2	0		0	1.25313	0		0	0.0406034	0
Tb427_000193900:pseudogene	1188	0	0	0		0	0	0		0	0	0
Tb427_000194000:pseudogene	735	0	0	0		0	0	0		0	0	0
Tb427_000194100:pseudogene	1461	0	0	0		0	0	0		0	0	0
Tb427_000194200:pseudogene	1335	0	0	2		0	0	1.49813		0	0	0.0478811
Tb427_000194300:pseudogene	516	0	0	0		0	0	0		0	0	0
Tb427_000194400:pseudogene	2490	0	2	2		0	0.803213	0.803213		0	0.0260253	0.0256712
Tb427_000194500:pseudogene	1338	2	0	0		1.49477	0	0		0.0507007	0	0
Tb427_000194600:pseudogene	882	0	0	0		0	0	0		0	0	0
Tb427_000194700	741	0	0	2		0	0	2.69906		0	0	0.0862635
Tb427_000194800:pseudogene	1443	0	0	0		0	0	0		0	0	0
Tb427_000194900	1278	0	0	1		0	0	0.782473		0	0	0.0250083
Tb427_000195000:pseudogene	1359	0	0	0		0	0	0		0	0	0
Tb427_000195100:pseudogene	762	0	0	0		0	0	0		0	0	0
Tb427_000195200:pseudogene	858	0	0	0		0	0	0		0	0	0
Tb427_000195300	1536	0	0	0		0	0	0		0	0	0
Tb427_000195400:pseudogene	1521	0	0	0		0	0	0		0	0	0
Tb427_000195500:pseudogene	549	0	0	2		0	0	3.64299		0	0	0.116432
Tb427_000195600:pseudogene	1587	2	0	0		1.26024	0	0		0.0427457	0	0
Tb427_000195700:pseudogene	1629	0	0	2		0	0	1.22775		0	0	0.0392396
Tb427_000195800:pseudogene	405	0	0	0		0	0	0		0	0	0
Tb427_000195900:pseudogene	1401	0	0	0		0	0	0		0	0	0
Tb427_000196000:pseudogene	480	0	0	0		0	0	0		0	0	0
Tb427_000196100:pseudogene	1563	0	0	0		0	0	0		0	0	0
Tb427_000196200	489	0	0	0		0	0	0		0	0	0
Tb427_000196300	540	0	0	0		0	0	0		0	0	0
Tb427_000196400:pseudogene	1461	0	0	0		0	0	0		0	0	0
Tb427_000196500	1584	0	0	0		0	0	0		0	0	0
Tb427_000196600:pseudogene	471	0	0	0		0	0	0		0	0	0
Tb427_000196700:pseudogene	1335	0	0	0		0	0	0		0	0	0
Tb427_000196800:pseudogene	1068	0	0	0		0	0	0		0	0	0
Tb427_000196900:pseudogene	1614	0	0	0		0	0	0		0	0	0
Tb427_000197000:pseudogene	1383	0	0	0		0	0	0		0	0	0
Tb427_000197100:pseudogene	864	0	0	0		0	0	0		0	0	0
Tb427_000197200	534	0	0	0		0	0	0		0	0	0
Tb427_000197300	927	649	611	603		700.108	659.115	650.485		23.7468	21.3563	20.7899
Tb427_000197400	1842	502	540	516		272.53	293.16	280.13		9.24387	9.49881	8.95314
Tb427_000197500	1371	842	848	867		614.15	618.527	632.385		20.8312	20.0412	20.2114
Tb427_000197600	249	24	28	29		96.3855	112.45	116.466		3.26928	3.64354	3.72232
Tb427_000197700:pseudogene	1140	1166	1214	1255		1022.81	1064.91	1100.88		34.6923	34.5048	35.1847
Tb427_000197800	228	147	122	152		644.737	535.088	666.667		21.8687	17.3376	21.3071
Tb427_000197900	1014	194	181	145		191.321	178.501	142.998		6.48938	5.7837	4.57031
Tb427_000198000	726	447	439	517		615.702	604.683	712.121		20.8839	19.5926	22.7599
Tb427_000198100:pseudogene	2442	1208	1212	1228		494.676	496.314	502.867		16.7788	16.0813	16.0719
Tb427_000198200	1581	0	0	0		0	0	0		0	0	0
Tb427_000198300	750	0	0	0		0	0	0		0	0	0
Tb427_000198400	510	0	0	0		0	0	0		0	0	0
Tb427_000198500	219	0	0	0		0	0	0		0	0	0
Tb427_000198600	1650	0	0	0		0	0	0		0	0	0
Tb427_000198800	1569	0	0	0		0	0	0		0	0	0
Tb427_000198900:pseudogene	912	0	0	0		0	0	0		0	0	0
Tb427_000199000	1536	0	0	0		0	0	0		0	0	0
Tb427_000199100:pseudogene	1452	0	0	0		0	0	0		0	0	0
Tb427_000199200:pseudogene	1365	0	0	0		0	0	0		0	0	0
Tb427_000199300:pseudogene	1323	0	0	0		0	0	0		0	0	0
Tb427_000199400:pseudogene	1566	0	0	0		0	0	0		0	0	0
Tb427_000199500	1350	0	0	0		0	0	0		0	0	0
Tb427_000199600:pseudogene	1506	0	0	0		0	0	0		0	0	0
Tb427_000199700	1650	0	0	0		0	0	0		0	0	0
Tb427_000199800:pseudogene	1464	2	0	0		1.36612	0	0		0.0463371	0	0
Tb427_000199900:pseudogene	477	0	0	0		0	0	0		0	0	0
Tb427_000200000:pseudogene	423	0	0	0		0	0	0		0	0	0
Tb427_000200100	495	4	3	2		8.08081	6.06061	4.0404		0.274091	0.196373	0.129134
Tb427_000200200:pseudogene	468	2	2	2		4.2735	4.2735	4.2735		0.144952	0.138468	0.136584
Tb427_000200300:pseudogene	312	21	12	8		67.3077	38.4615	25.641		2.28299	1.24621	0.819504
Tb427_000200400	879	0	0	0		0	0	0		0	0	0
Tb427_000200500:pseudogene	666	0	0	1		0	0	1.5015		0	0	0.047989
Tb427_000200600:pseudogene	555	80	75	70		144.144	135.135	126.126		4.88919	4.37858	4.03107
Tb427_000200700	1023	446	435	347		435.973	425.22	339.198		14.7876	13.7778	10.841
Tb427_000200800	774	419	435	209		541.344	562.016	270.026		18.3617	18.2101	8.6302
Tb427_000200900	516	0	0	0		0	0	0		0	0	0
Tb427_000201000	1098	0	0	0		0	0	0		0	0	0
Tb427_000201100	828	0	0	0		0	0	0		0	0	0
Tb427_000201200:pseudogene	876	0	0	2		0	0	2.28311		0	0	0.0729695
Tb427_000201300:pseudogene	1455	0	0	0		0	0	0		0	0	0
Tb427_000201400	1596	0	0	3		0	0	1.8797		0	0	0.0600764
Tb427_000201500:pseudogene	1503	0	0	0		0	0	0		0	0	0
Tb427_000201600:pseudogene	867	0	0	0		0	0	0		0	0	0
Tb427_000201700:pseudogene	1587	0	0	0		0	0	0		0	0	0
Tb427_000201800:pseudogene	786	0	0	0		0	0	0		0	0	0
Tb427_000201900:pseudogene	1053	0	0	0		0	0	0		0	0	0
Tb427_000202000:pseudogene	1521	0	0	1		0	0	0.657462		0	0	0.0210129
Tb427_000202100:pseudogene	1347	0	0	0		0	0	0		0	0	0
Tb427_000202200	294	0	0	0		0	0	0		0	0	0
Tb427_000202300:pseudogene	1500	0	0	0		0	0	0		0	0	0
Tb427_000202400:pseudogene	1455	0	0	0		0	0	0		0	0	0
Tb427_000202500:pseudogene	1491	0	0	0		0	0	0		0	0	0
Tb427_000202600	573	0	0	0		0	0	0		0	0	0
Tb427_000202700	372	0	0	0		0	0	0		0	0	0
Tb427_000202800:pseudogene	1494	6	6	15		4.01606	4.01606	10.0402		0.13622	0.130127	0.32089
Tb427_000202900	357	0	0	0		0	0	0		0	0	0
Tb427_000203000:pseudogene	1218	0	0	0		0	0	0		0	0	0
Tb427_000203100	711	0	0	0		0	0	0		0	0	0
Tb427_000203200:pseudogene	1389	0	0	0		0	0	0		0	0	0
Tb427_000203300	801	0	0	0		0	0	0		0	0	0
Tb427_000203400:pseudogene	1500	0	0	2		0	0	1.33333		0	0	0.0426142
Tb427_000203500	639	0	0	2		0	0	3.12989		0	0	0.100033
Tb427_000203600:pseudogene	951	1	0	0		1.05152	0	0		0.0356664	0	0
Tb427_000203700:pseudogene	1488	2	0	0		1.34409	0	0		0.0455897	0	0
Tb427_000203800:pseudogene	1116	0	0	0		0	0	0		0	0	0
Tb427_000203900:pseudogene	1302	0	0	0		0	0	0		0	0	0
Tb427_000204000:pseudogene	861	0	0	0		0	0	0		0	0	0
Tb427_000204100	1512	0	0	0		0	0	0		0	0	0
Tb427_000204200:pseudogene	1392	0	0	0		0	0	0		0	0	0
Tb427_000204300:pseudogene	1476	0	0	0		0	0	0		0	0	0
Tb427_000204400	1368	0	0	0		0	0	0		0	0	0
Tb427_000204500:pseudogene	831	0	0	0		0	0	0		0	0	0
Tb427_000204600:pseudogene	897	0	1	0		0	1.11483	0		0	0.0361221	0
Tb427_000204700:pseudogene	1506	52	22	27		34.5286	14.6082	17.9283		1.17117	0.473329	0.573
Tb427_000204800:pseudogene	1833	86	28	44		46.9176	15.2755	24.0044		1.59139	0.494949	0.767195
Tb427_000204900:pseudogene	819	0	0	0		0	0	0		0	0	0
Tb427_000205000:pseudogene	330	0	0	0		0	0	0		0	0	0
Tb427_000205100:pseudogene	1302	0	0	1		0	0	0.768049		0	0	0.0245473
Tb427_000205200:pseudogene	885	0	0	0		0	0	0		0	0	0
Tb427_000205300:pseudogene	867	2	0	0		2.30681	0	0		0.0782439	0	0
Tb427_000205400	1143	1	0	0		0.874891	0	0		0.0296752	0	0
Tb427_000205500:pseudogene	342	0	0	0		0	0	0		0	0	0
[truncated: 15,247 more rows]
