# Supplementary material for: Cell surface localisation of GPI-anchored receptors in Trypanosoma brucei
Source: eLife. 2026 May 19;14:RP107191. doi: 10.7554/eLife.107191 (PMC13186567; doi:10.7554/eLife.107191)
Supplement: Supplementary file 2. [file elife-107191-supp2.xlsx]

## Sheet: Sheet1
Supplemementary File 2. Oligonucleotides
		Forward	Reverse	Template
BES7-ESAG7 + GPI anchor	PacI-EcoRI	TGATTAATTAAGGTCTTGCGCT	GTGGAATTCATCTTGTTCAATCAT	BES7 gDNA
	EcoRI-PacI	ATCGCCTTCTTGACGAATTCTT	CAATTAATTAAGCGCATCAACTTGCACC	BES7 gDNA
Blast R	EcoRI-EcoRI	CCCGAATTCTAGATGCCTTTGTCTCAAGAAGAA	GCAGAATTCTTAGCCCTCCCACACATAACC	pPOT v7 Blast-Blast
BES7-ESAG7 no anchor	SacI-BsrBI	GTTGAGCTCACTAATGATCAGC	CCCCGCTCCCGTGAAAGGT	RT-PCR from Lister427 MiTat1.2 purified RNA
sgRNA templates	5' G418 resistance gene	GAAATTAATACGACTCACTATAGGGAATAGCCTCTCCACCCAAGGTTTTAGAGCTAGAAATAGC
	ESAG7 3'UTR	GAAATTAATACGACTCACTATAGGAACGTGTGAAGCCTGAAATGGTTTTAGAGCTAGAAATAGC
BES1-ESAG7 no anchor	PacI-BstEII	TGATTAATTAAGGTCTTGCGCT	GATGTCGAGCCCGACGCGCGTG	BES7 gDNA (contains G418 resitance gene in BES1 expression site)
	BstEII-PacI	CCACGCGCCACACCGTCGACCC	CAATTAATTAAGCGCATCAACTTGCACC	BES7 gDNA (contains G418 resitance gene in BES1 expression site)
BES1-ESAG7 + GPI anchor	SacI-BES7-ESAG7 stop	GGAGGCTGAGCTCACTAATGATCAGC	TCACAGCACTCCCAACAATAAAGCTGAAC	BES7-ESAG7 + GPI-anchor clone
	BES7-ESAG7 stop-PacI	AGGAAGGATGCGACAGAAGCTGC	CGTTGGGAGCTCTCCCATATGGTC	BES1-ESAG7 no anchor clone
sgRNA templates	5' UTR	GAAATTAATACGACTCACTATAGGAGTCATGCATGAACCGACAAGTTTTAGAGCTAGAAATAGC
	ESAG7 3'UTR	GAAATTAATACGACTCACTATAGGAACGTGTGAAGCCTGAAATGGTTTTAGAGCTAGAAATAGC
VSG221 in BES7 switch	KpnI-XhoI	GCTGGTACCCAAAGATTTGTTTTGAGGAG	CGCCTCGAGGCTTGGTTTTGCTGATCTTA	BES7(TAR153) DNA
	SpeI-SacI	CTTACTAGTATTTTTCCCCCTCAATTTTCCTT	AAAGAGCTCGTGAATCAAAAAAAAAAAATTAAATTC	BES7(TAR153) DNA
