# Supplementary material for: Cell surface localisation of GPI-anchored receptors in Trypanosoma brucei
Source: eLife. 2026 May 19;14:RP107191. doi: 10.7554/eLife.107191 (PMC13186567; doi:10.7554/eLife.107191)
Supplement: Supplementary file 3. [file elife-107191-supp3.xlsx]

## Sheet: Sheet1
Table S2
BES7 1GPI									BES7 2GPI
15sec			60sec			600sec			15sec			60 sec			600 sec
Tf signal	Background	Corrected	Tf signal	Background	Corrected	Tf signal	Background	Corrected	Tf signal	Background	Corrected	Tf signal	Background	Corrected	Tf signal	Background	Corrected
270.527	199.471	71.0562	307.898	255.838	52.0603	298.188	247.518	50.6698	247.893	182.853	65.04	390.967	225.475	165.491	606.639	278.713	327.926
216.021	191.247	24.7745	534.819	273.521	261.299	421.621	259.611	162.009	265.318	184.885	80.4324	467.653	235.808	231.845	522.837	278.919	243.917
225.961	187.769	38.1917	352.109	271.573	80.5367	525.067	275.331	249.736	237.912	187.1	50.8122	739.189	237.932	501.257	321.815	268.369	53.446
223.644	191.168	32.4754	422.855	268.709	154.147	404.223	264.125	140.098	349.816	188.07	161.746	565.4	238.383	327.017	502.132	273.638	228.494
240.178	197.369	42.8092	526.585	267.441	259.145	317.201	265.284	51.9174	293.908	185.159	108.75	358.142	224.732	133.409	500.773	281.696	219.077
223.788	196.606	27.1816	326.277	268.906	57.3708	354.473	257.252	97.2201	303.538	188.214	115.324	287.356	218.453	68.9024	357.374	284.067	73.3067
211.062	195.938	15.1239	336.228	247.644	88.5839	281.167	263.821	17.3458	242.402	180.269	62.1334	630.248	216.68	413.568	634.464	293.588	340.877
285.61	202.175	83.4346	562.718	264.388	298.33	545.338	265.135	280.203	282.917	183.413	99.5048	430.279	226.177	204.102	434.645	288.378	146.267
319.135	204.517	114.618	526.355	279.858	246.497	279.49	247.529	31.9608	244.126	177.528	66.5981	687.079	247.524	439.556	358.443	285.289	73.1541
291.466	203.172	88.2938	481.369	277.767	203.601	329.18	279.044	50.1361	318.052	185.545	132.507	422.427	229.019	193.408	705.009	305.745	399.264
227.406	196.659	30.747	418.053	264.295	153.758	368.099	287.521	80.5787	279.258	177.741	101.517	323.107	230.68	92.4264	407.803	296.757	111.046
273.04	197.472	75.5679	520.492	281.689	238.802	418.604	283.053	135.551	282.689	180.298	102.391	817.272	257.465	559.806	466.453	284.082	182.371
227.676	198.695	28.9807	725.055	292.029	433.026	296.116	272.594	23.5223	307.714	174.543	133.171	867.563	245.31	622.254	411.331	282.331	129
310.922	199.041	111.881	342.698	269.358	73.3406	368.292	296.64	71.6519	292.107	180.116	111.991	784.141	245.23	538.911	431.445	265.009	166.437
329.087	199.745	129.342	722.319	303.038	419.281	313.84	287.691	26.1491	234.643	183.175	51.4678	915.11	243.716	671.394	392.93	244.141	148.789
325.986	202.776	123.21	365.882	251.106	114.776	348.657	282.907	65.7502	256.772	174.755	82.0173	576.87	232.767	344.102	349.663	255.514	94.1491
303.678	201.609	102.069	342.563	243.341	99.2228	324.306	286.77	37.5356	183.015	168.349	14.6663	282.631	210.943	71.6878	402.319	241.763	160.556
305.583	193.847	111.736	297.67	250.08	47.5899	389.366	292.704	96.6617	277.033	180.66	96.3731	279.904	215.002	64.9014	461.522	268.55	192.973
277.371	267.048	10.3234	370.522	253.168	117.354	314.635	288.076	26.5594	257.323	182.676	74.6473	387.094	222.026	165.068	299.033	261.283	37.7501
329.228	276.672	52.5558	539.233	254.509	284.724	302.146	277.029	25.1171	308.788	187.525	121.263	339.571	222.222	117.349	570.973	269.796	301.177
291.482	281.91	9.57154	740.69	270.794	469.897	368.236	270.454	97.7815	188.163	170.861	17.3019	656.628	225.9	430.728	324.882	258.293	66.5892
309.975	285.053	24.9215	385.107	254.472	130.635	328.777	275.477	53.3	283.09	199.312	83.7781	292.257	223.843	68.4141	307.397	262.125	45.2726
380.338	288.081	92.2572	759.793	288.56	471.233	445.846	277.091	168.754	275.194	198.538	76.656	756.775	261.303	495.472	322.427	262.434	59.9935
311.203	284.487	26.7158	765.507	267.375	498.131	534.611	313.19	221.421	333.272	204.538	128.735	778.719	232.517	546.202	451.686	267.763	183.923
314.589	283.18	31.4088	290.22	244.393	45.8267	323.518	302.144	21.3746	336.274	202.756	133.518	598.66	250.438	348.222	512.898	249.291	263.607
299.169	285.911	13.2584	583.363	290.711	292.652	571.593	338.559	233.034	300.132	199.192	100.94	751.244	258.718	492.526	509.515	265.966	243.549
320.985	278.743	42.2421	752.483	257.613	494.871	379.215	316.201	63.0143	245.762	200.219	45.5439	267.322	226.967	40.3558	505.998	270.275	235.723
291.904	273.08	18.8244	605.705	240.238	365.467	411.699	322.197	89.502	273.396	199.692	73.7043	652.027	246.497	405.53	563.237	265.449	297.789
311.865	258.064	53.8012	333.264	212.922	120.342	395.282	309.563	85.7189	282.49	196.436	86.0541	750.891	249.878	501.013	550.744	277.334	273.41
317.344	274.748	42.596	576.088	233.96	342.128	365.185	320.925	44.2605	274.614	199.458	75.1554	450.811	239.321	211.49	438.784	261.283	177.501
306.91	275.863	31.0472	305.344	216.244	89.1009	484.29	322.056	162.234	338.69	201.075	137.615	569.374	249.068	320.306	555.228	293.669	261.56
332.823	274.593	58.2293	508.458	230.66	277.798	369.287	315.74	53.547	217.807	196.792	21.0149	879.97	243.141	636.829	721.591	297.402	424.189
316.435	283.666	32.7688	249.854	214.239	35.6144	366.54	335.081	31.4598	263.019	199.732	63.2865	413.652	278.438	135.214	387.921	297.793	90.1276
301.136	280.808	20.3281	248.201	196.615	51.586	682.353	345.125	337.228	249.496	201.909	47.587	322.634	247.286	75.3482	369.138	292.231	76.9071
322.664	278.592	44.0728	256.095	203.379	52.7162	331.738	329.167	2.57119	316.878	203.655	113.223	467.523	249.117	218.407	503.786	304.376	199.41
297.061	264.238	32.8235	561.548	209.296	352.252	421.57	347.414	74.1562	249.052	202.983	46.0685	819.824	264.035	555.789	724.061	304.644	419.417
323.004	273.542	49.4616	349.85	221.123	128.727	571.022	342.878	228.144	281.699	199.87	81.8295	678.356	251.108	427.248	599.991	315.179	284.813
321.657	277.699	43.9582	421.473	222.623	198.85	463.555	360.27	103.286	266.195	196.27	69.9244	322.548	233.31	89.2377	416.201	295.574	120.628
295.112	284.314	10.7982	579.987	232.891	347.096	434.585	360.085	74.4991	334.047	203.386	130.661	801.099	250.466	550.633	555.294	309.034	246.26
295.08	287.07	8.01015	273.187	230.195	42.9922	549.715	368.631	181.084	299.35	198.417	100.933	387.942	242.532	145.41	596.004	308.773	287.231
297.655	286.473	11.1826	362.611	243.257	119.354	394.304	366.046	28.2587	205.657	191.042	14.6152	310.612	215.097	95.5147	797.167	311.801	485.366
314.843	279.826	35.0174	270.244	210.205	60.0394	369.846	343.532	26.3138	289.522	206.505	83.0172	721.487	240.409	481.078	751.143	303.746	447.397
283.504	268.304	15.1993	333.347	217.35	115.997	397.939	360.526	37.413	227.344	210.639	16.7053	555.552	235.716	319.836	552.304	305.079	247.225
286.784	264.198	22.5862	283.428	234.509	48.9189	376.155	355.099	21.0556	308.17	208.848	99.3221	703.015	250.442	452.574	617.449	292.164	325.285
302.164	269.872	32.2918	275.044	233.051	41.9927	515.568	370.929	144.639	262.078	213.204	48.8736	361.445	222.452	138.993	381.62	279.732	101.888
306.632	275.414	31.2176	705.877	238.326	467.551	449.782	346.985	102.797	267.468	210.384	57.0838	329.945	227.019	102.926	378.362	290.089	88.2738
340.009	259.755	80.2541	350.964	227.041	123.923				226.953	211.141	15.8116	753.208	232.553	520.655	437.47	276.073	161.398
271.999	262.179	9.81963	298.888	227.832	71.0561				269.709	207.04	62.6692	601.202	244.114	357.088	435.314	281.386	153.928
			563.721	244.149	319.572				214.523	204.283	10.2403	553.991	233.479	320.513	340.449	264.601	75.8473
			366.481	229.014	137.467				243.932	211.752	32.1801	276.938	226.346	50.5929
			580.597	261.258	319.339				290.335	213.015	77.3201	801.12	240.221	560.899
			306.84	258.587	48.2526				266.537	201.643	64.8948	461.987	220.874	241.112
			636.904	252.96	383.944				343.287	205.822	137.465	563.447	224.557	338.89
			452.088	245.699	206.39				216.983	206.579	10.4035	693.987	238.447	455.54
			322.987	232.209	90.7785				249.042	205.788	43.2542	624.868	214.204	410.665
			732.012	251.846	480.166				229.235	204.737	24.4978	312.008	231.587	80.4202
			307.211	225.641	81.5693				243.635	205.123	38.5124	598.483	212.614	385.869
