# Supplementary material for: Cell surface localisation of GPI-anchored receptors in Trypanosoma brucei
Source: eLife. 2026 May 19;14:RP107191. doi: 10.7554/eLife.107191 (PMC13186567; doi:10.7554/eLife.107191)
Supplement: Supplementary file 4. [file elife-107191-supp4.xlsx]

## Sheet: Sheet1
Table S3
BES1-1 GPI									BES1-2 GPI
15 sec			60 sec			600 sec			15sec			60 sec			600 sec
Tf signal	Background	Corrected	Tf signal	Background	Corrected	Tf signal	Background	Correced	Tf signal	Background	Corrected	Tf signal	Background	Corrected	Tf signal	Background	Correced
234.776	203.873	30.9024	430.576	283.905	146.672	270.643	242.393	28.2492	218.4	191.125	27.2748	724.44	217.918	506.522
304.146	202.66	101.485	427.849	292.334	135.516	287.452	240.639	46.8125	294.155	196.545	97.6102	548.995	212.351	336.644	541.017	262.699	278.318
214.218	197.734	16.4838	391.214	298.413	92.8013	534.72	257.637	277.083	212.137	195.214	16.9223	314.431	204.743	109.688	285.585	260.479	25.1053
291.237	207.828	83.4089	358.876	288.151	70.7248	277.984	240.199	37.785	262.848	194.241	68.6071	492.191	210.505	281.687	523.488	264.454	259.034
261.149	197.274	63.8743	414.639	285.791	128.849	587.767	250.114	337.653	299.164	194.356	104.808	445.27	209.295	235.975	418.35	270.351	147.999
220.736	203.537	17.1986	414.425	302.78	111.645	286.883	254.605	32.2779	248.559	197.284	51.2745	447.534	207.613	239.921	515.089	249.043	266.047
257.354	193.027	64.3264	321.398	292.16	29.2382	271.129	249.53	21.5992	335.443	195.706	139.737	748.321	206.819	541.502	698.288	275.387	422.901
286.705	247.013	39.6919	440.189	299.598	140.591	277.848	259.932	17.9158	223.67	192.648	31.0223	737.924	205.296	532.628	373.835	274.222	99.6122
271.928	245.257	26.6715	356.546	274.067	82.4789	388.458	249.883	138.575	213.017	188.502	24.5151	618.6	207.961	410.639	297.319	274.598	22.7212
316.795	258.312	58.4828	348.675	282.865	65.8096	433.71	253.865	179.844	245.348	182.301	63.0468	557.782	198.055	359.727	302.422	278.956	23.4652
268.457	245.34	23.1169	345.529	281.68	63.8485	472.247	239.099	233.148	222.283	187.058	35.2257	475.835	207.34	268.496	392.205	275.515	116.69
297.862	254.08	43.7827	394.034	281.685	112.349	262.825	249.631	13.1938	262.665	190.869	71.7961	675.614	210.883	464.731	298.67	274.819	23.8505
261.914	244.681	17.2333	385.309	278.706	106.604	520.444	255.412	265.033	222.551	191.518	31.0334	370.293	209.769	160.524	281.715	266.893	14.822
267.798	241.958	25.8397	363.552	281.644	81.9079	547.706	289.54	258.166	240.715	187.335	53.38	437.233	193.668	243.565	621.809	273.516	348.294
269.838	255.565	14.2731	443.177	263.136	180.041	537.976	278.976	259	264.646	186.379	78.2662	257.117	196.785	60.3318	286.955	273.528	13.4265
314.206	246.194	68.0119	349.054	273.28	75.774	402.977	291.007	111.971	279.265	190.411	88.8538	643.598	243.528	400.069	433.497	266.897	166.6
249.679	237.187	12.492	421.863	267.595	154.268	391.668	300.949	90.7197	268.784	194.518	74.266	527.445	240.962	286.483	420.193	273.223	146.97
263.779	247.947	15.8313	398.075	226.932	171.143	397.116	303.767	93.3488	242.43	198.96	43.4703	467.699	229.329	238.37	290.178	262.667	27.5109
301.327	274.136	27.1907	351.622	220.224	131.398	567.663	291.537	276.126	282.006	194.094	87.9124	263.91	217.802	46.1072	341.554	263.004	78.5498
272.658	250.799	21.8588	470.561	233.376	237.185	432.438	292.398	140.04	249.62	199.163	50.4572	330.397	239.601	90.7956	426.453	277.98	148.474
271.739	249.967	21.7725	302.103	230.453	71.6504	619.408	285.107	334.301	236.263	197.903	38.3606	748.096	239.377	508.719	466.514	275.52	190.993
357.304	334.773	22.5318	291.687	222.74	68.9473	402.321	342.111	60.2103	279.75	193.189	86.5613	436.886	249.448	187.438	491.688	264.246	227.442
341.01	323.147	17.8638	425.499	223.205	202.294	453.869	360.022	93.8466	292.409	195.5	96.9085	273.319	258.868	14.4509	429.519	267.605	161.914
338.434	325.604	12.8294	506.686	215.681	291.005	405.981	350.033	55.9478				376.521	257.251	119.269	328.923	273.941	54.9826
343.671	332.412	11.2587										720.093	230.733	489.36	320.969	266.209	54.7603
352.479	322.307	30.1721										795.16	241.604	553.556	296.599	279.496	17.103
												378.107	221.609	156.498	445.503	280.268	165.235
												348.532	237.285	111.247	469.347	277.759	191.589
												358.096	236.25	121.846	296.463	270.56	25.9034
												511.256	222.831	288.425	514.764	264.364	250.4
												261.156	231.917	29.2396	509.202	275.455	233.748
												759.17	221.643	537.527	504.499	270.451	234.048
												784.148	216.541	567.607
												277.339	233.244	44.0954
