# Supplementary material for: Cell surface localisation of GPI-anchored receptors in Trypanosoma brucei
Source: eLife. 2026 May 19;14:RP107191. doi: 10.7554/eLife.107191 (PMC13186567; doi:10.7554/eLife.107191)
Supplement: Supplementary file 5. [file elife-107191-supp5.xlsx]

## Sheet: Sheet1
		Table S4
		BES1-1GPI				BES1-2GPI			BES7-1 GPI				BES7-2GPI
		FI of cell	FI background	Corrected		FI of cell	FI background	Corrected	Cell FI	Background FI	Corrected		Cell FI	Background FI	Corrected
		4169.19	1369.28	2799.91		7397.91	1601.34	5796.57	12837	4681.34	8155.68		14596.8	3396.05	11200.8
		5517.01	1518.64	3998.37		5194.64	2016.59	3178.04	17856.9	5163.71	12693.2		12827.5	3393.02	9434.5
		4466.69	1366.8	3099.88		5046.05	1414.74	3631.31	14578.6	6733.44	7845.16		12743.2	3332.91	9410.28
		4454.89	1355.08	3099.81		7014.5	1602.2	5412.3	8257.6	4489.83	3767.77		12563.7	3331.35	9232.38
		3703.72	1403.4	2300.31		9167.46	1671.26	7496.19	21507.9	6313.37	15194.5		11161.6	3277.69	7883.91
		3883.55	1423.43	2460.12		4705.5	1980.23	2725.28	9684.07	6390.33	3293.74		10628.5	3184.04	7444.46
		4161.71	1313.02	2848.69		5314.2	1671.4	3642.79	11574.1	2055.71	9518.37		10364	3162.29	7201.71
		5345.77	1237.78	4108		5140.15	1549.04	3591.11	14178.8	3363.52	10815.3		9940.49	3076.53	6863.96
		3812.64	1395.98	2416.67		6865.55	1434.12	5431.43	9229.06	3063.71	6165.36		9574.1	3051.88	6522.21
		5233.52	1460.97	3772.55		5011.46	1530.49	3480.97	11373.1	2629.73	8743.35		9342.32	3027.09	6315.23
		4416.27	1305.2	3111.07		5880.58	1596.31	4284.27	9459.26	3335.65	6123.61		9010.89	3011.91	5998.98
		5690.69	1456.09	4234.6		5714.74	1723.14	3991.6	16907.3	5001.22	11906.1		8607.01	2963.33	5643.67
		4974.74	1634.37	3340.36		4558.89	1614.54	2944.35	12640.7	3904.67	8736.06		7853.72	2955.74	4897.98
		4159.68	1728.3	2431.38		6957.89	1697.7	5260.2	9608.94	4574.55	5034.4		7065.93	2879.6	4186.33
		5966.4	1562.48	4403.91		4531.51	1858.15	2673.35	21017	4752.91	16264		6760.39	2828.95	3931.44
		6844.52	1658.04	5186.48		4075.36	1559.92	2515.45	18762.9	5075.52	13687.4		6125.5	2805.09	3320.41
		4849.83	1290.27	3559.55		6386.45	1525.08	4861.37	10587.8	4418.43	6169.35		5915.6	2774.39	3141.21
		4387.02	1368.57	3018.44		4768.65	1532.22	3236.43	6315.1	3887.98	2427.13		13164.1	4607.84	8556.28
		4039.22	1581.34	2457.89		5121.04	1810.44	3310.6	5872.18	4196.64	1675.54		14804.4	4590.82	10213.6
		5653.92	1854.64	3799.28		4289.89	1661.77	2628.12	6740.7	4107.35	2633.35		12044.1	5208.19	6835.94
		6128.89	1760.48	4368.41		4224.13	1657.07	2567.06	22877.5	5306.46	17571.1		19551.7	5003.87	14547.8
		5461.05	2209.06	3251.99		4022.22	1542.07	2480.16	8086.63	5258.44	2828.19		15227.6	5833.94	9393.62
		4121.67	2404.91	1716.76		4757.78	1640.24	3117.53	12070.3	4203.2	7867.14		14260.8	4752.39	9508.39
		4697.12	1530	3167.12		3972.69	1458.74	2513.96	11069.5	3399.07	7670.45		19235.8	4988.07	14247.7
		4032.47	2088.28	1944.18		4952.72	1439.38	3513.34	8798.1	3788.96	5009.13		9781.47	4129.6	5651.88
		4472.14	1651.83	2820.31		4829.97	1417.78	3412.19	8394.35	3715.74	4678.61		13489.7	3658.64	9831.05
		4666.66	1196.71	3469.95		4799.97	1399.56	3400.41	8378.8	4547.47	3831.33		16104.7	4310.66	11794
		6836.59	1242.25	5594.34		6406.86	1455.45	4951.41	7918.7	3390.73	4527.96		15238.8	4766.48	10472.3
		4340.13	1147.18	3192.94		5247.46	1510.92	3736.53	11518	3080.51	8437.47		11790.3	3839.99	7950.28
		4544.95	1208.12	3336.83		4812.54	1432.03	3380.51	10405.1	3515.79	6889.36		15302.1	3715.73	11586.4
		4244.88	1238.19	3006.68		3891.33	1322.37	2568.96	9353.18	2897.44	6455.74		7879.73	3866.96	4012.77
		3591.78	1674.25	1917.53		4230.59	1453.39	2777.2	15463	3867.06	11596		10672.9	3674.82	6998.06
		4342.66	1209.5	3133.16		5191.87	1473.93	3717.94	8263.89	2437.18	5826.72		10890.2	3531.5	7358.67
		4607.31	1101.59	3505.72		4181.72	1518.49	2663.23	7236.7	3213.57	4023.13		10747.3	4092.11	6655.18
		4303.84	1400.34	2903.5		5322.5	1662.18	3660.32	4704	2573.29	2130.71		12120.6	3893.13	8227.43
		4061.94	1506.88	2555.06		5375.11	1330.79	4044.32	14961.5	3747.42	11214.1		10693.8	3313.44	7380.34
		4602.69	1395.4	3207.29		5076.07	1336.95	3739.12	13139.3	3888.16	9251.18		11334.7	4036.58	7298.16
		4478.12	1502.68	2975.44		5146.07	1568.86	3577.21	17609	4108.78	13500.2		9852.48	4077.37	5775.1
		4903.38	1312.07	3591.3		3651.24	1499.64	2151.6	10541.4	3529.87	7011.55		13146.6	4806.09	8340.48
		3691.56	1389.24	2302.32		4230.18	1501.3	2728.89	7598.98	3195.2	4403.77		12910.8	4896.15	8014.64
		3363.79	1299.7	2064.09		4648.15	1444.07	3204.08	15210	3511.77	11698.3		9639.81	3884.36	5755.45
		3387.94	1428.84	1959.1		4921.54	1618.39	3303.15	6002.27	1336.8	4665.47		14823.3	5220.65	9602.66
		3595.42	1487.81	2107.61		5262.78	1663.9	3598.88	7559.97	1619.01	5940.96		12603	4471.41	8131.54
		3073.78	1375.52	1698.26		5094.48	1515.95	3578.53	11302.2	1938.84	9363.32		10275.7	4019.51	6256.21
		2946.88	1334.97	1611.91		5069.51	1799.37	3270.14	11072.6	1652.44	9420.14		12437.1	3568.67	8868.46
		3583.73	1531.63	2052.11		4622.1	1412.16	3209.94	4273.02	1673.77	2599.25		11381.7	4956.2	6425.48
		4565.25	1370.68	3194.58		4646.93	1466.65	3180.28	10248.1	1698.39	8549.67		12961.4	3769.23	9192.2
		3289.89	1503.72	1786.17		4191.7	1302.98	2888.72	6818.37	1502.03	5316.33		28652.1	7790.19	20861.9
		3901.69	1475.31	2426.38		3250.59	1610.01	1640.59	7678.35	1599.25	6079.1		39810.3	7348.83	32461.5
		4489.07	1677.21	2811.86		5114.45	2225.05	2889.41	13071	2013.21	11057.8		11230.3	5746.29	5484.01
		3344.63	1442.4	1902.23		4169.28	1557.3	2611.98	5902.91	1489.59	4413.33		34734.5	8056.45	26678
		3226.47	1737.64	1488.83		5792.44	1510.42	4282.03	6371.34	1500.69	4870.66		10087	6371.83	3715.19
		4014.51	1757.64	2256.87		4092.54	1577.28	2515.26	8271.58	1379.04	6892.55		22591.5	7408.28	15183.2
		4816.73	1683.81	3132.92		3919.93	1439.59	2480.35	11719.5	1918.4	9801.14		29298.3	6245.78	23052.6
		3354.05	2063.55	1290.51		3929.93	1387.49	2542.44	11442.9	1962.46	9480.41		17178.1	5795.59	11382.6
		3515.59	1466.18	2049.41		3469.23	1284.56	2184.67	3919.9	1285.24	2634.66		30589	8105.1	22483.9
		3846.69	1294.55	2552.14		3484.57	1504.05	1980.52	8493.24	1627.56	6865.69		10660.5	5307.62	5352.86
		3776.52	1309.98	2466.54		6399.72	1424.08	4975.64	10624.5	4166.08	6458.41		23269.4	4672.84	18596.5
		3469.76	1414.83	2054.93		5678.35	1760.17	3918.18	8933.72	3393.77	5539.95		15321	5381.67	9939.35
		4986.73	1276.05	3710.68					12578.3	3328.3	9249.96		18432.6	6361.81	12070.8
		3775.15	1180.5	2594.66					9401.38	3636.61	5764.78		22047.3	5155.24	16892.1
		4504.38	1081.43	3422.95					17873.2	4066.34	13806.8		44621.7	10497.3	34124.4
		2792.17	1034.3	1757.87					14654.6	2931.93	11722.6		14672.1	6648.39	8023.73
		3021.99	1350.47	1671.52					8199.72	2538.99	5660.73		25233.7	9512	15721.7
		3434.44	1301.4	2133.03					10690.4	2804.72	7885.64		28621.3	9512	19109.3
		3546.78	1272.61	2274.16					17867.2	3092.73	14774.5		21952.2	8968.63	12983.6
		3986.38	1438.23	2548.15					6417.39	2788.9	3628.49		17127.1	9357.45	7769.68
									6908.06	2958.14	3949.92		41312.7	12880.4	28432.3
									20683.5	3047.92	17635.6		21815.5	9429.58	12385.9
									6095.31	2798.56	3296.74		7354.7	3872.35	3482.36
									14839.7	2914.05	11925.6		27227.1	7005.97	20221.1
									13068.4	3060.77	10007.6		20877.7	8990.72	11887
									6706.25	3121.48	3584.76		26307.2	8765.74	17541.4
									16044.9	4262.14	11782.8		32094.9	7321.51	24773.4
									15395.4	6158.93	9236.43		13807.3	6878.01	6929.29
									13498.8	3595.4	9903.4		37369.6	9009.61	28360
									9703.24	3741.26	5961.98		31935.5	9140.16	22795.3
									19649.3	4109.21	15540.1		16396.8	8824.27	7572.51
									17432.4	4652.48	12779.9		40337.1	10206.1	30131
									15859.7	3661.14	12198.5		18378	10058.2	8319.83
									17979.3	5041.83	12937.5		37444.6	9070.05	28374.5
									16472.6	3590.97	12881.6		22141.4	7954.17	14187.3
									14309.9	4121.27	10188.6		22923	7011.73	15911.2
									16235.6	4150.48	12085.1		24585.3	7588.65	16996.6
									17900.7	4531.93	13368.7		13685.7	7217.59	6468.15
									14657.5	3777.59	10879.9		36561	9776.43	26784.6
									15432.4	4341.38	11091		18183.3	11097.8	7085.58
									20632.1	3979.57	16652.6		20765.1	9152	11613.1
									17866.5	4037.67	13828.8		9734.2	7437.76	2296.44
									17459	4786.22	12672.8		10807.3	8079.42	2727.84
									9560.24	3368.63	6191.62		20203.9	8409.66	11794.3
									4606.18	2927.84	1678.34		16519	7678.61	8840.4
									4596.8	3020.69	1576.11		18698.6	6087.99	12610.6
									6663.79	2985.63	3678.16		13361.1	4958.97	8402.13
									7239.77	3475.28	3764.49		9484.53	4920.36	4564.17
									8663.69	3501.51	5162.18		22564.4	6224.63	16339.8
													10647.1	6146.33	4500.72
													26330.9	8926.82	17404
													33165.9	9949.59	23216.3
													25891.9	8903.46	16988.5
													10112.6	6528.54	3584.07
													36326.5	8593.37	27733.2
													35099	7446.48	27652.5
